# Supplementary material for: Polarized Entry of Human Parechoviruses in the Airway Epithelium
Source: Front Cell Infect Microbiol. 2018 Aug 22;8:294. doi: 10.3389/fcimb.2018.00294 (PMC6119779; doi:10.3389/fcimb.2018.00294)
Supplement: Supplementary file 3 [file Table_1.XLS]

## Sheet: Sheet1
Supplementary Table 1. All differentially expressed genes in HPeV1-infected HAE versus the mock.
Fold change (FC), Log2 FC (logFC), Average expression (AveExprs), t-statistics (t), Adjusted p value (adj.P.Val)
Gene	FC	logFC	AveExprs	t	adj.P.Val
MX1	6.266	2.648	11.31	42.89	3.016e-16
IFI44L	73.94	6.208	8.627	38.13	5.772e-16
CMPK2	18.36	4.198	8.509	38.08	5.772e-16
IFI6	6.421	2.683	11.66	39.23	5.772e-16
IFIT1	31.17	4.962	9.806	38.89	5.772e-16
MX2	11.23	3.489	9.691	37.57	6.196e-16
OAS2	10.35	3.371	9.816	35.49	1.56e-15
RSAD2	16.63	4.055	7.877	33.36	4.387e-15
CXCL10	88.82	6.473	8.752	33.08	4.585e-15
STAT1	4.228	2.08	10.67	32.89	4.585e-15
HERC6	6.891	2.785	9.074	32.6	4.929e-15
XAF1	8.305	3.054	9.939	31.69	7.718e-15
IFIT2	35.56	5.152	9.305	31.53	7.823e-15
IFI27	4.625	2.209	11.42	31.08	9.509e-15
OAS3	10.99	3.458	8.706	30.95	9.618e-15
IFITM1	7.196	2.847	11.09	30.37	1.285e-14
OAS1	9.855	3.301	10.52	27.35	8.63e-14
PARP9	3.347	1.743	9.926	26.11	1.953e-13
LAMP3	5.814	2.539	9.55	24.65	5.128e-13
LAP3	2.787	1.479	10.83	24.66	5.128e-13
UBE2L6	3.156	1.658	10.78	24.22	6.772e-13
SAMD9L	6.989	2.805	9.77	23.78	9.096e-13
USP18	4.825	2.27	9.451	23.33	1.24e-12
DDX60	4.041	2.015	8.749	23.28	1.24e-12
OASL	18.32	4.195	8.828	22.75	1.814e-12
IFIT3	21.59	4.432	10.1	22.45	2.238e-12
SP110	3.359	1.748	9.904	21.97	3.21e-12
IFI44	5.879	2.555	8.013	21.92	3.23e-12
BST2	4.571	2.192	8.731	21.4	4.836e-12
ISG15	24.06	4.589	8.105	21.33	4.971e-12
LY6E	2.219	1.15	11.68	21.17	5.458e-12
EIF2AK2	2.566	1.36	10.4	21.15	5.458e-12
DDX58	5.705	2.512	8.908	20.74	7.605e-12
EPSTI1	7.884	2.979	7.935	19.84	1.672e-11
CXCL11	39.69	5.311	7.434	19.06	3.356e-11
IFIT5	3.885	1.958	7.196	18.87	3.935e-11
DDX60L	5.495	2.458	8.37	18.79	4.155e-11
SAMD9	3.189	1.673	10.29	18.62	4.771e-11
ETV7	4.561	2.189	6.861	18.32	6.221e-11
TRIM14	2.507	1.326	8.954	18.26	6.445e-11
IDO1	20.87	4.383	7.526	17.74	1.067e-10
IRF9	2.241	1.164	10.09	17.7	1.084e-10
IFIH1	4.891	2.29	9.175	17.53	1.257e-10
DTX3L	2.813	1.492	9.118	17.45	1.338e-10
IFI35	4.276	2.096	8.442	17.25	1.61e-10
GBP1	3.015	1.592	9.101	16.86	2.384e-10
TRIM25	2.133	1.093	9.874	16.77	2.547e-10
TRANK1	2.441	1.288	8.255	16.35	3.96e-10
PARP14	2.598	1.377	10.37	16.1	5.127e-10
RTP4	3.181	1.669	8.293	16.01	5.559e-10
IRF7	4.298	2.104	7.707	14.85	2.083e-09
C19orf66	3.024	1.596	7.662	14.81	2.121e-09
TRIM22	2.231	1.158	10.08	14.68	2.434e-09
DHX58	3.175	1.667	8.131	14.29	3.836e-09
RNF213	2.215	1.147	8.396	14.12	4.691e-09
HERC5	11.7	3.549	6.774	13.31	1.29e-08
APOL6	2.001	1	7.656	13.26	1.353e-08
PARP12	2.799	1.485	9.838	13.1	1.635e-08
IFI16	1.842	0.881	10.47	12.62	3.066e-08
PLSCR1	2.395	1.26	10.03	12.61	3.066e-08
TAP1	2.918	1.545	7.551	12.37	4.211e-08
GBP4	3.736	1.901	7.791	12	6.898e-08
TMEM140	4.036	2.013	7.683	11.99	6.898e-08
TNFSF13B	8.596	3.104	6.374	11.92	7.479e-08
PSMB8-AS1	2.432	1.282	7.067	11.71	1.003e-07
ISG20	3.826	1.936	7.501	11.62	1.122e-07
SPATS2L	1.726	0.7878	10.99	11.59	1.158e-07
STAT2	2.429	1.28	8.797	11.55	1.214e-07
HSH2D	3.576	1.838	7.12	11.43	1.429e-07
APOL1	2.144	1.1	9.413	11.28	1.751e-07
PNPT1	2.048	1.034	8.72	11.26	1.768e-07
HELZ2	3.024	1.596	6.23	11.12	2.155e-07
TDRD7	1.917	0.9386	8.463	11.1	2.192e-07
APOBEC3F	1.898	0.9249	8.862	11.02	2.457e-07
LOC100419583	3.662	1.872	7.484	10.99	2.533e-07
LGALS9	2.56	1.356	9.922	10.9	2.836e-07
SP100	2.213	1.146	8.423	10.87	2.931e-07
PPM1K	2.94	1.556	6.341	10.85	2.996e-07
TRIM21	2.279	1.188	7.977	10.84	3.031e-07
DUOXA2	11.92	3.575	7.964	10.68	3.737e-07
PSMB9	2.694	1.43	9.782	10.69	3.737e-07
IFITM2	1.519	0.6036	11.67	10.58	4.316e-07
APOBEC3G	2.424	1.277	7.705	10.54	4.528e-07
HRASLS2	3.809	1.93	9.015	10.46	5.115e-07
CD38	1.919	0.94	10.36	10.34	6.142e-07
NMI	2.397	1.261	8.21	10.31	6.35e-07
HLA-F	3.124	1.644	9.411	10.24	6.99e-07
TAP2	2.469	1.304	8.234	10.2	7.382e-07
DUOX2	4.322	2.112	8.394	9.803	1.386e-06
PSMB8	1.88	0.9107	9.797	9.752	1.491e-06
ZBP1	8.211	3.037	5.506	9.388	2.713e-06
SLC25A28	2.329	1.219	6.971	9.305	3.088e-06
GBP5	3.92	1.971	6.411	9.206	3.619e-06
TYMP	2.145	1.101	8.612	9.19	3.647e-06
TGM2	2.542	1.346	9.229	9.184	3.647e-06
STARD5	2.162	1.112	7.625	9.183	3.647e-06
IRF1	1.616	0.6922	8.788	9.106	4.078e-06
NUB1	1.732	0.7926	9.667	9.107	4.078e-06
DST	-1.463	-0.5488	9.371	-9.018	4.703e-06
RASGRP3	5.552	2.473	5.392	8.932	5.416e-06
RIPOR2	3.019	1.594	6.53	8.906	5.606e-06
MYD88	2.007	1.005	9.72	8.726	7.628e-06
CX3CL1	1.639	0.7124	10.12	8.662	8.466e-06
LGALS3BP	1.806	0.8527	10.86	8.64	8.728e-06
GBP3	1.642	0.7153	10.26	8.487	1.137e-05
WARS	1.71	0.7739	10.96	8.388	1.347e-05
PML	2.191	1.132	9.388	8.265	1.672e-05
TRIM38	1.839	0.8793	8.523	8.247	1.713e-05
PATL2	2.251	1.171	7.078	8.119	2.15e-05
BATF2	3.042	1.605	6.687	8.067	2.344e-05
ZNFX1	1.731	0.7913	9.419	8.034	2.47e-05
APOL4	1.992	0.9945	6.932	7.991	2.654e-05
TOR1B	2.448	1.291	8.036	7.983	2.671e-05
HLA-B	1.756	0.8127	11.14	7.869	3.248e-05
TLR3	2.133	1.093	8.838	7.873	3.248e-05
SELL	2.559	1.356	5.757	7.859	3.281e-05
KLHDC7B	2.295	1.198	6.645	7.831	3.435e-05
ADAR	1.799	0.8474	8.283	7.826	3.437e-05
SERPING1	3.534	1.821	7.184	7.808	3.493e-05
PARP10	1.869	0.9023	6.995	7.81	3.493e-05
SHISA5	1.36	0.4434	11.44	7.799	3.529e-05
HLA-E	1.851	0.8887	10.16	7.79	3.561e-05
GTPBP2	1.77	0.8242	8.357	7.778	3.609e-05
STS	1.653	0.7249	8.738	7.755	3.739e-05
CFH	1.923	0.9437	9.336	7.715	4.008e-05
TNFAIP2	3.043	1.606	9.017	7.669	4.342e-05
CEACAM1	2.873	1.522	9.783	7.649	4.469e-05
CMTR1	1.64	0.7136	8.289	7.631	4.592e-05
CXCL1	2.275	1.186	9.275	7.593	4.899e-05
TRIM5	2.486	1.314	7.369	7.567	5.12e-05
CD68	3.005	1.587	8.007	7.558	5.161e-05
CCL20	4.752	2.248	8.782	7.537	5.333e-05
RARRES3	1.372	0.4563	10.16	7.518	5.498e-05
SOD2	2.067	1.047	10.35	7.5	5.649e-05
CYP2J2	1.607	0.6842	8.963	7.484	5.759e-05
NT5C3A	2.678	1.421	7.657	7.482	5.759e-05
SLC43A2	1.388	0.4726	10.28	7.453	6.051e-05
FBXO6	1.637	0.7112	7.875	7.421	6.396e-05
SIDT1	1.802	0.8497	7.086	7.358	7.182e-05
BIRC3	2.695	1.43	8.81	7.343	7.34e-05
SLFN5	1.509	0.5939	10.3	7.195	9.745e-05
TNFSF10	1.412	0.4974	11.71	7.183	9.908e-05
UNC93B1	1.27	0.3445	10.88	7.151	0.000105
HLA-C	1.707	0.7717	10.58	7.146	0.0001053
CXCL8	3.071	1.619	8.907	7.109	0.0001126
C1S	4.185	2.065	6.461	7.067	0.0001214
SAA1	1.946	0.9602	11.62	7.009	0.0001354
ACE2	2.158	1.11	6.85	7.005	0.0001356
APOL2	1.72	0.7822	8.223	6.996	0.0001364
XDH	3.225	1.689	6.868	6.995	0.0001364
BCL3	1.545	0.6275	8.488	6.992	0.0001365
XRN1	1.398	0.4833	7.947	6.945	0.0001491
ZC3H12A	2.162	1.112	9.265	6.938	0.00015
UBA7	1.559	0.6403	8.572	6.926	0.0001527
NCOA7	2.206	1.142	9.927	6.895	0.0001615
OPTN	1.433	0.5187	9.406	6.88	0.0001656
FRMD3	3.676	1.878	6.647	6.861	0.000171
CXCL14	-2.307	-1.206	8.078	-6.852	0.0001727
SELPLG	1.629	0.7043	6.845	6.823	0.0001823
CNP	1.838	0.8781	8.048	6.652	0.0002564
CFB	1.979	0.9851	11.4	6.638	0.0002624
NUPR1	1.388	0.4735	11.54	6.623	0.0002688
ACSL5	1.459	0.5454	8.603	6.612	0.0002733
PARP8	1.681	0.7493	9.345	6.589	0.0002848
TMEM268	1.489	0.5745	8.773	6.565	0.0002976
LRG1	1.492	0.5769	8.12	6.559	0.0002993
BCL2L14	2.016	1.012	6.105	6.546	0.0003057
FAM46A	1.81	0.8563	7.106	6.412	0.0004016
CSF1	2.636	1.398	6.515	6.401	0.0004079
NFKBIA	1.658	0.7293	9.923	6.395	0.0004106
ZC3HAV1	1.391	0.4758	9.41	6.391	0.0004106
PSME2	1.63	0.705	7.544	6.39	0.0004106
FCHSD2	1.457	0.5433	9.063	6.309	0.0004832
RNF31	1.523	0.6065	7.121	6.279	0.0005114
TMEM62	1.596	0.6749	7.379	6.254	0.0005368
SECTM1	2.411	1.27	7.568	6.24	0.0005493
APOBEC3A	5.083	2.346	8.183	6.183	0.0006165
ANKFY1	1.375	0.4597	8.544	6.14	0.0006695
TLR2	2.456	1.297	7.274	6.138	0.0006695
IL36G	2.999	1.585	7.558	6.093	0.000733
SMCHD1	1.58	0.6599	7.326	6.088	0.0007365
S100A7	3.04	1.604	8.245	6.069	0.000763
ARHGAP26	1.402	0.4879	9.012	6.01	0.0008597
MYO5A	-1.581	-0.6609	6.718	-6.001	0.0008725
CD274	2.223	1.152	6.817	5.991	0.0008854
HCP5	2.449	1.292	7.515	5.981	0.0009001
RFX5	1.494	0.5791	8.707	5.904	0.001056
GBP2	2.161	1.112	6.962	5.9	0.00106
SLC5A8	2.061	1.043	5.968	5.884	0.001091
ITGAV	-1.549	-0.6309	7.983	-5.879	0.001098
HSPA5	1.212	0.277	10.77	5.873	0.001104
IRAK3	1.796	0.845	9.184	5.863	0.001124
RNF114	1.414	0.5002	9.041	5.85	0.00115
NAPA	1.382	0.4668	9.946	5.84	0.001169
CIITA	1.806	0.8529	8.543	5.819	0.001216
EVI2B	2.359	1.238	5.686	5.79	0.001287
TNFRSF10D	-1.621	-0.6967	6.518	-5.786	0.001289
IKBKE	1.859	0.8944	8.614	5.785	0.001289
TAPBP	1.319	0.3998	10.59	5.763	0.001346
LDLR	1.609	0.6865	9.818	5.739	0.001403
CXCL6	1.865	0.899	8.771	5.739	0.001403
NXT2	1.557	0.6392	7.96	5.733	0.001415
HLA-DQB1	1.617	0.6932	8.235	5.716	0.001461
C1GALT1	1.377	0.4616	8.152	5.708	0.00148
HLA-DMA	1.429	0.5147	10.96	5.678	0.00157
NFE2L3	1.831	0.873	8.263	5.654	0.001646
CCL5	5.082	2.345	6.572	5.633	0.001708
C6orf62	1.246	0.3174	10.02	5.634	0.001708
PDZK1IP1	2.575	1.365	9.809	5.627	0.001719
MMP7	1.812	0.8579	7.392	5.618	0.001748
PSMB10	1.438	0.5245	8.327	5.611	0.001764
IGFBP3	1.679	0.7475	10.62	5.599	0.001802
SERPINA3	2.68	1.422	8.743	5.585	0.001852
GNB4	1.456	0.5423	7.826	5.569	0.001907
RNF19B	1.381	0.4653	8.95	5.551	0.001937
EXT1	1.438	0.5238	9.444	5.552	0.001937
SLC25A6	-1.266	-0.3408	10.95	-5.554	0.001937
NDUFC1	1.376	0.4605	8.658	5.556	0.001937
PCGF5	1.706	0.7709	7.503	5.552	0.001937
VNN3	1.8	0.8478	7.93	5.545	0.001958
EHD4	1.537	0.6197	8.556	5.541	0.001966
RBMS2	1.423	0.5085	9.362	5.538	0.001968
CASP1	1.918	0.9395	6.302	5.505	0.002106
MLKL	2.401	1.263	5.593	5.503	0.002108
HLA-G	1.656	0.7277	7.507	5.483	0.002192
PI3	1.292	0.3695	12.54	5.479	0.002201
RARRES1	2.432	1.282	9.535	5.439	0.002394
SLC26A4	6.154	2.621	6.493	5.436	0.002399
HSD17B10	-1.455	-0.5414	6.732	-5.416	0.002493
LCN2	1.753	0.8097	11.56	5.4	0.002572
GRWD1	1.353	0.4358	8.895	5.396	0.002584
KRT15	-1.59	-0.669	8.164	-5.372	0.002708
PSMA6	1.524	0.6074	9.001	5.371	0.002708
CXCL3	2.77	1.47	6.913	5.339	0.002892
HS3ST1	1.606	0.6839	8.109	5.331	0.00293
TNFAIP3	1.415	0.5007	11.22	5.316	0.003021
HTR2B	2.17	1.118	6.032	5.311	0.00304
LYN	1.44	0.5262	9.633	5.3	0.003086
MUC13	2.81	1.491	8.76	5.301	0.003086
ABAT	1.719	0.7813	6.487	5.289	0.003138
HLA-DOA	1.941	0.9568	7.656	5.289	0.003138
PDCD1LG2	2.631	1.396	5.838	5.273	0.003239
MUC15	1.215	0.2807	10.97	5.248	0.003401
YPEL3	-1.204	-0.2681	9.856	-5.247	0.003401
ATP10B	1.959	0.9704	7.418	5.242	0.003425
CCL2	1.936	0.9532	5.13	5.239	0.003432
DEFB4B	3.783	1.92	3.251	5.209	0.00366
CXCL16	1.42	0.5063	9.651	5.201	0.003706
CASP7	1.215	0.281	9.325	5.199	0.003708
GMPR	1.814	0.8588	8.121	5.191	0.00375
CALR	1.149	0.201	11.76	5.191	0.00375
DOC2B	1.557	0.6389	7.594	5.172	0.003897
GSDMB	1.653	0.7254	8.819	5.159	0.00399
CEBPZOS	-1.29	-0.367	8.711	-5.155	0.004008
ADRB2	1.661	0.7324	7.285	5.154	0.004008
BTN2A2	1.426	0.5118	8.523	5.131	0.004197
GTPBP1	1.38	0.4642	7.955	5.095	0.004537
ADAM28	1.605	0.683	8.164	5.089	0.004579
TRIM31	3.321	1.732	6.107	5.074	0.004697
PATL1	1.378	0.4623	8.996	5.074	0.004697
SQOR	1.443	0.529	9.15	5.064	0.004786
UBQLNL	2.516	1.331	5.427	5.043	0.004994
STX11	1.656	0.7278	8.121	5.038	0.005032
CTSV	-1.906	-0.9306	7.007	-5.035	0.00505
BTN3A1	1.649	0.7218	7.28	5.022	0.005173
ERAP2	1.922	0.9428	5.094	5.008	0.005323
PLEKHA7	1.256	0.329	8.825	5.004	0.005348
BTC	1.58	0.6596	6.957	4.983	0.005589
FGD2	2.161	1.112	5.686	4.963	0.0058
HLA-DRB1	1.509	0.5937	10.35	4.964	0.0058
PTGR1	-1.306	-0.3851	8.658	-4.952	0.005916
BMP3	1.553	0.6352	6.588	4.951	0.005916
LIFR	1.917	0.9388	6.422	4.942	0.006012
IL1A	2.324	1.217	7.739	4.931	0.006141
SLC6A20	1.405	0.4908	9.394	4.915	0.00634
PTGS2	2.581	1.368	6.763	4.896	0.006592
LOC100130691	-1.705	-0.7694	4.122	-4.893	0.006594
NADK	1.479	0.5643	9.506	4.894	0.006594
PGLYRP4	1.872	0.9044	6.167	4.886	0.006683
HLA-A	1.64	0.7139	10.09	4.876	0.006774
NT5DC2	-1.466	-0.5524	8.186	-4.878	0.006774
SCLT1	1.335	0.417	7.217	4.869	0.006844
CLEC7A	1.753	0.8098	8.512	4.869	0.006844
IL22RA1	1.62	0.6956	6.48	4.866	0.006867
HLA-DRB6	1.636	0.7105	10.22	4.861	0.006917
DSC2	-1.714	-0.7774	8.327	-4.852	0.007035
LPAR6	1.539	0.6216	8.574	4.849	0.007053
SLC15A3	1.945	0.9599	6.129	4.848	0.007053
KMO	2.762	1.466	5.154	4.831	0.007296
MYLK	-1.787	-0.8377	7.337	-4.826	0.007348
EIF3A	-1.185	-0.2447	9.51	-4.819	0.007445
CSF3	3.442	1.783	6.468	4.806	0.00764
UBD	1.747	0.8047	6.099	4.803	0.007674
APOBEC3D	1.53	0.6132	7.316	4.797	0.007702
TRIB2	1.591	0.6695	7.709	4.797	0.007702
ACADVL	-1.311	-0.3907	8.751	-4.797	0.007702
MSS51	-1.577	-0.6571	5.533	-4.769	0.008167
RHBDF2	1.456	0.5422	8.67	4.764	0.008237
LYSMD2	1.523	0.6068	5.979	4.759	0.008307
ELF3	1.253	0.3252	9.106	4.756	0.008326
N4BP1	1.277	0.3527	10.65	4.755	0.008326
PSME1	1.281	0.3574	9.166	4.732	0.008733
CHST4	2.085	1.06	6.392	4.717	0.009016
CDH6	-1.91	-0.9332	5.703	-4.705	0.009234
TCIM	1.754	0.8108	6.281	4.692	0.009473
CARD16	1.661	0.7316	6.86	4.686	0.009562
ALPK3	-1.409	-0.4951	6.25	-4.667	0.009962
MMP9	1.552	0.6345	9.201	4.665	0.009975
TNC	-2.023	-1.017	7.428	-4.663	0.009978
HLA-DPB1	1.584	0.6632	9.378	4.651	0.01022
RABGAP1L	1.314	0.3942	8.469	4.639	0.01047
RPL4	-1.228	-0.2963	10.45	-4.634	0.01056
COMMD6	-1.237	-0.3066	8.827	-4.629	0.01066
CASP10	1.551	0.6331	7.191	4.626	0.01068
GRINA	1.186	0.2467	10.12	4.615	0.01091
DHRS13	1.737	0.7965	7.13	4.609	0.01103
SLC9A8	1.235	0.305	8.844	4.602	0.01118
TMEM229B	1.509	0.5934	7.862	4.582	0.01166
TRIM26	1.279	0.3553	8.592	4.578	0.0117
CFLAR	1.219	0.2862	11.35	4.579	0.0117
KRT14	-1.617	-0.6935	10.83	-4.573	0.01178
FLRT2	-1.521	-0.6053	5.155	-4.569	0.01186
ACSL1	1.26	0.333	9.021	4.564	0.01195
DAPK1	-1.333	-0.4143	7.547	-4.562	0.01197
KIDINS220	-1.226	-0.2944	8.253	-4.561	0.01197
BOD1L1	-1.325	-0.4056	7.129	-4.559	0.01199
STON2	-1.313	-0.3926	7.492	-4.552	0.01215
PIK3AP1	1.412	0.4979	7.183	4.539	0.01244
PI4K2B	1.452	0.5376	7.851	4.54	0.01244
SLC39A8	2.49	1.316	5.664	4.534	0.01254
FN1	-1.634	-0.7083	9.556	-4.518	0.01291
MCC	-1.486	-0.5716	6.77	-4.519	0.01291
MYH9	-1.336	-0.4184	8.897	-4.513	0.01304
IL18BP	1.688	0.7557	7.238	4.5	0.0134
FAS	1.407	0.4923	8.172	4.495	0.01349
HLA-DQA1	1.979	0.9844	10.34	4.484	0.01379
CCND3	1.299	0.3779	9.523	4.483	0.01379
HLA-DMB	1.596	0.6747	6.614	4.479	0.01387
SLC13A3	1.446	0.5324	6.464	4.473	0.01402
UBTF	-1.23	-0.299	8.196	-4.472	0.01402
ZFYVE26	1.303	0.3823	7.459	4.47	0.01405
ACO1	-1.696	-0.762	6.816	-4.461	0.01423
ATP1B3	-1.696	-0.7617	7.535	-4.462	0.01423
GCNT4	1.421	0.5072	6.856	4.453	0.01447
SLFN12	1.361	0.4449	7.156	4.44	0.01481
RPL35A	-1.172	-0.2288	10.25	-4.441	0.01481
ADGRF4	-1.585	-0.6649	5.701	-4.43	0.01506
MAP2K6	1.444	0.5301	6.943	4.431	0.01506
NT5E	2.287	1.193	6.632	4.42	0.01533
VNN2	1.64	0.7139	6.775	4.421	0.01533
S100A7A	2.29	1.195	4.535	4.406	0.01577
TLE4	1.222	0.2897	9.17	4.405	0.01577
FMR1	1.204	0.2674	8.681	4.4	0.0159
MMAA	1.51	0.5943	7.714	4.398	0.01594
HESX1	1.992	0.9943	5.519	4.397	0.01594
MTURN	-1.389	-0.4745	7.175	-4.383	0.01637
FYTTD1	1.283	0.3597	8.373	4.383	0.01637
AMBRA1	1.256	0.3288	9.06	4.381	0.0164
HYOU1	1.21	0.2752	8.616	4.37	0.01676
AQP3	-1.163	-0.2179	10.66	-4.366	0.01685
FAM3B	-1.65	-0.7227	6.286	-4.365	0.01685
RPL5	-1.239	-0.3093	10.62	-4.364	0.01685
RPS6	-1.257	-0.3301	10.43	-4.355	0.01714
PALLD	-1.174	-0.2319	9.576	-4.343	0.01742
PRKD2	1.368	0.4523	8.611	4.344	0.01742
IL2RG	2.203	1.14	7.589	4.343	0.01742
DIRC2	-1.258	-0.3311	8.823	-4.345	0.01742
LGMN	1.541	0.6242	8.993	4.337	0.01762
CEBPD	1.461	0.5471	6.876	4.335	0.01763
MOCOS	1.28	0.356	8.425	4.335	0.01763
PPARGC1A	-1.385	-0.4704	7.895	-4.332	0.01768
PHACTR4	1.391	0.4758	8.998	4.331	0.01768
PLEK2	1.563	0.6441	7.926	4.316	0.01823
CXCL5	3.719	1.895	6.942	4.312	0.01838
SESN3	-1.917	-0.939	5.53	-4.31	0.01842
NLRC5	1.854	0.891	5.371	4.307	0.0185
CTSH	-1.244	-0.3152	9.455	-4.291	0.01912
CDC42EP1	1.643	0.716	7.842	4.28	0.01954
HLA-L	1.418	0.5038	6.669	4.275	0.01962
MMP1	-1.787	-0.8377	5.403	-4.277	0.01962
PLEKHA4	1.4	0.485	5.95	4.275	0.01962
IFNL1	2.878	1.525	6.121	4.264	0.02009
TENM2	-1.482	-0.5676	7.006	-4.259	0.02024
NACA	-1.237	-0.307	10.2	-4.257	0.02027
TCF4	1.165	0.2201	9.521	4.248	0.02064
OR52N4	1.884	0.9134	4.717	4.243	0.02086
ACP2	1.507	0.5914	8.975	4.239	0.02096
MOB3C	1.574	0.6543	6.983	4.235	0.0211
HNF4G	1.329	0.4107	7.331	4.234	0.0211
GPC2	-1.568	-0.6491	3.244	-4.224	0.02154
SYT11	-1.933	-0.9507	4.111	-4.222	0.02155
ASAH2B	1.551	0.6332	7.337	4.222	0.02155
TNFRSF14-AS1	1.299	0.3772	7.391	4.211	0.02189
KRT40	1.574	0.6549	5.425	4.21	0.02189
CTSK	-1.422	-0.5075	5.41	-4.213	0.02189
GLRX	1.352	0.4354	9.024	4.213	0.02189
FAM3D	1.302	0.3808	7.85	4.207	0.02199
CTSS	1.182	0.2416	10.9	4.204	0.02206
HOMER2	-1.299	-0.377	8.644	-4.204	0.02206
ECHDC2	-1.286	-0.3623	8.71	-4.2	0.02219
HDX	1.61	0.6871	5.868	4.194	0.02243
PPL	-1.205	-0.2696	8.75	-4.191	0.02252
PZP	-1.396	-0.4815	9.427	-4.19	0.02253
ZNHIT1	-1.214	-0.2795	8.314	-4.184	0.02277
MICB	1.882	0.9121	6.303	4.182	0.02284
NFKB2	1.672	0.7419	8.016	4.174	0.02319
DYNC2H1	-1.696	-0.7625	8.357	-4.168	0.02347
C16orf70	1.417	0.5027	8.996	4.14	0.02496
HLA-DPA1	1.573	0.6539	9.732	4.134	0.02523
WDFY1	1.295	0.3729	8.743	4.124	0.02578
NAMPT	1.367	0.4515	8.217	4.113	0.02627
MTHFD2	1.336	0.418	8.031	4.113	0.02627
HDAC9	1.496	0.5815	8.353	4.113	0.02627
VWA5A	1.233	0.302	9.567	4.109	0.02633
CXCL9	1.864	0.8986	4.418	4.11	0.02633
TTC38	1.38	0.4645	6.94	4.108	0.02633
MCOLN3	-1.524	-0.6075	3.202	-4.104	0.02653
ABHD2	-1.215	-0.2813	10.6	-4.102	0.02655
ABLIM1	-1.304	-0.383	11.08	-4.102	0.02655
EDIL3	-1.963	-0.9732	3.82	-4.097	0.02675
AHNAK	-1.582	-0.662	7.56	-4.093	0.02693
PTPN13	-1.233	-0.3023	8.469	-4.092	0.02696
RPS21	-1.181	-0.2399	10.86	-4.09	0.02698
TACC2	-1.252	-0.3241	8.651	-4.087	0.02713
EDAR	-1.599	-0.6774	3.7	-4.082	0.02737
AIM2	1.97	0.9781	5.078	4.079	0.02748
AEBP2	-1.195	-0.2565	9.234	-4.068	0.02816
ENAH	-1.375	-0.4599	10.29	-4.057	0.02882
TRIM55	1.676	0.7453	3.502	4.054	0.02896
TMEM173	1.188	0.249	10.71	4.051	0.02907
TRAPPC5	1.335	0.4164	8.55	4.047	0.02926
VILL	-1.269	-0.3442	7.73	-4.041	0.02962
TMEM171	2.617	1.388	6.357	4.039	0.02967
PSTPIP2	1.937	0.9542	6.735	4.031	0.03013
IGFBP4	1.321	0.4019	7.474	4.027	0.03031
KLF4	1.34	0.4226	7.234	4.027	0.03031
TJP3	1.183	0.242	9.212	4.024	0.03044
CYBA	1.228	0.2966	9.311	4.015	0.03079
LCE2C	-1.491	-0.5766	3.548	-4.015	0.03079
NFKBIZ	1.414	0.4999	9.138	4.016	0.03079
SLC16A1	1.544	0.627	6.856	4.015	0.03079
BMP4	-1.176	-0.2335	8.932	-4.011	0.0309
CSRNP3	-1.564	-0.6448	4.115	-4.011	0.0309
CGNL1	1.66	0.7311	4.926	4.01	0.0309
SPDEF	1.596	0.6747	7.468	4.006	0.03098
ST14	1.168	0.2238	10.96	4.006	0.03098
SH3TC2	1.838	0.8781	6.574	4.006	0.03098
METTL4	1.326	0.4068	7.147	4.004	0.03105
AGAP3	-1.195	-0.2574	8.485	-3.998	0.03137
B3GNT7	1.152	0.2044	9.978	3.998	0.03137
ATP8B2	1.464	0.5499	5.415	3.996	0.03145
LOC105378699	1.491	0.5767	5.538	3.993	0.03158
PERP	-1.188	-0.2481	10.74	-3.989	0.03182
SLC4A7	-1.329	-0.4107	6.598	-3.987	0.03184
PDE4D	1.452	0.5378	7.109	3.984	0.03203
MDK	1.541	0.6241	9.725	3.983	0.03206
LINC02370	-1.465	-0.5512	4.034	-3.981	0.03211
IL1B	2.552	1.352	7.204	3.976	0.03238
SPTAN1	-1.288	-0.3654	9.239	-3.974	0.03238
SLC16A4	1.787	0.8373	6.776	3.975	0.03238
RRM1	-1.257	-0.3297	7.92	-3.972	0.03249
NCF2	-1.159	-0.2131	8.76	-3.97	0.03253
B2M	1.228	0.2969	11.82	3.97	0.03253
GPR180	1.396	0.4813	6.468	3.964	0.03281
ATP10A	1.551	0.6328	5.914	3.964	0.03281
IP6K3	-1.404	-0.4896	6.998	-3.961	0.03294
COPZ2	-1.498	-0.5828	4.72	-3.958	0.03308
MPP4	-1.505	-0.5899	4.116	-3.953	0.03342
WNK1	-1.367	-0.4512	8.52	-3.952	0.03345
MMD	1.522	0.6064	5.957	3.948	0.03363
OR51B5	1.71	0.7736	4.129	3.947	0.03364
SULF2	-1.306	-0.385	9.439	-3.946	0.03366
CLTCL1	-1.63	-0.7053	5.804	-3.945	0.03369
ANTXR2	1.582	0.6621	7.047	3.941	0.03387
HCAR3	1.471	0.5572	6.496	3.941	0.03387
STK17A	-1.198	-0.2604	8.319	-3.937	0.0341
BICD2	-1.432	-0.5182	7.005	-3.935	0.03415
TCF25	-1.194	-0.2553	9.526	-3.934	0.0342
PPM1J	1.971	0.979	4.675	3.931	0.03436
SORL1	-1.531	-0.614	6.501	-3.928	0.03455
SDHB	-1.226	-0.2938	8.675	-3.926	0.03459
DAB2IP	1.266	0.34	7.736	3.923	0.0348
OGFR	1.249	0.3203	8.793	3.918	0.03506
TMX1	1.199	0.2615	8.83	3.918	0.03506
GLS	-1.7	-0.7659	6.259	-3.909	0.0357
SLC37A2	-1.315	-0.3945	7.254	-3.907	0.03572
BCL2L15	2.063	1.045	6.539	3.907	0.03572
TRAFD1	1.32	0.4006	8.783	3.902	0.03604
TNS4	-1.225	-0.293	9.36	-3.897	0.0364
ACAT2	1.352	0.4352	7.152	3.893	0.03656
ATP13A1	1.154	0.2063	9.691	3.893	0.03656
RPS24	-1.16	-0.2137	11.09	-3.889	0.03687
PRKAR2B	1.662	0.7327	6.105	3.886	0.03702
C19orf54	1.376	0.4603	6.355	3.88	0.03741
PARP3	1.403	0.489	7.714	3.876	0.03753
HLA-DRA	1.202	0.265	11.72	3.877	0.03753
MPDU1	1.16	0.2139	10.65	3.877	0.03753
TNS3	1.443	0.5292	6.463	3.873	0.03776
MASTL	1.496	0.5812	5.268	3.869	0.03802
MYL6	-1.18	-0.2394	10.72	-3.867	0.03814
GOSR1	1.192	0.2535	10.23	3.865	0.03818
IRAK2	1.977	0.9835	5.477	3.862	0.03837
MRPS31	-1.379	-0.4634	6.649	-3.859	0.03846
LIPK	-1.556	-0.6376	2.624	-3.859	0.03846
IL32	1.937	0.954	8.846	3.86	0.03846
ACOT8	-1.224	-0.2916	7.893	-3.857	0.03851
FAM184A	-1.712	-0.7755	4.689	-3.853	0.03878
RAB26	-1.418	-0.5041	6.453	-3.85	0.03888
LIPA	1.252	0.3238	8.884	3.85	0.03888
CD47	1.275	0.3501	9.211	3.851	0.03888
SLC18B1	1.255	0.3281	9.041	3.848	0.03889
LAMA1	1.629	0.704	5.001	3.847	0.03889
ZCCHC2	1.366	0.4504	7.171	3.847	0.03889
MAP3K4	-1.426	-0.5116	6.696	-3.84	0.03948
CD109	-1.357	-0.4409	6.176	-3.833	0.03987
SLC7A11	1.388	0.4735	7.273	3.831	0.03987
MATN2	-1.703	-0.7681	6.957	-3.833	0.03987
PRKACA	-1.264	-0.3377	8.236	-3.833	0.03987
MED25	1.137	0.1858	9.328	3.831	0.03987
BLZF1	1.406	0.4914	8.94	3.83	0.03987
PPP2R3A	-1.34	-0.4218	5.938	-3.824	0.0404
AHNAK2	-1.397	-0.4826	10.82	-3.82	0.04053
SNX20	1.386	0.4712	3.835	3.82	0.04053
FAM122C	1.238	0.3083	8.04	3.821	0.04053
FAM172A	-1.386	-0.4707	7.562	-3.819	0.04053
TNIP1	1.364	0.4477	8.586	3.814	0.04089
MIR205HG	-1.245	-0.3161	9.199	-3.811	0.04112
MYH10	-1.175	-0.2324	9.307	-3.81	0.04114
ACY3	1.504	0.5891	6.156	3.802	0.04183
TMEM37	-1.424	-0.5097	7.556	-3.796	0.04226
KCNJ2	1.393	0.4782	6.781	3.796	0.04226
IL6	2.794	1.483	5.88	3.794	0.04236
RBCK1	1.283	0.3592	7.31	3.791	0.04256
DRAP1	1.276	0.3514	7.765	3.788	0.04277
VTCN1	-1.34	-0.4227	8.165	-3.787	0.04283
C21orf91	1.416	0.5015	8.164	3.785	0.04288
MOV10	1.357	0.4406	8.132	3.784	0.04295
CD44	-1.347	-0.4292	8.802	-3.777	0.0435
GPATCH11	-1.271	-0.3459	6.849	-3.776	0.04354
ARPC1A	-1.21	-0.2755	9.853	-3.773	0.04374
STARD4	1.419	0.5047	6.892	3.77	0.04399
CCDC80	-1.266	-0.3401	10.18	-3.769	0.04399
AKAP9	-1.303	-0.3821	8.988	-3.766	0.0442
L3MBTL2	1.22	0.2871	8.361	3.762	0.04451
FBXO7	1.172	0.2295	9.855	3.762	0.04452
COLEC10	-1.4	-0.4855	4.552	-3.76	0.04457
SNRNP70	-1.154	-0.2071	9.176	-3.759	0.04457
ALS2CL	-1.314	-0.3936	7.949	-3.755	0.04491
AKAP3	1.328	0.4088	6.727	3.753	0.04507
KRT39	1.994	0.996	4.56	3.745	0.04585
DYNC1H1	-1.42	-0.5059	9.03	-3.743	0.04588
TEK	-1.406	-0.4918	2.815	-3.743	0.04588
GJA1	-1.818	-0.8625	7.61	-3.741	0.04598
EEF2	-1.196	-0.2587	11.38	-3.739	0.04611
DSC3	-1.453	-0.5393	7.246	-3.738	0.04617
DSP	-1.251	-0.3235	9.984	-3.734	0.04651
SERPINE2	-1.484	-0.5692	7.389	-3.731	0.04661
SP140L	1.345	0.4277	6.973	3.731	0.04661
RBM38	1.18	0.2392	9.228	3.728	0.04687
C4orf33	1.331	0.4128	7.044	3.723	0.04728
CCDC187	-1.298	-0.3758	7.385	-3.723	0.04729
GOLIM4	-1.332	-0.4132	6.4	-3.719	0.04761
LOC155060	-1.45	-0.5363	6.093	-3.716	0.04787
KIAA0040	1.319	0.3993	8.226	3.713	0.04809
BAK1	1.451	0.5373	8.439	3.711	0.04818
SLC16A3	1.188	0.2481	9.468	3.711	0.04818
DCK	1.368	0.4524	6.201	3.703	0.0488
SBNO2	1.248	0.3193	9.639	3.704	0.0488
CD74	1.163	0.2184	12.16	3.702	0.04891
ODF3B	1.198	0.2607	9.966	3.697	0.04936
SLC6A14	1.516	0.6005	9.821	3.692	0.04988
DNPEP	1.297	0.3748	8.244	3.688	0.05017
ATP6V1C2	-1.306	-0.3853	8.131	-3.686	0.05035
LSR	1.362	0.4457	9.382	3.68	0.05084
CNDP2	1.138	0.1866	11.2	3.68	0.05084
RPL35	-1.178	-0.2359	10.54	-3.678	0.05091
PRAMEF2	1.493	0.578	2.885	3.678	0.05091
IGFL2	-1.54	-0.6225	4.447	-3.675	0.05107
ERAP1	1.19	0.2508	8.821	3.676	0.05107
MCFD2	1.231	0.2993	8.393	3.673	0.05122
CALML3	-1.55	-0.6322	4.937	-3.668	0.05178
MAGED1	-1.227	-0.2948	8.885	-3.667	0.05178
WNT2B	-1.861	-0.8961	3.927	-3.66	0.0525
TTC39B	1.296	0.3743	7.053	3.658	0.05262
TMPRSS15	1.27	0.345	2.487	3.655	0.05286
RPS11	-1.157	-0.2109	11.22	-3.655	0.05286
RBM17	-1.232	-0.3007	7.954	-3.651	0.05319
AHI1	-1.338	-0.42	7.79	-3.65	0.05323
ATP5F1	-1.229	-0.2973	9.521	-3.646	0.05366
EMD	-1.302	-0.3807	8.013	-3.638	0.054
EPHB6	-1.406	-0.4912	4.344	-3.64	0.054
MAFF	1.488	0.5733	7.205	3.641	0.054
IFNL3	1.892	0.9201	6.458	3.637	0.054
RWDD1	-1.281	-0.3574	6.972	-3.638	0.054
COA1	-1.224	-0.2921	8.881	-3.64	0.054
TBC1D14	-1.187	-0.247	8.792	-3.638	0.054
RELA	1.186	0.2459	9.124	3.642	0.054
ERP44	1.171	0.2276	8.701	3.634	0.05428
ITGB6	-1.238	-0.3081	7.515	-3.633	0.05432
PARP11	1.246	0.3171	6.905	3.632	0.05436
KCNN3	1.39	0.4755	6.033	3.631	0.05438
CR1L	1.662	0.7333	6.523	3.63	0.05442
BCL2A1	2.562	1.357	5.35	3.63	0.05442
GRAMD2B	1.303	0.3817	8.265	3.628	0.05451
ANKRD35	-1.421	-0.507	6.412	-3.622	0.055
ZNF567	1.304	0.3831	6.715	3.62	0.055
GSDME	-1.654	-0.7263	4.628	-3.62	0.055
RPL15	-1.152	-0.2037	11.38	-3.622	0.055
APOL3	1.536	0.6194	6.467	3.623	0.055
SPTLC2	1.169	0.2255	9.288	3.621	0.055
RAB27B	1.348	0.4306	7.457	3.617	0.05525
FGD4	-1.342	-0.4244	7.702	-3.61	0.05586
JADE2	1.403	0.4887	7.928	3.61	0.05586
SLC11A2	1.489	0.5743	8.083	3.611	0.05586
BRIP1	2.149	1.104	4.798	3.611	0.05586
MFSD12	1.243	0.314	7.843	3.606	0.05598
PNKD	1.411	0.4969	7.625	3.607	0.05598
ITSN1	-1.26	-0.3335	7.498	-3.607	0.05598
RCN1	1.273	0.3485	8.446	3.604	0.05614
IQGAP1	-1.2	-0.2625	9.682	-3.604	0.05614
SMARCC1	-1.187	-0.2477	8.269	-3.6	0.05658
SPON2	-1.301	-0.3794	7.687	-3.597	0.05678
CARHSP1	1.303	0.3818	7.129	3.597	0.05678
RPL23	-1.219	-0.2853	10.31	-3.596	0.0568
LOC100287036	-1.406	-0.4916	3.323	-3.594	0.0569
FBXO39	1.522	0.6058	5.241	3.591	0.05729
GNA14	1.227	0.2957	8.43	3.59	0.05732
ICAM1	1.686	0.754	8.645	3.584	0.05798
DBN1	-1.391	-0.4762	6.879	-3.579	0.05817
LMO2	1.347	0.4299	7.785	3.578	0.05817
PYGL	-1.196	-0.2576	8.568	-3.58	0.05817
RPS20	-1.15	-0.2017	10.84	-3.581	0.05817
STAG3L4	-1.271	-0.3458	6.858	-3.581	0.05817
TTC3	-1.294	-0.3721	9.219	-3.58	0.05817
CYP17A1	-1.341	-0.4233	3.14	-3.575	0.05853
FYB1	1.815	0.8603	6.49	3.573	0.05875
SLC5A1	1.622	0.6979	5.177	3.572	0.05877
ZFHX3	-1.354	-0.4371	7.134	-3.571	0.05878
INTS12	1.248	0.32	8.417	3.57	0.05882
CYSLTR1	1.531	0.6148	5.338	3.561	0.05989
LTBR	-1.205	-0.2696	8.033	-3.561	0.05989
MRPL17	1.194	0.2563	9.001	3.559	0.06001
TMEM106A	1.611	0.6879	6.711	3.558	0.06004
SAMHD1	1.142	0.1916	11.35	3.554	0.0604
IL17C	1.744	0.802	6.148	3.555	0.0604
UROS	-1.257	-0.3297	7.767	-3.554	0.0604
ARHGAP40	1.541	0.6236	4.546	3.552	0.06049
LPAR1	1.221	0.2877	7.521	3.551	0.06062
IL1RN	1.67	0.7395	9.676	3.548	0.06092
FUNDC1	-1.293	-0.3712	6.621	-3.544	0.06122
NDUFA13	-1.229	-0.298	7.754	-3.544	0.06122
RPL27	-1.155	-0.2083	8.833	-3.544	0.06122
MKX	1.324	0.4048	6.561	3.542	0.06141
PTBP2	-1.287	-0.3639	6.463	-3.54	0.06163
BCL2L10	-1.486	-0.5713	4.381	-3.537	0.06182
RNF128	-1.579	-0.6586	5.69	-3.537	0.06182
SPRR2F	2.386	1.254	6.757	3.532	0.06241
CD40	1.254	0.3263	7.512	3.526	0.06319
DTNA	-1.409	-0.4952	7.026	-3.525	0.0632
STMN1	-1.284	-0.3608	6.398	-3.521	0.06367
USP25	1.188	0.2487	8.071	3.515	0.06436
ANKRD50	-1.225	-0.2926	7.997	-3.516	0.06436
USP17L10	-1.482	-0.568	4.155	-3.509	0.06514
HSPA4L	-1.343	-0.4253	8.364	-3.507	0.06532
AGR2	1.215	0.2807	9.043	3.506	0.06533
BLOC1S3	1.314	0.3945	7.216	3.506	0.06533
TRPC6	-1.414	-0.4998	3.341	-3.505	0.0654
KRT4	-1.592	-0.6709	9.889	-3.504	0.06547
RPS4X	-1.205	-0.2688	11.77	-3.503	0.06547
HSP90B1	1.122	0.1662	11.06	3.5	0.06581
KCNN4	-1.457	-0.5429	5.405	-3.498	0.06596
PLXNB3	-1.409	-0.4943	5.525	-3.498	0.06596
NAA30	1.202	0.266	7.176	3.49	0.06679
KRT23	1.458	0.5439	8.371	3.489	0.06679
SUMF1	-1.254	-0.3262	6.427	-3.489	0.06679
C5orf56	1.606	0.6833	6.119	3.49	0.06679
IER3	1.426	0.512	9.589	3.49	0.06679
R3HDM2	-1.207	-0.271	8.447	-3.486	0.06709
MFAP2	-1.338	-0.4198	6.895	-3.485	0.06709
SH3RF1	-1.224	-0.2915	8.866	-3.485	0.06709
ZNF185	-1.309	-0.389	7.784	-3.486	0.06709
TEX26	-1.204	-0.2675	9.303	-3.48	0.06737
PAQR3	-1.198	-0.2601	7.772	-3.481	0.06737
SRFBP1	1.193	0.2543	8.284	3.482	0.06737
USF1	1.318	0.3985	7.664	3.48	0.06737
TRERF1	-1.205	-0.2694	8.437	-3.479	0.06747
ADAM8	1.628	0.7034	5.618	3.477	0.06768
USP48	-1.191	-0.2524	8.047	-3.476	0.06768
MTNR1A	1.667	0.7371	6.255	3.475	0.06769
IL33	1.569	0.6495	4.882	3.475	0.06769
PDZD2	1.258	0.3316	6.823	3.473	0.06789
FCGBP	1.417	0.503	5.454	3.471	0.06804
DSTN	-1.235	-0.3046	9.931	-3.469	0.06836
LINC01620	1.287	0.3637	2.343	3.468	0.06842
DAPP1	1.258	0.3315	8.623	3.466	0.0685
ZNF860	-1.362	-0.4455	5.826	-3.465	0.0685
TXNDC11	1.306	0.3852	9.257	3.465	0.0685
ARFGAP1	1.159	0.2124	9.102	3.466	0.0685
NRBP2	-1.303	-0.3818	6.521	-3.457	0.06944
MAN1C1	-1.764	-0.819	6.148	-3.457	0.06944
CYBRD1	-1.372	-0.4568	6.734	-3.458	0.06944
PLA2R1	-1.359	-0.4421	6.45	-3.454	0.06972
HSPA2	-1.412	-0.4976	8.13	-3.453	0.06982
ZNF358	1.211	0.2766	7.181	3.448	0.07047
ATXN2	-1.141	-0.1908	10.75	-3.447	0.07057
NAV1	-1.25	-0.3224	7.659	-3.446	0.07063
NCAPH	-1.638	-0.7121	4.904	-3.445	0.07067
SLC25A27	-1.416	-0.5021	5.976	-3.445	0.07067
FAM213B	1.156	0.2086	8.465	3.443	0.07079
CEACAM5	1.357	0.4408	11.1	3.442	0.07089
RAB7B	-1.484	-0.5696	6.461	-3.441	0.07089
AP4E1	-1.342	-0.4244	5.762	-3.436	0.07159
MYOF	-1.163	-0.2173	9.789	-3.425	0.07342
MXRA5	-1.401	-0.4863	5.047	-3.419	0.07433
PRRX2	1.429	0.5149	5.755	3.416	0.07471
ZNF618	1.584	0.6637	6.193	3.412	0.07511
SERTAD1	1.345	0.428	7.202	3.413	0.07511
FNDC3A	1.272	0.347	8.205	3.412	0.07512
SLC2A1	-1.142	-0.1921	10.73	-3.409	0.07551
LAMP1	-1.183	-0.2423	9.022	-3.404	0.07614
EGFR	-1.295	-0.3725	7.681	-3.402	0.0764
ZNF395	-1.27	-0.3453	6.458	-3.402	0.0764
C5orf42	-1.455	-0.5413	8.199	-3.399	0.07677
CMYA5	1.36	0.4438	4.817	3.398	0.0768
RNF19A	1.313	0.393	7.225	3.397	0.07681
PLCXD1	1.357	0.4399	4.89	3.394	0.07725
BATF	1.473	0.5588	6.208	3.393	0.07731
CCL28	1.433	0.5191	8.427	3.393	0.07735
REPIN1	1.308	0.3874	7.13	3.39	0.07761
ANKRD40	1.226	0.2935	7.216	3.389	0.07777
CENPC	-1.336	-0.4177	6.407	-3.387	0.07793
C11orf88	-1.283	-0.3594	9.171	-3.386	0.07817
HECTD1	-1.239	-0.3095	9.269	-3.383	0.07823
FBXO42	-1.278	-0.3538	6.877	-3.383	0.07823
PLEKHA2	1.311	0.3902	7.349	3.384	0.07823
RPL18	-1.118	-0.1609	11.4	-3.383	0.07823
CEACAM7	2.015	1.011	5.144	3.38	0.07867
MAP3K8	1.393	0.4777	8.601	3.378	0.07886
MAFA	1.472	0.5581	4.211	3.377	0.07886
PTAFR	1.44	0.5259	8.43	3.377	0.07886
GORASP1	1.179	0.237	8.223	3.375	0.07908
KHNYN	1.201	0.264	7.805	3.373	0.07917
ITGB2	1.674	0.7429	5.204	3.374	0.07917
VPS13D	-1.353	-0.4359	6.559	-3.372	0.07937
DEGS1	1.342	0.4239	6.795	3.369	0.07973
DCAF8	-1.202	-0.2658	7.663	-3.367	0.07995
RPS14	-1.238	-0.3083	8.662	-3.367	0.07995
CHD3	-1.309	-0.3883	7.811	-3.36	0.08088
GRK2	1.219	0.2856	7.875	3.36	0.08088
USMG5	-1.146	-0.1968	9.584	-3.36	0.08088
ALOX5AP	1.705	0.7696	4.614	3.359	0.08093
RPS25	-1.133	-0.1805	10.85	-3.358	0.08093
TPRA1	1.212	0.2768	9.155	3.354	0.08128
DDX10	1.502	0.5871	5.35	3.355	0.08128
MPV17L	1.211	0.2759	7.446	3.354	0.08128
RELB	1.478	0.5635	6.786	3.355	0.08128
WNT9A	-1.405	-0.4901	7.138	-3.353	0.08135
ELOVL7	1.586	0.665	5.312	3.35	0.0819
TRHR	1.347	0.4301	3.117	3.348	0.08201
ALG12	1.231	0.2997	7.241	3.347	0.08214
CHAC1	1.557	0.6385	8.388	3.346	0.08217
MIA3	1.158	0.2119	8.55	3.346	0.0822
CCDC93	-1.218	-0.2843	7.283	-3.344	0.0823
TNIP3	2.013	1.01	4.776	3.342	0.08259
PKIG	-1.238	-0.3075	8.686	-3.34	0.08287
ANAPC16	-1.128	-0.1735	9.456	-3.34	0.08287
CGAS	1.653	0.7248	5.263	3.338	0.08304
SOSTDC1	-1.488	-0.5737	5.351	-3.338	0.08304
C1R	1.815	0.8599	5.452	3.336	0.08332
MCM2	1.27	0.3448	6.281	3.334	0.08343
CBY1	-1.267	-0.3417	8.544	-3.333	0.08356
MYO9A	-1.308	-0.3876	7.051	-3.332	0.08361
SPRR2E	2.244	1.166	7.788	3.331	0.08369
PPIH	-1.28	-0.3566	6.485	-3.33	0.08388
HBEGF	1.907	0.9314	6.269	3.328	0.08403
UBR3	-1.291	-0.3688	7.836	-3.327	0.08411
ASAP3	-1.335	-0.417	7.556	-3.327	0.08411
MTCH1	-1.141	-0.1905	9.27	-3.326	0.08412
CDC42P6	-1.148	-0.1985	9.678	-3.313	0.08647
LAPTM5	1.872	0.9046	7.697	3.313	0.08647
NDUFS4	-1.176	-0.2338	7.782	-3.309	0.08709
LOC644215	-1.776	-0.8286	4.871	-3.305	0.08773
PC	-1.322	-0.4023	5.75	-3.304	0.08784
GMFG	1.533	0.6162	2.611	3.303	0.08796
FAM83A	1.446	0.5317	9.407	3.299	0.08858
ARID2	-1.235	-0.3045	7.508	-3.298	0.08875
CASP4	1.138	0.1868	10.28	3.297	0.08875
NME6	1.177	0.2356	7.694	3.297	0.08883
TAPBPL	1.3	0.3785	9.403	3.295	0.0889
RPL9	-1.171	-0.2277	10.07	-3.295	0.0889
PRDM1	1.557	0.639	8.371	3.294	0.0889
STRIP1	-1.164	-0.2195	8.263	-3.293	0.08898
TRAF3IP2	1.263	0.3373	8.013	3.292	0.08911
AQP7	-1.397	-0.4824	6.723	-3.291	0.08911
TKT	-1.227	-0.2953	9.572	-3.291	0.08911
SPAG9	-1.21	-0.2751	7.663	-3.292	0.08911
KIAA0825	-1.325	-0.4062	7.921	-3.284	0.09038
MIPOL1	-1.327	-0.408	6.191	-3.282	0.09055
RPS23	-1.192	-0.2535	9.968	-3.277	0.09164
ARAP1	-1.298	-0.3768	6.348	-3.275	0.09179
TMCC2	-1.846	-0.8845	5.855	-3.275	0.09179
IGSF3	-1.278	-0.3544	6.725	-3.273	0.09197
KIF1C	-1.264	-0.3383	7.415	-3.273	0.092
NMT2	-1.29	-0.3674	5.891	-3.271	0.09225
RPS3	-1.205	-0.2689	10.04	-3.27	0.09228
MT1L	-1.291	-0.3685	10.33	-3.268	0.09236
WBP1L	-1.184	-0.2441	9.751	-3.267	0.09236
NPLOC4	1.147	0.1982	8.634	3.266	0.09236
VEGFC	1.541	0.6241	6.821	3.269	0.09236
C11orf68	1.27	0.3453	7.465	3.267	0.09236
NUDCD1	1.238	0.3079	7.095	3.267	0.09236
TSHZ2	-1.238	-0.3085	8.934	-3.265	0.09254
ANXA2	-1.114	-0.1555	12.21	-3.263	0.09273
TRPM7	-1.293	-0.3709	6.648	-3.263	0.09273
PPARG	-1.346	-0.4289	4.472	-3.262	0.09277
MYL9	-1.373	-0.4572	9.409	-3.261	0.09278
OLFML2A	-1.298	-0.3763	6.698	-3.262	0.09278
DPF2	1.171	0.2283	9.271	3.26	0.09278
CALCB	-1.398	-0.4837	3.918	-3.26	0.09278
LRP4	-1.452	-0.5379	4.77	-3.26	0.09279
PP2D1	-1.369	-0.4531	4.351	-3.254	0.09369
ETV6	1.126	0.1718	10.17	3.254	0.09369
FRK	1.161	0.2149	9.112	3.253	0.09375
KIAA1211	-1.307	-0.3857	3.918	-3.252	0.09395
TNNC1	-1.398	-0.4839	7.276	-3.251	0.09412
ZNF354B	-1.423	-0.5085	5.465	-3.25	0.09418
S100A9	1.23	0.2986	10.98	3.243	0.09537
SRSF11	-1.191	-0.2517	8.883	-3.243	0.09537
TAGAP	1.424	0.5099	6.426	3.241	0.09563
OR4C12	-1.604	-0.6813	2.827	-3.241	0.09563
PRB1	-1.824	-0.8675	5.249	-3.24	0.09572
AKAP13	-1.301	-0.3795	7.928	-3.238	0.09584
CLU	-1.293	-0.3708	9.112	-3.238	0.09584
SLC16A12	-1.716	-0.779	3.815	-3.238	0.09584
ZNF365	-1.397	-0.4825	5.892	-3.235	0.0963
POLR3D	1.293	0.371	6.961	3.235	0.0963
BBC3	1.591	0.6702	5.75	3.233	0.0966
DDIT4L	1.374	0.4581	7.027	3.23	0.09705
RMI1	1.243	0.3143	7.295	3.228	0.09738
FAM206A	1.164	0.2193	8.454	3.226	0.0976
LIN37	1.194	0.2557	7.703	3.226	0.0976
PRICKLE4	1.382	0.4673	6.522	3.224	0.09794
H6PD	1.182	0.2418	8.483	3.223	0.09805
OR8I2	1.5	0.5847	2.326	3.221	0.09829
RIPK3	1.34	0.422	6.578	3.22	0.09847
SLC34A2	1.196	0.2587	11.23	3.219	0.09862
SLC13A5	1.503	0.588	7.145	3.213	0.09948
OR1L6	1.438	0.5236	3.645	3.214	0.09948
KCNK5	-1.309	-0.3886	6.639	-3.214	0.09948
BACE2	1.14	0.1896	8.591	3.211	0.09972
CXCL17	1.111	0.1519	11.71	3.211	0.09972
GTF2IRD1	-1.172	-0.2296	8.321	-3.21	0.09994
CEBPE	1.316	0.3964	3.384	3.208	0.1001
FANCA	-1.513	-0.5975	3.986	-3.207	0.1001
GSN	-1.162	-0.2162	8.911	-3.208	0.1001
SLC9A9	-1.384	-0.4693	5.531	-3.205	0.1005
C15orf48	2.559	1.355	6.637	3.205	0.1005
CCAR1	-1.181	-0.2395	8.293	-3.203	0.1006
SIPA1	-1.435	-0.521	4.62	-3.203	0.1006
MGAM	1.433	0.5195	6.684	3.203	0.1006
GDA	1.205	0.2688	9.16	3.202	0.1006
ODF1	1.412	0.4977	2.924	3.2	0.1007
STK10	1.235	0.3049	7.189	3.199	0.1007
TGFB2	-1.236	-0.3058	9.683	-3.198	0.1007
WFS1	-1.37	-0.4543	7.493	-3.199	0.1007
CALD1	-1.389	-0.4745	7.577	-3.199	0.1007
WWC2	-1.292	-0.3692	5.705	-3.198	0.1007
CCDC114	-1.214	-0.2801	10.36	-3.2	0.1007
MANF	1.287	0.3644	6.613	3.196	0.101
REC8	1.214	0.2796	9.17	3.194	0.1014
HES4	1.281	0.3576	6.78	3.191	0.1019
QARS	-1.169	-0.225	8.805	-3.19	0.1021
APPL1	-1.271	-0.346	6.857	-3.184	0.103
APTX	-1.244	-0.3151	6.431	-3.185	0.103
CD36	-1.613	-0.6899	7.886	-3.185	0.103
RDH5	-1.462	-0.5483	5.352	-3.178	0.1043
SGPP2	1.139	0.1877	9.481	3.172	0.1049
UNC5B	-1.376	-0.4603	7.741	-3.174	0.1049
CLIC4	1.277	0.3527	9.143	3.175	0.1049
AMELX	1.431	0.5172	4.776	3.174	0.1049
BLACE	-1.339	-0.4212	3.535	-3.172	0.1049
BCL9	-1.2	-0.2631	8.035	-3.174	0.1049
EIF3F	-1.175	-0.2333	8.671	-3.172	0.1049
QTRT2	1.265	0.339	6.393	3.171	0.105
FLNA	-1.305	-0.3838	7.769	-3.17	0.1052
TRIM56	1.247	0.318	7.55	3.169	0.1053
VPS13B	-1.214	-0.2802	8.331	-3.168	0.1054
HIST2H2BE	1.307	0.3863	9.139	3.168	0.1054
MAB21L2	1.429	0.5148	5.065	3.167	0.1055
CRYAB	-1.649	-0.7218	6.355	-3.163	0.1061
ILDR1	1.154	0.2072	7.492	3.161	0.1061
BRWD1	-1.246	-0.3171	7.767	-3.162	0.1061
TMEM27	1.781	0.8323	5.144	3.162	0.1061
RAD23B	-1.121	-0.1641	10.28	-3.163	0.1061
PTBP3	-1.112	-0.1534	10.52	-3.161	0.1061
C4orf19	1.448	0.5343	7.867	3.16	0.1062
SAP130	1.198	0.2609	8.107	3.158	0.1065
NIN	-1.388	-0.4731	7.506	-3.157	0.1067
VIM	-1.371	-0.4549	8.516	-3.156	0.1069
OBSL1	-1.367	-0.4513	6.571	-3.154	0.1071
ST5	1.135	0.183	8.351	3.153	0.1071
TBX1	1.205	0.2691	6.998	3.154	0.1071
PPP1CA	-1.121	-0.1651	10.47	-3.15	0.1077
SLC30A7	1.165	0.2198	8.054	3.147	0.1083
RPL6	-1.287	-0.3635	9.185	-3.146	0.1083
RPL34	-1.13	-0.1768	11.17	-3.147	0.1083
DPY30	-1.117	-0.159	10.6	-3.147	0.1083
YWHAH	-1.147	-0.1983	9.388	-3.145	0.1084
FAT2	-1.54	-0.6227	7.505	-3.142	0.1085
NINL	-1.339	-0.421	5.94	-3.143	0.1085
MYO6	-1.257	-0.3305	7.916	-3.142	0.1085
GPR143	1.462	0.548	5.707	3.142	0.1085
POMGNT1	-1.265	-0.3389	6.999	-3.144	0.1085
SMTNL1	1.293	0.371	4.942	3.136	0.1095
ADGRL3	-1.393	-0.4782	4.688	-3.135	0.1095
ABCC1	-1.278	-0.3539	8.708	-3.135	0.1095
PLAUR	1.941	0.9568	6.975	3.136	0.1095
CDCA4	-1.236	-0.3058	6.705	-3.138	0.1095
BCAN	1.458	0.5439	3.317	3.135	0.1095
PRSS22	1.302	0.381	9.718	3.135	0.1095
CSTF2	1.249	0.3204	7.152	3.133	0.1096
OSMR	1.275	0.3505	7.682	3.134	0.1096
CERK	-1.328	-0.4092	5.936	-3.131	0.1101
CCL22	1.776	0.8282	4.915	3.13	0.1102
ANTXRL	-1.28	-0.3561	4.572	-3.128	0.1104
SCNN1D	-1.414	-0.4999	4.18	-3.128	0.1104
CATSPERE	-1.465	-0.5511	5.045	-3.125	0.1107
PHF20L1	-1.159	-0.2123	8.066	-3.126	0.1107
PPIB	1.128	0.1734	10.79	3.127	0.1107
TMEM63C	-1.308	-0.3877	6.365	-3.124	0.1111
HTR3E	-1.352	-0.4351	2.792	-3.123	0.1112
TFCP2L1	-1.376	-0.4609	7.527	-3.121	0.1114
MEST	1.359	0.4427	6.461	3.118	0.1118
ATP2A1	-1.506	-0.5906	4.12	-3.118	0.1118
CUBN	-1.872	-0.9044	5.193	-3.118	0.1118
SFXN3	-1.187	-0.2478	9.202	-3.118	0.1119
MEPCE	1.164	0.2193	8.106	3.114	0.1125
PROX1	1.504	0.5893	4.713	3.114	0.1125
KCTD19	1.328	0.4096	2.276	3.113	0.1126
PSG5	-1.416	-0.5018	4.65	-3.111	0.1128
ACOT1	1.496	0.5807	5.041	3.112	0.1128
KIAA1841	-1.238	-0.3077	9.095	-3.111	0.1128
SOGA1	-1.409	-0.4948	5.79	-3.107	0.1136
IRF5	1.362	0.4455	5.505	3.106	0.1136
MRPS21	-1.101	-0.1394	10.98	-3.107	0.1136
RAPGEF5	1.374	0.4581	5.14	3.104	0.114
CD9	-1.124	-0.1687	11.43	-3.103	0.1141
MAPK8IP2	1.408	0.4937	4.325	3.102	0.1142
PLEKHF1	1.234	0.3028	7.654	3.098	0.1153
CREB3	1.142	0.1915	8.724	3.095	0.1159
CHKA	-1.268	-0.3431	8.086	-3.094	0.1159
POM121	-1.151	-0.2025	8.319	-3.093	0.1162
PLXNC1	1.468	0.5542	3.588	3.09	0.1166
MAP3K11	1.173	0.2307	9.056	3.091	0.1166
SLAIN2	-1.102	-0.1404	10.09	-3.089	0.1166
RPL7A	-1.17	-0.2261	10.38	-3.088	0.1166
TNFAIP6	2.075	1.053	4.996	3.088	0.1166
XPNPEP1	1.162	0.2168	9.765	3.089	0.1166
ST3GAL5	1.345	0.4273	5.523	3.089	0.1166
JAML	1.338	0.4199	3.094	3.087	0.1169
EIF4EBP2	-1.138	-0.187	10.19	-3.086	0.1169
RNASE11	-1.37	-0.4538	2.577	-3.084	0.1172
OR2Y1	-1.465	-0.5504	3.153	-3.083	0.1174
DSG1	-1.859	-0.8946	3.875	-3.083	0.1174
MAN1A1	-1.343	-0.425	6.759	-3.082	0.1176
THBS1	1.384	0.4688	9.163	3.081	0.1177
SSRP1	-1.161	-0.2155	8.742	-3.08	0.1178
TNFSF15	1.549	0.6315	4.564	3.078	0.1183
MDH1	-1.214	-0.2792	7.395	-3.076	0.1187
SHANK2	-1.361	-0.4446	7.149	-3.074	0.1188
HADHA	-1.148	-0.1994	9.092	-3.074	0.1188
LCE3C	1.297	0.3747	2.963	3.074	0.1188
PRMT7	1.201	0.2648	7.713	3.073	0.1188
APC	-1.195	-0.2571	8.439	-3.072	0.1191
GPNMB	-1.418	-0.5043	9.454	-3.071	0.1192
TMPRSS3	1.193	0.2549	9.436	3.07	0.1192
SLC7A7	1.376	0.4609	6.624	3.07	0.1193
CTSC	1.352	0.4346	10.2	3.068	0.1195
SUN1	-1.174	-0.2317	9.795	-3.068	0.1195
PFKFB3	-1.279	-0.3546	6.558	-3.068	0.1195
POU2F1	1.17	0.2267	9.355	3.065	0.1201
TMEM136	-1.352	-0.4348	4.779	-3.061	0.1202
TRIM2	-1.148	-0.1992	10.55	-3.061	0.1202
ALPL	1.494	0.5787	6.941	3.061	0.1202
MPHOSPH8	-1.381	-0.4656	5.602	-3.063	0.1202
PTMS	-1.27	-0.3446	7.846	-3.061	0.1202
RPS16	-1.144	-0.1938	11.11	-3.063	0.1202
SRSF5	-1.117	-0.1596	11.3	-3.061	0.1202
PRSS12	-1.261	-0.335	9.774	-3.062	0.1202
PLD2	-1.273	-0.3481	6.723	-3.06	0.1203
PSD4	-1.273	-0.3478	5.099	-3.055	0.1214
SMAD7	-1.277	-0.3533	6.911	-3.053	0.1214
SCNN1G	1.558	0.64	5.567	3.054	0.1214
ZNF165	1.566	0.647	5.487	3.054	0.1214
USP42	1.17	0.2263	8.047	3.055	0.1214
LAMC1	-1.185	-0.2453	8.071	-3.05	0.1221
MICALL1	-1.241	-0.3114	7.381	-3.05	0.1221
FGF17	-1.424	-0.5104	3.791	-3.05	0.1221
EXOC4	-1.178	-0.2366	9.421	-3.048	0.1225
SPATA32	1.345	0.4279	5.555	3.046	0.1228
SMIM5	-1.219	-0.2863	7.515	-3.043	0.1234
TBC1D22A	-1.179	-0.2372	7.628	-3.036	0.1251
MR1	1.255	0.3279	8.507	3.036	0.1251
SCNN1A	-1.118	-0.1608	10.6	-3.035	0.1251
CAMK2G	-1.277	-0.353	6.953	-3.036	0.1251
ADH6	-1.261	-0.3348	6.284	-3.032	0.1254
DNAH12	-1.479	-0.5647	9.367	-3.033	0.1254
CBX5	-1.218	-0.2849	8.335	-3.033	0.1254
DNAJB12	1.217	0.2834	8.545	3.033	0.1254
ENOPH1	-1.151	-0.2031	8.471	-3.032	0.1254
MIB1	-1.333	-0.4147	6.77	-3.03	0.1258
MATR3	-1.105	-0.1435	10.6	-3.03	0.1258
PMAIP1	1.323	0.4036	6.916	3.028	0.1263
RABGAP1	-1.206	-0.2701	6.785	-3.026	0.1265
UPK1B	-1.209	-0.2734	11.38	-3.02	0.1281
AGL	-1.29	-0.3677	7.099	-3.02	0.1282
ANXA5	-1.134	-0.1812	10.18	-3.017	0.1289
MAD2L1BP	1.224	0.2917	7.983	3.015	0.1291
FBXL20	-1.211	-0.2764	7.987	-3.015	0.1292
CDC16	-1.169	-0.2257	8.142	-3.014	0.1292
CLDN10	1.55	0.632	7.594	3.013	0.1295
LINC01270	1.351	0.4342	4.984	3.01	0.1301
OR56B1	1.63	0.7046	5.131	3.009	0.1303
APH1A	1.166	0.2221	9.394	3.009	0.1303
RHPN1	-1.338	-0.4202	6.236	-3.008	0.1304
TIGD3	-1.317	-0.3975	4.034	-3.008	0.1304
HSPG2	-1.242	-0.3123	8.13	-3.006	0.1307
STOM	1.175	0.2321	10.13	3	0.1322
NYNRIN	-1.384	-0.4688	6.568	-3	0.1322
FAM13C	-1.29	-0.3669	6.432	-2.999	0.1323
SLC25A30	1.44	0.5262	5.807	2.998	0.1327
DPY19L3	-1.244	-0.3151	5.924	-2.995	0.1333
C1orf198	1.257	0.3297	5.568	2.995	0.1333
ACAD8	1.418	0.5034	6.909	2.991	0.1342
ITGB4	-1.239	-0.3095	8.872	-2.99	0.1345
LOC107985923	-1.372	-0.4561	3.259	-2.987	0.1351
NUDT16	1.235	0.3044	6.393	2.987	0.1351
GLRX3	-1.239	-0.3095	7.266	-2.985	0.1353
HK2	1.404	0.4891	6.649	2.985	0.1353
SYDE2	-1.375	-0.4595	5.251	-2.983	0.1357
SLC28A3	1.204	0.268	7.331	2.982	0.1359
CSRNP1	1.59	0.6688	6.542	2.982	0.1359
SDR16C5	1.43	0.5161	7.183	2.98	0.1362
ARHGAP17	1.305	0.3841	7.862	2.98	0.1362
MAGED2	-1.182	-0.2417	9.517	-2.977	0.1364
MAP1A	-1.283	-0.3594	7.882	-2.979	0.1364
ASH1L	-1.269	-0.3438	7.386	-2.978	0.1364
TMUB1	1.211	0.2763	8.288	2.979	0.1364
CASK	-1.181	-0.2397	8.277	-2.978	0.1364
EPHB3	-1.397	-0.4828	5.233	-2.976	0.1367
PITPNB	1.178	0.2362	9.009	2.975	0.1368
MAPKAPK2	-1.123	-0.1667	8.635	-2.974	0.1371
CSTB	1.124	0.1688	11.53	2.971	0.1375
KLK10	1.409	0.4942	9.992	2.971	0.1375
BFSP1	-1.652	-0.7243	3.829	-2.971	0.1375
TLR4	1.329	0.41	7.545	2.972	0.1375
BTG3	1.293	0.3704	7.203	2.969	0.1378
SLC47A2	-1.648	-0.7204	7.059	-2.968	0.1378
CDKL5	1.355	0.4381	6.301	2.969	0.1378
HTR3B	1.343	0.4257	3.18	2.969	0.1378
NPM2	-1.262	-0.336	5.589	-2.965	0.1385
SERTAD3	1.298	0.376	7.113	2.965	0.1385
ABHD12B	-1.177	-0.2354	7.822	-2.962	0.1386
FAR2	1.363	0.4465	5.837	2.963	0.1386
ACTA2	1.178	0.2369	7.669	2.962	0.1386
SIL1	1.144	0.1938	8.438	2.964	0.1386
TSPAN7	-1.487	-0.5725	7.509	-2.964	0.1386
IL18R1	1.534	0.6174	3.695	2.962	0.1386
ISX	1.319	0.3993	4.048	2.962	0.1386
SELENOW	-1.158	-0.2116	9.227	-2.961	0.1387
PRRC2B	-1.227	-0.2953	8.597	-2.96	0.1387
COL4A5	-1.429	-0.5147	6.977	-2.959	0.139
NBEAL2	-1.227	-0.2953	8.744	-2.953	0.1407
FICD	1.249	0.3211	7.035	2.952	0.1409
CCDC47	-1.135	-0.183	10.02	-2.952	0.1409
MT1A	1.144	0.1947	10.51	2.949	0.1414
ARAP3	-1.376	-0.4607	6.073	-2.949	0.1414
GLTP	-1.169	-0.2251	8.209	-2.948	0.1415
SMPD3	1.222	0.2895	6.69	2.948	0.1415
PTPN14	-1.381	-0.466	6.333	-2.946	0.1419
LRMP	-1.418	-0.5039	6.066	-2.944	0.1424
FAM183A	-1.187	-0.2475	9.922	-2.944	0.1424
SCPEP1	-1.154	-0.207	9.843	-2.944	0.1424
DLG2	1.437	0.523	4.404	2.943	0.1426
RASL11A	1.344	0.4262	5.486	2.942	0.1427
POU2F3	1.591	0.6697	6.591	2.939	0.143
PDCD4	-1.167	-0.2223	8.757	-2.938	0.143
KMT2A	-1.158	-0.2115	7.96	-2.938	0.143
MCTP2	1.191	0.2527	6.767	2.938	0.143
RAB3B	-1.373	-0.4575	7.67	-2.937	0.143
SOAT1	1.158	0.2112	9.567	2.938	0.143
TAF1	-1.245	-0.3159	7.606	-2.939	0.143
KYNU	1.591	0.6699	6.814	2.938	0.143
DNAH11	-1.376	-0.4603	9.698	-2.936	0.1433
FAM229A	-1.337	-0.4186	4.354	-2.933	0.1439
TROAP	-1.342	-0.424	4.065	-2.932	0.1439
SDS	1.413	0.4987	5.037	2.932	0.1439
TMEM92	1.582	0.6615	6.056	2.932	0.1439
ZNF492	1.497	0.5821	2.543	2.933	0.1439
S1PR2	1.285	0.3619	6.225	2.934	0.1439
GATS	-1.174	-0.2313	9.91	-2.93	0.1442
ING1	1.183	0.2422	7.311	2.93	0.1442
MEGF9	-1.201	-0.264	7.208	-2.929	0.1444
KLC1	-1.182	-0.2414	8.586	-2.928	0.1446
SERPINB3	-1.189	-0.2499	11.14	-2.927	0.1448
HIST1H1E	1.156	0.209	10.04	2.924	0.1455
ARL3	-1.186	-0.2467	9.746	-2.924	0.1455
NEGR1	-1.407	-0.4929	5.576	-2.923	0.1456
CAPNS2	-1.312	-0.392	3.53	-2.922	0.1459
SPATA2	1.165	0.22	8.006	2.921	0.1462
CCDC125	1.147	0.1975	9.298	2.918	0.1469
MCOLN2	1.24	0.3099	2.276	2.917	0.1469
PRDM15	-1.299	-0.3773	6.531	-2.917	0.1469
FUT6	1.264	0.3376	8.667	2.916	0.147
TEX2	-1.247	-0.3185	6.941	-2.916	0.147
ZNF215	-1.544	-0.6263	4.847	-2.916	0.147
ATXN10	-1.129	-0.1747	9.626	-2.911	0.1483
LIMK2	-1.204	-0.2677	9.229	-2.909	0.1488
ZNF716	1.353	0.4363	2.538	2.906	0.1495
ARFGAP2	1.149	0.2009	8.6	2.906	0.1495
PAPLN	-1.402	-0.4877	4.399	-2.906	0.1495
FNDC11	-1.288	-0.3656	6.114	-2.904	0.15
PROSER2	1.259	0.3322	6.759	2.901	0.1508
C12orf71	-1.415	-0.5008	3.775	-2.898	0.1516
PLA2G12A	-1.226	-0.2937	6.178	-2.898	0.1516
ODF3	1.417	0.5029	3.692	2.896	0.1517
CCDC78	-1.251	-0.3227	8.975	-2.895	0.1517
CRYBB3	-1.497	-0.5818	4.957	-2.897	0.1517
SLC2A12	1.143	0.193	8.321	2.897	0.1517
PLA1A	1.297	0.3754	4.451	2.896	0.1517
CLK4	-1.233	-0.3027	7.817	-2.895	0.1517
BNIPL	-1.294	-0.3723	7.777	-2.894	0.152
PEX14	1.167	0.2226	7.568	2.891	0.1529
GPC1	-1.309	-0.388	6.615	-2.888	0.153
CEACAM6	1.286	0.3624	10.37	2.888	0.153
PECR	-1.2	-0.2632	8.075	-2.887	0.153
PSAP	-1.104	-0.1422	10.99	-2.889	0.153
BCCIP	1.161	0.2151	8.183	2.887	0.153
DYNLT1	1.125	0.1699	10.42	2.888	0.153
XBP1	1.127	0.1722	10.14	2.887	0.153
TMEM106C	-1.222	-0.2894	7.822	-2.889	0.153
HS6ST2	-1.356	-0.4399	5.68	-2.887	0.153
H2AFV	-1.2	-0.2635	8.966	-2.889	0.153
MRPL49	1.218	0.2845	8.631	2.884	0.1536
LY6E-DT	1.319	0.3994	4.59	2.883	0.1538
RPS19BP1	-1.206	-0.2699	6.716	-2.883	0.1538
PNLIP	1.32	0.401	3.087	2.882	0.1539
HOXB13	-1.331	-0.413	3.833	-2.877	0.1554
FGF14-IT1	-1.578	-0.6583	4.031	-2.876	0.1554
VN1R4	1.315	0.3953	2.661	2.877	0.1554
BMP2	1.432	0.5181	5.859	2.876	0.1554
FDFT1	1.104	0.1434	10.76	2.874	0.156
POP1	-1.264	-0.3385	5.007	-2.871	0.1563
BTBD17	1.49	0.5754	4.438	2.871	0.1563
LAMA5	-1.21	-0.2754	8.055	-2.872	0.1563
TMEM138	1.135	0.1832	10.69	2.871	0.1563
DOCK4	1.242	0.3125	6.854	2.872	0.1563
GPD1L	-1.191	-0.2527	7.965	-2.87	0.1566
KLHL15	1.275	0.351	7.02	2.869	0.157
KIF2C	-1.329	-0.4103	3.13	-2.868	0.1571
DUSP6	1.315	0.3954	8.447	2.867	0.1573
TSPAN2	1.308	0.3873	6.947	2.866	0.1576
GPR83	-1.564	-0.6449	3.214	-2.862	0.1577
CFAP70	-1.257	-0.3303	8.519	-2.864	0.1577
DNAH10	-1.427	-0.5132	7.708	-2.862	0.1577
MPRIP	-1.151	-0.2033	9.079	-2.864	0.1577
AUTS2	-1.203	-0.2668	8.647	-2.863	0.1577
OPLAH	-1.263	-0.3367	5.609	-2.862	0.1577
IGF2R	-1.239	-0.3093	7.975	-2.864	0.1577
NOVA1	-1.387	-0.4718	4.137	-2.864	0.1577
RSRP1	-1.242	-0.3125	8.143	-2.863	0.1577
KRTAP1-5	-1.263	-0.3371	2.806	-2.861	0.1578
FST	1.495	0.5797	6.893	2.86	0.1581
RPS17	-1.123	-0.167	11.33	-2.86	0.1581
FAM198A	1.324	0.4046	2.771	2.859	0.1581
ZNF668	1.388	0.4729	4.715	2.858	0.1584
PDIA6	1.123	0.1674	9.574	2.856	0.1587
DCLRE1A	1.215	0.2809	6.943	2.856	0.1587
SULF1	1.344	0.4263	5.77	2.856	0.1588
IFNB1	1.296	0.3746	2.752	2.853	0.1592
SAFB2	-1.153	-0.2054	7.671	-2.854	0.1592
ADGRE5	1.166	0.2212	9.991	2.854	0.1592
TFIP11	1.182	0.241	7.573	2.85	0.16
LRP1	-1.379	-0.4634	7.325	-2.85	0.16
SULT2B1	-1.285	-0.3621	8.971	-2.849	0.1604
NDUFA9	1.173	0.2303	8.93	2.846	0.1611
TIAM1	-1.322	-0.4025	4.874	-2.846	0.1611
FAT1	-1.264	-0.3375	9.439	-2.844	0.1618
COX6C	-1.129	-0.1752	9.456	-2.842	0.1619
IFNGR1	1.214	0.2803	8.315	2.842	0.1619
ANTXR1	-1.227	-0.2952	9.355	-2.843	0.1619
LOC107985597	-1.462	-0.5478	3.547	-2.841	0.1621
STYK1	1.23	0.2981	6.527	2.841	0.1621
GTF3C2	-1.123	-0.1678	8.355	-2.84	0.1622
MINK1	-1.173	-0.2306	7.74	-2.84	0.1622
VNN1	1.368	0.4516	6.865	2.837	0.163
UTRN	-1.28	-0.3558	8.776	-2.835	0.1638
CTSO	1.193	0.255	7.627	2.831	0.1646
SHC2	-1.293	-0.3704	5.543	-2.832	0.1646
OR2T1	1.349	0.4317	2.8	2.83	0.1646
FOXN2	1.307	0.3866	7.01	2.83	0.1646
RAB19	1.204	0.2677	7.747	2.83	0.1646
NDNF	1.273	0.3487	3.869	2.831	0.1646
ZNF587	-1.204	-0.2676	7.849	-2.83	0.1646
CDC42BPB	-1.237	-0.3074	9.083	-2.829	0.1646
TTC12	-1.18	-0.2384	9.436	-2.828	0.1647
TNFSF13	1.539	0.6223	6.143	2.828	0.1647
TSPOAP1	-1.39	-0.4753	5.591	-2.828	0.1647
TPD52L1	-1.325	-0.4061	8.706	-2.825	0.1655
POSTN	-2.003	-1.002	4.882	-2.823	0.1662
SMIM17	-1.27	-0.3451	4.247	-2.821	0.1665
SCAI	-1.333	-0.415	5.868	-2.822	0.1665
NGB	-1.371	-0.4553	4.301	-2.821	0.1665
ABCD3	-1.153	-0.2057	9.498	-2.819	0.167
GDPGP1	1.277	0.3528	7.711	2.817	0.1678
PHACTR1	1.532	0.6152	4.617	2.815	0.1683
CDH26	-1.23	-0.2986	8.015	-2.815	0.1683
ADM	1.751	0.808	7.726	2.814	0.1685
COX7A2	-1.174	-0.2308	8.777	-2.812	0.1688
ASXL1	-1.161	-0.215	8.139	-2.812	0.1688
MLANA	-1.545	-0.6279	3.812	-2.812	0.1688
KCNMA1	-1.572	-0.653	4.498	-2.811	0.1688
ASNA1	-1.124	-0.1686	9.228	-2.811	0.1688
PGRMC1	-1.133	-0.1796	9.816	-2.806	0.1705
PLD5	-1.435	-0.521	3.041	-2.804	0.1705
ARSB	1.174	0.2315	7.081	2.806	0.1705
DRAM1	1.459	0.5449	5.759	2.805	0.1705
RPS18	-1.158	-0.2119	11.06	-2.804	0.1705
MSMO1	1.147	0.198	11.07	2.805	0.1705
CNTNAP2	-1.262	-0.3362	6.283	-2.802	0.1707
HTRA2	-1.15	-0.2018	7.974	-2.802	0.1707
ADGB	-1.227	-0.2951	8.94	-2.803	0.1707
GPR52	-1.5	-0.5853	3.839	-2.801	0.1709
MAP4K4	-1.141	-0.1897	7.873	-2.801	0.171
HAPLN3	1.425	0.5106	6.018	2.799	0.1712
NR4A2	1.25	0.3225	8.123	2.799	0.1712
ASB1	-1.274	-0.3493	6.673	-2.799	0.1712
TIAL1	-1.167	-0.2234	7.957	-2.799	0.1712
RBM19	-1.16	-0.2146	7.555	-2.8	0.1712
OR1M1	1.599	0.6769	6.059	2.798	0.1714
CFAP54	-1.429	-0.515	8.855	-2.797	0.1714
ECE1	1.144	0.1943	10.21	2.796	0.1716
ZHX3	-1.337	-0.4194	6.415	-2.795	0.1717
VWA8	-1.301	-0.38	8.191	-2.795	0.1717
TBC1D2B	-1.224	-0.2911	7.579	-2.795	0.1717
PKD1L1	-1.284	-0.3609	2.985	-2.792	0.1723
USP17L1	-1.427	-0.513	2.201	-2.793	0.1723
RRP1B	-1.189	-0.2496	7.465	-2.791	0.1724
PROSER1	1.179	0.2371	7.473	2.792	0.1724
VPS13A	-1.344	-0.427	6.164	-2.79	0.1726
ZNF416	1.535	0.6178	5.074	2.791	0.1726
IGSF6	-1.323	-0.4043	4.361	-2.789	0.1727
LIF	1.679	0.7473	7.291	2.788	0.1727
SF3B6	-1.176	-0.2341	9.395	-2.788	0.1727
MUC5B	1.305	0.3843	6.72	2.787	0.1727
D2HGDH	-1.292	-0.3692	5.33	-2.789	0.1727
ILKAP	-1.297	-0.375	5.637	-2.788	0.1727
EBPL	-1.239	-0.3097	8.422	-2.788	0.1727
QKI	1.166	0.222	8.78	2.787	0.1727
SH3PXD2A	-1.244	-0.3147	6.959	-2.788	0.1727
SETD3	-1.119	-0.1629	8.66	-2.786	0.173
PRRT2	-1.359	-0.4428	5.339	-2.782	0.1734
FPGS	1.158	0.2112	7.952	2.783	0.1734
AGMO	1.298	0.3763	2.494	2.783	0.1734
AP1AR	1.258	0.3314	5.886	2.781	0.1734
BTBD7	-1.191	-0.2521	7.657	-2.781	0.1734
NSD1	-1.211	-0.2766	7.09	-2.782	0.1734
ST6GAL1	1.128	0.1743	10.42	2.782	0.1734
TNS1	-1.258	-0.3312	7.13	-2.782	0.1734
ANKRD27	-1.181	-0.2394	7.37	-2.781	0.1734
APOBEC3B	1.962	0.972	6.154	2.783	0.1734
CLASP1	-1.194	-0.2553	7.904	-2.779	0.1738
FDX1	-1.326	-0.4071	6.98	-2.779	0.1739
DCDC1	-1.325	-0.4063	8.359	-2.778	0.174
WNT11	-1.482	-0.5674	3.482	-2.778	0.174
FNIP1	-1.203	-0.2671	7.4	-2.778	0.174
GALNT13	1.268	0.3429	2.83	2.777	0.1741
ATP6V1B1	-1.448	-0.5345	6.291	-2.776	0.1741
XRCC1	-1.101	-0.1394	9.352	-2.776	0.1741
CENPBD1	1.27	0.345	6.303	2.776	0.1741
AKAP14	-1.236	-0.3057	10.26	-2.775	0.1743
DNAH3	-1.34	-0.4217	10.19	-2.775	0.1743
RNASEL	1.229	0.2973	6.84	2.774	0.1744
TTLL7	-1.327	-0.4086	8.551	-2.774	0.1744
EOGT	-1.165	-0.2201	8.18	-2.772	0.1746
RNF144A	1.384	0.4689	4.146	2.773	0.1746
FRMD8	1.307	0.3859	5.832	2.772	0.1747
LOC105372427	-1.246	-0.3172	8.587	-2.771	0.175
MAN2A1	-1.243	-0.3139	5.988	-2.77	0.1751
ATP6V0A1	-1.114	-0.1558	9.447	-2.77	0.1751
SERPINE1	1.369	0.4528	8.631	2.769	0.1754
DSCAML1	-1.283	-0.3599	7.352	-2.767	0.176
HERC3	-1.233	-0.3022	6.95	-2.766	0.1762
MISP	1.153	0.2051	8.439	2.765	0.1763
C1orf220	1.241	0.3114	4.564	2.765	0.1763
ASS1	1.212	0.2774	9.758	2.765	0.1763
CDC25B	1.414	0.4995	7.096	2.763	0.1766
TKFC	1.124	0.1689	8.95	2.762	0.1771
RFLNB	-1.475	-0.5611	5.2	-2.761	0.1771
TRIB1	1.381	0.4662	9.14	2.761	0.1772
SDC2	-1.352	-0.4356	6.006	-2.759	0.1778
TMEM53	1.2	0.2632	8.065	2.757	0.1783
H2AFY	-1.111	-0.1516	10.08	-2.757	0.1783
KRTAP6-1	-1.318	-0.3979	5.27	-2.756	0.1784
ENPP5	-1.178	-0.2366	10.2	-2.756	0.1784
RAVER1	1.178	0.2362	7.815	2.754	0.1787
LCE1D	-1.359	-0.4422	5.312	-2.755	0.1787
GAB2	-1.474	-0.5599	5.551	-2.754	0.1787
CREBBP	-1.157	-0.2104	9.17	-2.749	0.1789
SNRNP200	-1.213	-0.2791	8.585	-2.752	0.1789
METAP1	-1.215	-0.2808	7.015	-2.75	0.1789
B3GAT1	1.267	0.3417	4.07	2.751	0.1789
OR51I1	1.576	0.6567	3.231	2.749	0.1789
ACOX1	-1.15	-0.2018	7.99	-2.751	0.1789
CCDC146	-1.165	-0.2207	11.05	-2.749	0.1789
FANCM	-1.257	-0.3301	4.185	-2.753	0.1789
S100A10	-1.136	-0.1837	11.22	-2.748	0.1789
SLC30A3	-1.336	-0.4183	4.62	-2.749	0.1789
CRELD1	1.243	0.3142	6.396	2.749	0.1789
WDR87	-1.28	-0.3566	2.778	-2.752	0.1789
LRRIQ1	-1.196	-0.2579	10.13	-2.749	0.1789
POMK	-1.16	-0.2137	7.429	-2.75	0.1789
LGALS17A	1.405	0.4903	4.95	2.748	0.1791
ALS2	1.197	0.2593	7.419	2.747	0.1791
SNCA	-1.287	-0.3644	6.883	-2.747	0.1791
PHIP	-1.163	-0.2175	8.306	-2.745	0.1796
TNFRSF10A	1.317	0.3975	7.119	2.745	0.1796
EGFL6	-1.369	-0.4534	5.628	-2.744	0.18
GNAS	-1.13	-0.1764	10.12	-2.743	0.1801
LGALS1	-1.225	-0.293	8.844	-2.743	0.1801
FYN	-1.273	-0.348	5.962	-2.74	0.1807
TMEM179	1.398	0.4834	4.005	2.741	0.1807
DDAH2	-1.212	-0.2778	6.908	-2.74	0.1809
ANLN	-1.313	-0.3926	8.162	-2.739	0.181
CCDC191	-1.179	-0.2376	8.154	-2.739	0.181
NDUFA11	-1.114	-0.1553	9.582	-2.738	0.1811
SNX6	1.177	0.2351	9.169	2.738	0.1811
MTOR	-1.197	-0.2598	7.338	-2.735	0.1814
ZNF710	1.236	0.3055	7.733	2.737	0.1814
PPP2R2A	1.161	0.2156	9.202	2.736	0.1814
ENTPD7	-1.172	-0.2286	7.477	-2.735	0.1814
SRD5A3	1.264	0.338	10.76	2.736	0.1814
GABBR1	-1.212	-0.2778	5.623	-2.733	0.1816
GCA	1.324	0.4045	6.708	2.732	0.1816
GPX2	-1.272	-0.3474	9.493	-2.733	0.1816
VPS13C	-1.331	-0.4123	8.062	-2.732	0.1816
C11orf80	-1.474	-0.56	4.597	-2.734	0.1816
KYAT1	-1.275	-0.3501	6.673	-2.733	0.1816
TMEM63A	1.167	0.2232	8.919	2.734	0.1816
YIF1A	1.142	0.1915	8.496	2.73	0.182
CRYBA1	-1.259	-0.3322	2.624	-2.73	0.182
OR13J1	-1.414	-0.4995	4.223	-2.731	0.182
LYZ	1.311	0.3911	7.587	2.73	0.182
PLPPR1	-1.206	-0.2707	2.553	-2.729	0.182
ZNF747	1.189	0.2497	6.838	2.731	0.182
CLIP2	-1.428	-0.514	4.932	-2.725	0.1834
CCNE2	1.283	0.3596	2.484	2.725	0.1834
ATG16L2	-1.302	-0.3809	5.194	-2.724	0.1837
JAK1	-1.12	-0.1638	9.349	-2.723	0.1838
SUSD1	-1.254	-0.3266	6.647	-2.723	0.1838
UBE4B	-1.205	-0.2688	8.252	-2.721	0.1844
SLC35A4	1.157	0.2107	9.794	2.72	0.1844
LRIT3	-1.355	-0.4381	3.137	-2.72	0.1844
STEAP3	-1.21	-0.2746	10.63	-2.72	0.1844
HHIP	1.264	0.338	3.139	2.721	0.1844
GLCCI1	-1.238	-0.3083	7.76	-2.716	0.1845
CCNYL1	1.193	0.2541	7.334	2.719	0.1845
NEK5	-1.21	-0.2751	9.374	-2.718	0.1845
OR52A5	1.264	0.3378	2.314	2.717	0.1845
ASPH	1.11	0.1502	10.39	2.716	0.1845
PRDX1	-1.123	-0.1668	10.77	-2.716	0.1845
ODAM	-1.46	-0.5459	4.825	-2.718	0.1845
SLC1A4	1.186	0.2462	6.621	2.718	0.1845
SRI	-1.186	-0.246	10.08	-2.717	0.1845
MAP3K7	-1.172	-0.229	8.16	-2.718	0.1845
MBD2	-1.094	-0.1293	9.832	-2.718	0.1845
CDC42SE2	1.165	0.2202	8.784	2.714	0.1851
C12orf29	1.332	0.4137	6.482	2.714	0.1851
EPHX4	-1.35	-0.4331	4.515	-2.713	0.1852
PARM1	1.22	0.2873	9.014	2.713	0.1852
PCDHB13	-1.269	-0.344	5.357	-2.713	0.1852
SLC39A9	1.112	0.1535	9.036	2.71	0.186
SPNS2	1.402	0.4877	6.56	2.71	0.1861
CEBPB	1.182	0.241	7.586	2.706	0.1863
RAB40B	-1.252	-0.3242	6.671	-2.706	0.1863
SCN11A	1.37	0.4537	3.921	2.705	0.1863
GLIPR2	1.162	0.2171	9.469	2.703	0.1863
DNMBP	1.149	0.1999	8.699	2.707	0.1863
KAT2A	-1.212	-0.2778	6.493	-2.708	0.1863
ERO1A	1.237	0.3066	9.395	2.703	0.1863
APP	-1.109	-0.1493	10.24	-2.708	0.1863
AFDN	-1.139	-0.1881	9.601	-2.704	0.1863
UBA6	1.315	0.3949	7.18	2.704	0.1863
SCD	1.169	0.2253	9.998	2.707	0.1863
SPRR2A	1.606	0.6834	10.22	2.707	0.1863
TLE3	-1.164	-0.2192	7.278	-2.703	0.1863
ACTG1	-1.082	-0.1131	12.27	-2.706	0.1863
NEK11	-1.247	-0.319	8.348	-2.706	0.1863
CALM1	-1.183	-0.242	10.31	-2.705	0.1863
CUL3	-1.159	-0.213	8.606	-2.705	0.1863
FGD3	1.338	0.4198	6.902	2.708	0.1863
MEGF8	-1.286	-0.3633	6.105	-2.702	0.1864
SMLR1	-1.26	-0.3329	3.327	-2.702	0.1865
CFAP47	-1.325	-0.4059	9.281	-2.702	0.1865
TPPP3	-1.116	-0.1586	11.8	-2.7	0.1868
MGAT4A	1.41	0.4953	5.673	2.7	0.1869
TTLL1	-1.206	-0.2702	7.23	-2.699	0.187
DTX2	1.17	0.226	8.556	2.698	0.1874
CTSZ	-1.218	-0.2841	8.972	-2.697	0.1878
RND3	1.255	0.3278	9.389	2.696	0.1879
ARHGEF12	-1.211	-0.2767	9.127	-2.694	0.1882
APBB1	-1.292	-0.3696	6.172	-2.695	0.1882
DNAJA1	1.139	0.1878	10.42	2.694	0.1882
SCGB3A2	1.332	0.4139	3.271	2.693	0.1886
PTP4A1	1.13	0.1769	10.73	2.693	0.1887
PSMB2	1.106	0.1453	9.768	2.691	0.1892
SLC25A5	-1.13	-0.1769	10.18	-2.69	0.1893
NIP7	1.158	0.2116	8.912	2.69	0.1893
BID	1.206	0.2708	8.778	2.69	0.1893
MIER3	1.273	0.3478	6.758	2.689	0.1894
USP34	-1.156	-0.2097	8.116	-2.689	0.1894
KIF1B	-1.193	-0.2543	6.878	-2.687	0.1902
STAU2	-1.137	-0.1847	8.69	-2.685	0.1906
TMEM222	1.179	0.2379	8.47	2.685	0.1906
RASAL2	-1.169	-0.2254	8.113	-2.685	0.1906
LOC101927640	1.442	0.5276	2.625	2.682	0.1914
GPX3	-1.206	-0.2703	8.832	-2.682	0.1914
UBQLN3	1.467	0.5528	4.713	2.681	0.1916
TCEANC	1.355	0.4384	5.153	2.679	0.1926
VPS39	1.153	0.2048	8.327	2.678	0.1928
GSTA4	-1.3	-0.379	6.026	-2.677	0.1928
CCDC40	-1.205	-0.2691	7.833	-2.677	0.1928
RAB15	-1.399	-0.4846	6.88	-2.676	0.1929
CHMP1B	-1.108	-0.1481	9.812	-2.676	0.1929
PSMF1	1.13	0.1762	10.6	2.676	0.1929
OLFM4	2.121	1.085	4.536	2.672	0.1934
RIBC1	-1.163	-0.2179	8.793	-2.671	0.1934
ABCA2	-1.325	-0.4057	6.274	-2.672	0.1934
ERBB2	-1.142	-0.1919	7.971	-2.674	0.1934
FLNB	-1.265	-0.3386	6.766	-2.672	0.1934
HSPB11	-1.144	-0.1937	9.907	-2.671	0.1934
CACNG8	-1.433	-0.519	4.128	-2.674	0.1934
KIF13A	-1.196	-0.2577	7.264	-2.673	0.1934
MARCKSL1	1.298	0.3767	7.298	2.673	0.1934
EAF1	1.153	0.2054	7.743	2.671	0.1934
LGR5	-1.426	-0.512	3.819	-2.673	0.1934
DAPL1	-1.526	-0.6096	4.216	-2.672	0.1934
ARL9	1.271	0.346	4.618	2.67	0.1935
EVPL	-1.322	-0.4032	5.894	-2.669	0.1935
AADACL4	1.34	0.4219	2.787	2.67	0.1935
CDC42BPA	-1.227	-0.2955	7.564	-2.67	0.1935
NBN	1.215	0.2814	7.157	2.668	0.1939
GLI3	-1.289	-0.3668	5.814	-2.666	0.1945
NR1D1	1.31	0.39	7.28	2.665	0.1949
DNMT1	-1.23	-0.2983	7.028	-2.664	0.1953
FBXL13	-1.326	-0.407	7.919	-2.663	0.1953
PNN	-1.158	-0.2121	8.797	-2.663	0.1953
SLC38A4	1.503	0.588	4.924	2.663	0.1953
ATP5H	-1.194	-0.2556	9.031	-2.661	0.1957
TPR	-1.184	-0.2432	7.88	-2.661	0.1957
HK1	-1.174	-0.231	8.74	-2.661	0.1958
DCLRE1C	1.189	0.2497	7.662	2.659	0.196
TDO2	-1.353	-0.4367	3.985	-2.66	0.196
PTPRM	-1.267	-0.3416	7.15	-2.659	0.1961
LCE4A	-1.322	-0.4022	5.13	-2.658	0.1963
KCNK13	-1.371	-0.4556	4.25	-2.657	0.1964
STAU1	1.085	0.1172	10.83	2.657	0.1964
SYNE1	-1.372	-0.4567	8.532	-2.655	0.1969
MXD1	1.433	0.5195	8.977	2.655	0.1969
TLN1	-1.221	-0.288	7.218	-2.656	0.1969
TMPRSS2	1.146	0.1965	8.785	2.654	0.1969
LOC728743	1.359	0.4426	5.759	2.654	0.1969
HIST1H2BK	1.234	0.3031	11.48	2.655	0.1969
SH2D1B	2.193	1.133	5.887	2.654	0.197
ARHGEF26	-1.283	-0.3598	6.113	-2.652	0.1975
LENG8	-1.157	-0.2105	10.15	-2.649	0.198
ACAP3	-1.199	-0.2621	6.731	-2.648	0.198
VPS37D	-1.226	-0.2944	6.067	-2.648	0.198
HEBP2	-1.137	-0.1847	8.508	-2.648	0.198
KRT6C	-1.271	-0.3456	10.77	-2.646	0.198
CLEC4G	1.28	0.3562	5.058	2.645	0.198
MCL1	1.142	0.1914	10.83	2.647	0.198
PLCG2	1.261	0.3347	4.802	2.646	0.198
FXYD3	1.124	0.1688	11.39	2.647	0.198
RBM41	-1.191	-0.2521	7.124	-2.646	0.198
C5orf22	1.202	0.2658	7.912	2.647	0.198
TMPRSS4	1.165	0.2207	9.419	2.647	0.198
BRD2	1.109	0.1493	9.392	2.65	0.198
RRAGC	1.239	0.3093	8.028	2.647	0.198
TPM2	-1.329	-0.4104	6.132	-2.645	0.198
ZKSCAN1	-1.174	-0.231	9.836	-2.648	0.198
RILP	1.234	0.3036	6.665	2.645	0.198
ADGRG1	-1.13	-0.1768	10.08	-2.65	0.198
SRGAP3	-1.157	-0.2105	8.043	-2.646	0.198
MAST2	-1.233	-0.3027	6.584	-2.644	0.1983
B3GNT2	1.17	0.2267	8.973	2.64	0.1998
ITPR2	-1.276	-0.3518	3.651	-2.64	0.1998
ADAM22	1.339	0.4215	3.187	2.64	0.1998
SCARB2	1.27	0.3444	7.64	2.639	0.1998
PRDX6	-1.167	-0.2231	9.258	-2.639	0.1998
2003-09-01	-1.315	-0.3947	5.09	-2.637	0.2003
PAFAH1B1	-1.124	-0.1685	9.618	-2.636	0.2009
MRPS17	1.214	0.2792	7.226	2.635	0.201
DEAF1	-1.221	-0.2882	6.615	-2.633	0.2014
GRAMD2A	-1.306	-0.3846	8.454	-2.634	0.2014
C19orf53	-1.113	-0.1543	10.29	-2.633	0.2014
MAK	1.166	0.2217	8.063	2.632	0.2014
NKTR	-1.169	-0.2247	8.881	-2.634	0.2014
NLN	-1.299	-0.3777	5.386	-2.632	0.2014
TGFBI	-1.419	-0.5051	8.708	-2.634	0.2014
THRA	-1.162	-0.2163	8.277	-2.632	0.2014
SRP14	-1.117	-0.1594	10.38	-2.631	0.2015
TET3	-1.212	-0.277	6.609	-2.63	0.2021
WHAMM	1.299	0.3769	6.238	2.627	0.2031
CLDN8	-1.418	-0.5043	5.192	-2.627	0.2031
OR10H1	-1.226	-0.294	2.41	-2.626	0.2032
KANK4	-1.376	-0.4605	3.938	-2.625	0.2037
GPLD1	-1.278	-0.354	3.118	-2.624	0.2039
SLC35B3	1.141	0.1904	8.258	2.622	0.2044
WDR44	-1.14	-0.1894	7.557	-2.622	0.2044
BCL7B	1.134	0.1811	7.735	2.622	0.2044
FBRS	1.122	0.1657	8.099	2.62	0.205
SLC26A9	1.356	0.4395	5.485	2.62	0.2051
ZNF586	-1.259	-0.3327	6.022	-2.619	0.2051
C3	1.116	0.158	12.15	2.619	0.2053
OR4S2	-1.224	-0.2913	2.586	-2.618	0.2055
LPCAT2	-1.214	-0.2802	8.604	-2.618	0.2055
SPATA25	-1.451	-0.5368	4.513	-2.616	0.2058
STRBP	-1.299	-0.3777	7.812	-2.616	0.2058
KATNAL2	-1.23	-0.2989	8.021	-2.616	0.2058
TXNRD3	-1.438	-0.5242	4.957	-2.61	0.2066
HINT3	1.238	0.3083	7.293	2.611	0.2066
CYP24A1	1.651	0.7234	8.029	2.611	0.2066
PTK2B	1.186	0.2463	8.301	2.611	0.2066
FLII	-1.13	-0.1768	8.855	-2.61	0.2066
FOLR3	1.207	0.2718	5.691	2.612	0.2066
OR1L3	1.358	0.4419	2.592	2.614	0.2066
SPRYD4	1.253	0.3253	7.224	2.613	0.2066
C2orf74	-1.225	-0.2926	6.362	-2.611	0.2066
CARD17	1.787	0.8379	5.239	2.611	0.2066
UACA	-1.214	-0.2802	7.114	-2.613	0.2066
CC2D2A	-1.179	-0.2379	9.534	-2.612	0.2066
PTPRF	-1.306	-0.3848	9.056	-2.61	0.2066
RINT1	1.191	0.2526	7.261	2.614	0.2066
RUVBL1	-1.119	-0.1617	9.539	-2.61	0.2066
PSMA3	1.155	0.2079	8.401	2.609	0.2069
RIPK4	-1.156	-0.2088	8.996	-2.606	0.2077
MSRB3	-1.243	-0.3138	6.15	-2.606	0.208
PCM1	-1.171	-0.2276	9.679	-2.605	0.208
SEMA5A	-1.248	-0.3198	5.626	-2.605	0.208
LPIN2	1.194	0.2553	7.086	2.605	0.208
JAG2	-1.211	-0.2757	6.934	-2.604	0.2082
MGRN1	-1.147	-0.1985	8.909	-2.602	0.2084
TRPM5	-1.276	-0.3513	3.326	-2.602	0.2084
THG1L	1.217	0.2834	7.24	2.602	0.2084
LRBA	-1.287	-0.3635	9.819	-2.602	0.2084
C15orf61	-1.394	-0.4793	2.721	-2.602	0.2086
NCDN	1.186	0.2456	6.974	2.601	0.2086
ZNF526	1.182	0.2417	7.375	2.6	0.2088
EPHA4	-1.219	-0.2856	7.277	-2.598	0.2088
RHCG	1.44	0.5261	6.832	2.598	0.2088
UFC1	-1.11	-0.1502	11.28	-2.6	0.2088
MKL2	-1.162	-0.2169	8.55	-2.599	0.2088
ANKRA2	-1.167	-0.2233	7.479	-2.598	0.2088
SFPQ	-1.133	-0.1803	8.824	-2.599	0.2088
SLC8B1	1.217	0.2829	8.307	2.599	0.2088
MTA1	-1.149	-0.2	7.705	-2.598	0.2088
OR4N5	1.278	0.3538	2.526	2.597	0.2089
ABCC5	-1.172	-0.2296	6.907	-2.597	0.209
CYLD	1.181	0.2395	7.6	2.597	0.209
FGGY	-1.215	-0.2804	7.082	-2.596	0.209
PNISR	-1.147	-0.1977	8.886	-2.595	0.2096
ACAA2	-1.239	-0.309	6.836	-2.594	0.2098
RABEP2	-1.204	-0.2673	6.605	-2.593	0.2102
RNF149	1.234	0.3029	7.099	2.592	0.2103
NDUFB8	-1.122	-0.1667	8.89	-2.592	0.2103
GTPBP4	1.161	0.2152	6.986	2.591	0.2105
MCUB	1.333	0.4142	7.223	2.591	0.2105
BACH1	1.231	0.2998	7.489	2.591	0.2105
GNA15	1.161	0.2158	9.246	2.588	0.2117
MAP3K20	-1.271	-0.3462	6.261	-2.586	0.2122
MAPKAP1	-1.132	-0.1789	8.35	-2.586	0.2122
SSX9	1.278	0.3539	4.286	2.585	0.2126
RPL31	-1.204	-0.2678	9.623	-2.585	0.2126
ALCAM	-1.133	-0.18	11.1	-2.583	0.2131
PPIF	1.303	0.3818	8.479	2.581	0.2138
CCDC7	-1.407	-0.4929	5.89	-2.581	0.2138
NUDT18	-1.256	-0.3293	5.853	-2.58	0.214
MBD3L1	-1.347	-0.4298	4.018	-2.58	0.2141
ATG12	1.352	0.4346	7.28	2.58	0.2141
LRRC6	-1.123	-0.1678	9.634	-2.579	0.2143
DCTN2	-1.126	-0.1707	8.773	-2.578	0.2144
WWOX	-1.208	-0.272	7.766	-2.578	0.2144
HIST1H4E	-1.123	-0.167	10.88	-2.578	0.2144
SSBP2	-1.127	-0.1724	10.07	-2.576	0.2149
CENPP	-1.388	-0.4731	4.406	-2.575	0.2152
BAIAP2	-1.115	-0.1573	9.908	-2.573	0.2156
ADAP1	1.196	0.2577	7.64	2.574	0.2156
WFDC5	1.704	0.769	6.362	2.573	0.2156
DRD3	-1.328	-0.4094	3.386	-2.573	0.2156
TMEM25	-1.251	-0.3227	5.211	-2.573	0.2156
C10orf126	-1.216	-0.2826	3.133	-2.57	0.2164
XKR5	1.234	0.303	3.836	2.571	0.2164
KPNA7	-1.188	-0.2484	7.528	-2.571	0.2164
CAD	-1.27	-0.345	6.225	-2.569	0.2167
RHBDD1	1.185	0.2453	7.736	2.569	0.2167
SUMO4	-1.365	-0.4488	4.37	-2.566	0.2182
PPP1R15B	1.117	0.1595	8.551	2.564	0.219
IL1R1	1.217	0.2829	8.323	2.563	0.2191
PNOC	-1.294	-0.3721	4.624	-2.563	0.2191
CLEC12A	-1.221	-0.2876	2.541	-2.561	0.2198
SRPX2	1.239	0.3088	8.837	2.56	0.22
C15orf39	1.226	0.2942	7.236	2.56	0.22
GALNT18	-1.209	-0.2737	6.832	-2.559	0.2202
B3GNT3	1.183	0.2424	8.367	2.559	0.2204
SNX8	1.25	0.3215	6.535	2.558	0.2204
CELSR1	-1.262	-0.3359	7.21	-2.558	0.2206
NFIB	-1.164	-0.2187	9.958	-2.557	0.2207
SPIN1	-1.108	-0.1478	8.35	-2.557	0.2208
PRPF8	-1.219	-0.2862	9.328	-2.556	0.2211
L3HYPDH	-1.22	-0.2871	5.685	-2.555	0.2214
KMT2C	-1.169	-0.2258	8.448	-2.554	0.2217
TMEM51	1.288	0.3647	6.831	2.553	0.2219
C2	1.286	0.3634	6.964	2.551	0.2229
AKR1C2	-1.223	-0.2899	10.33	-2.55	0.2233
ACIN1	-1.127	-0.1725	7.862	-2.549	0.2234
PAWR	-1.153	-0.2048	7.315	-2.548	0.2234
ADAMTSL4	-1.42	-0.5056	5.763	-2.549	0.2234
OR1Q1	-1.412	-0.4976	2.493	-2.547	0.2235
KRT5	-1.211	-0.276	11.84	-2.548	0.2235
USF2	-1.149	-0.2003	7.661	-2.548	0.2235
DHRS3	1.151	0.2026	9.315	2.547	0.2236
LOC100131107	1.288	0.3654	3.433	2.546	0.2237
TTL	-1.233	-0.3016	6.431	-2.546	0.2237
LURAP1	-1.31	-0.3894	4.785	-2.546	0.2237
MICAL3	-1.275	-0.3499	7.211	-2.545	0.2239
CSK	1.193	0.2547	7.026	2.544	0.2241
TTC14	-1.255	-0.3276	7.112	-2.544	0.2241
DNM1	1.267	0.3413	5.65	2.544	0.2241
SREK1	-1.155	-0.2074	9.013	-2.543	0.2244
MATN4	-1.274	-0.349	4.833	-2.541	0.225
RNF2	-1.148	-0.1995	7.174	-2.54	0.2252
BMPR1A	1.134	0.1813	9.513	2.54	0.2252
OR52B2	1.388	0.4728	3.327	2.54	0.2254
LRRC37A4P	-1.247	-0.3181	7.36	-2.538	0.2257
SNX27	1.123	0.167	8.292	2.539	0.2257
IVNS1ABP	-1.15	-0.201	8.617	-2.538	0.2259
POLR1D	-1.131	-0.1777	8.394	-2.537	0.226
PTCH1	1.156	0.2088	7.676	2.537	0.226
ZNF705E	-1.334	-0.416	4.494	-2.532	0.2266
GNE	1.276	0.3514	8.774	2.534	0.2266
ZNF273	-1.23	-0.299	7.008	-2.533	0.2266
ZNF280B	1.292	0.3701	3.983	2.532	0.2266
CTSL	-1.141	-0.19	7.882	-2.535	0.2266
GAD1	-1.238	-0.3081	6.938	-2.533	0.2266
TANC2	-1.287	-0.3635	7.693	-2.532	0.2266
MGST3	-1.137	-0.1847	9.694	-2.534	0.2266
MPP6	-1.289	-0.3662	5.139	-2.535	0.2266
MAP1S	1.153	0.2057	8.12	2.532	0.2266
SLC35C1	1.291	0.369	7.213	2.532	0.2266
BLVRA	-1.162	-0.2161	8.081	-2.534	0.2266
XPC	-1.184	-0.2442	8.423	-2.533	0.2266
RIPOR1	-1.124	-0.1682	8.193	-2.534	0.2266
HDAC5	-1.225	-0.2931	7.604	-2.53	0.2268
MFGE8	-1.181	-0.2405	8.383	-2.531	0.2268
ARMC4	-1.238	-0.3076	8.47	-2.53	0.2268
PPP3CB	-1.173	-0.2297	7.357	-2.531	0.2268
TNNI2	-1.276	-0.3515	5.975	-2.53	0.2268
FUBP3	-1.17	-0.2264	7.992	-2.53	0.2268
FASTKD2	1.227	0.2948	6.196	2.528	0.227
NTF3	1.246	0.3168	3.271	2.528	0.227
HM13	1.201	0.2643	9.46	2.528	0.227
SNX25	-1.305	-0.3843	6.751	-2.528	0.227
BRMS1L	-1.233	-0.3023	6.097	-2.528	0.227
RPL11	-1.112	-0.1538	10.73	-2.527	0.2273
EDN2	2.056	1.04	4.919	2.526	0.2274
TMEM143	1.255	0.3273	5.535	2.526	0.2275
PODNL1	-1.233	-0.3027	6.164	-2.526	0.2275
IDH3A	1.108	0.1485	10.13	2.525	0.2276
NCR2	1.215	0.2811	3.195	2.524	0.2277
CLCA2	-1.453	-0.5386	6.971	-2.524	0.2277
LARP1B	-1.207	-0.2708	6.929	-2.524	0.2279
TFDP1	-1.196	-0.2577	8.035	-2.523	0.2279
ZBTB8B	-1.488	-0.5736	3	-2.522	0.2284
RSPH1	-1.187	-0.2472	9.657	-2.522	0.2284
OSBPL8	-1.12	-0.1629	7.932	-2.52	0.2287
TNFAIP8	1.222	0.2895	7.606	2.521	0.2287
ITFG2	-1.185	-0.2454	8.311	-2.52	0.2287
NHSL1	-1.205	-0.2685	8.576	-2.521	0.2287
MFSD14B	1.125	0.1705	9.91	2.52	0.2287
CAPS2	-1.286	-0.3629	7.466	-2.518	0.2295
CMIP	-1.108	-0.148	9.62	-2.517	0.2296
HNRNPCL4	1.242	0.3122	1.821	2.516	0.2297
NET1	-1.154	-0.2061	9.759	-2.514	0.2297
UQCR11	-1.114	-0.1563	9.066	-2.516	0.2297
DBI	-1.182	-0.2415	8.845	-2.516	0.2297
ARMC3	-1.135	-0.1832	9.311	-2.516	0.2297
MUC21	1.656	0.7278	7.013	2.515	0.2297
ATRAID	-1.118	-0.1608	9.656	-2.514	0.2297
FXYD5	1.515	0.5989	7.975	2.515	0.2297
LRRC49	-1.202	-0.2659	7.998	-2.516	0.2297
DNAJC12	1.284	0.3601	3.506	2.514	0.2297
PTPRJ	1.329	0.4105	6.982	2.514	0.2297
TAF4	-1.194	-0.256	7.02	-2.514	0.2297
DAW1	-1.111	-0.1522	10.07	-2.513	0.2298
CEP131	-1.207	-0.2715	6.527	-2.513	0.23
SMPDL3A	-1.192	-0.2529	7.241	-2.511	0.2307
SGF29	1.154	0.2065	8.093	2.51	0.231
ERICH3	-1.215	-0.2807	7.886	-2.508	0.2311
PHLPP1	-1.297	-0.3751	8.747	-2.509	0.2311
ZCCHC13	-1.22	-0.2868	2.416	-2.509	0.2311
MTMR10	-1.228	-0.2962	5.645	-2.509	0.2311
FERMT1	1.397	0.4828	8.664	2.509	0.2311
CDC14A	-1.166	-0.2214	9.535	-2.508	0.2312
CCIN	1.234	0.3033	3.096	2.508	0.2312
ZFYVE1	-1.171	-0.2282	6.996	-2.507	0.2315
FLI1	1.283	0.3598	3.862	2.506	0.2319
GIPC3	1.278	0.354	2.936	2.505	0.232
HSD17B2	1.238	0.3076	7.107	2.505	0.232
CCDC34	-1.139	-0.1883	7.91	-2.505	0.232
HNRNPUL1	-1.114	-0.1555	9.835	-2.503	0.2325
ARF5	-1.189	-0.2501	8.793	-2.503	0.2325
PBRM1	-1.161	-0.215	7.648	-2.502	0.2325
GIGYF1	-1.382	-0.4662	5.42	-2.503	0.2325
GABARAPL2	-1.14	-0.1896	8.279	-2.502	0.2327
LAMB2	-1.252	-0.3247	7.065	-2.501	0.2327
GDE1	-1.161	-0.2148	8.94	-2.501	0.2327
ERCC6L	-1.304	-0.3828	5.217	-2.501	0.2327
PCBD2	-1.226	-0.2942	6.297	-2.501	0.2327
GNG11	1.204	0.2675	2.608	2.5	0.2331
CDH11	-1.219	-0.2856	6.276	-2.499	0.2332
OR52N2	-1.251	-0.3226	3.134	-2.499	0.2332
MAP6	-1.26	-0.3339	9.297	-2.499	0.2332
STAP2	1.115	0.1571	8.289	2.498	0.2332
MIF4GD	-1.223	-0.2904	6.516	-2.498	0.2332
DEPTOR	-1.417	-0.5032	6.411	-2.497	0.2334
IQCN	-1.361	-0.4449	6.861	-2.498	0.2334
BCLAF1	-1.127	-0.1728	10.05	-2.497	0.2334
LARP4	1.295	0.3734	7.356	2.494	0.234
ZNF583	1.395	0.48	4.554	2.494	0.234
EPS8	1.245	0.3158	8.528	2.494	0.234
CFAP45	-1.127	-0.1731	9.887	-2.494	0.234
MT1M	1.327	0.4081	6.746	2.494	0.234
FAM161A	-1.272	-0.3469	5.989	-2.494	0.234
CCNB2	-1.418	-0.5039	4.56	-2.494	0.234
MAP3K13	1.247	0.3188	9.443	2.495	0.234
ITGAE	-1.299	-0.3776	5.608	-2.492	0.2344
BCAM	-1.246	-0.317	7.259	-2.492	0.2345
GJD2	-1.253	-0.3252	4.231	-2.491	0.2345
HIST1H3H	1.319	0.3998	5.508	2.491	0.2345
TXNIP	1.159	0.2133	10.37	2.489	0.2347
DPH2	1.129	0.1754	7.974	2.49	0.2347
NPTN	-1.106	-0.145	9.531	-2.49	0.2347
CATSPER3	-1.357	-0.4409	5.796	-2.489	0.2347
TIMP3	1.309	0.3881	7.983	2.49	0.2347
CASTOR2	-1.195	-0.2574	8.364	-2.489	0.2347
TAGLN2	-1.132	-0.1792	10.64	-2.489	0.2347
METTL25	-1.285	-0.3614	5.751	-2.49	0.2347
TIFA	1.471	0.5564	4.251	2.489	0.2347
NKIRAS2	1.182	0.2418	9.429	2.487	0.2353
TAF3	-1.251	-0.3228	5.782	-2.487	0.2353
FAM9B	-1.205	-0.2685	2.65	-2.486	0.2354
JAK2	1.178	0.2365	7.521	2.485	0.2355
POLR2A	-1.146	-0.1969	9.786	-2.486	0.2355
RFX3	-1.162	-0.2165	10.33	-2.485	0.2355
EIF1	-1.084	-0.1162	11.42	-2.484	0.2356
UBAC1	-1.165	-0.2204	7.24	-2.485	0.2356
GUCD1	1.137	0.1855	8.755	2.484	0.2356
CLDN7	1.134	0.1808	10.7	2.482	0.2361
CFI	1.277	0.3525	7.718	2.483	0.2361
IGFL3	-1.445	-0.5308	3.905	-2.482	0.2361
VAMP1	-1.281	-0.3578	6.645	-2.483	0.2361
INAFM2	-1.276	-0.3522	5.07	-2.48	0.2369
CEND1	-1.203	-0.2672	5.978	-2.48	0.2369
ZNF541	-1.207	-0.2713	5.51	-2.48	0.2369
OGFOD3	1.215	0.2807	6.938	2.479	0.237
2008-09-01	-1.163	-0.218	7.312	-2.478	0.2377
EIF3H	-1.098	-0.1343	9.903	-2.477	0.2377
LASP1	-1.121	-0.1651	9.166	-2.476	0.2382
C6orf48	-1.136	-0.1842	7.423	-2.475	0.2382
CEP290	-1.255	-0.3281	7.064	-2.476	0.2382
SLC28A2	1.343	0.4252	5.661	2.475	0.2382
PUM3	1.197	0.2596	7.149	2.476	0.2382
CKAP4	1.166	0.222	8.679	2.474	0.2385
CDH5	-1.293	-0.3702	3.624	-2.473	0.2387
NBEA	1.133	0.18	9.211	2.472	0.2387
PSEN1	1.134	0.1818	9.32	2.473	0.2387
BIRC6	-1.221	-0.2878	7.767	-2.473	0.2387
RALGDS	-1.138	-0.1863	8.978	-2.473	0.2387
ARHGEF2	-1.127	-0.172	7.423	-2.472	0.2387
ESYT1	-1.172	-0.2285	8.276	-2.472	0.2388
STOX2	-1.2	-0.2634	7.296	-2.472	0.2388
C2orf76	-1.349	-0.4315	7.257	-2.469	0.2393
ADIG	-1.3	-0.3786	4.252	-2.47	0.2393
ELF5	-1.143	-0.1934	8.84	-2.468	0.2393
GRN	1.194	0.2558	9.374	2.468	0.2393
ACACA	-1.186	-0.2457	7.854	-2.468	0.2393
SAMD12	1.135	0.1833	7.551	2.469	0.2393
C21orf58	-1.168	-0.2245	9.109	-2.47	0.2393
ETNK2	1.321	0.4012	6.09	2.469	0.2393
PTPA	1.121	0.1642	9.253	2.47	0.2393
RSRC2	-1.101	-0.1393	8.989	-2.468	0.2393
RGS5	1.235	0.3042	6.194	2.469	0.2393
IZUMO3	1.216	0.2822	2.372	2.467	0.2394
SIPA1L3	-1.205	-0.2689	8.764	-2.467	0.2394
GAPVD1	-1.151	-0.2032	9.005	-2.467	0.2394
KRT13	-1.655	-0.7269	8.499	-2.466	0.2394
LOC107985208	-1.29	-0.367	5.917	-2.465	0.2395
CFHR3	1.386	0.4706	4.12	2.465	0.2395
EN2	-1.326	-0.407	3.663	-2.466	0.2395
HIC2	1.692	0.7587	3.911	2.464	0.2395
LINC01658	-1.258	-0.3308	2.997	-2.466	0.2395
NHLH2	1.259	0.3321	3.236	2.465	0.2395
SEMA4C	1.174	0.2312	6.777	2.465	0.2395
RPL37	-1.11	-0.1505	10.84	-2.464	0.2395
FBXL14	1.119	0.1616	9.459	2.462	0.2403
TKTL2	-1.263	-0.3363	3.572	-2.462	0.2403
CIC	-1.191	-0.2527	6.265	-2.461	0.2405
LOC100133211	-1.369	-0.4531	4.829	-2.461	0.2407
SH2B2	1.263	0.3372	2.86	2.46	0.2409
CREM	1.163	0.2179	7.459	2.457	0.2421
PTCRA	-1.301	-0.3793	5.031	-2.456	0.2421
KDSR	1.147	0.1973	7.992	2.456	0.2421
UBE2J1	1.114	0.156	8.993	2.456	0.2421
TMEM40	1.138	0.1863	8.386	2.457	0.2421
EFL1	1.22	0.287	7.947	2.457	0.2421
ADGRV1	-1.477	-0.5626	6.719	-2.456	0.2421
SUSD3	1.317	0.3972	5.69	2.454	0.2422
MACF1	-1.211	-0.2757	9.372	-2.454	0.2422
2005-03-01	1.143	0.1925	8.504	2.455	0.2422
VCP	-1.098	-0.1354	10.45	-2.454	0.2422
PRR3	1.203	0.2667	6.183	2.454	0.2422
PNPLA4	-1.274	-0.3494	6.845	-2.454	0.2422
TRADD	1.173	0.2304	8.23	2.455	0.2422
UBE2M	1.194	0.2553	8.362	2.452	0.2428
PXK	1.141	0.1904	8.573	2.451	0.2434
ANK1	1.354	0.4375	5.566	2.45	0.2436
SARAF	-1.137	-0.1855	8.674	-2.45	0.2436
PHF10	-1.136	-0.1837	8.378	-2.45	0.2436
SMARCA4	-1.184	-0.2435	8.255	-2.448	0.2442
PIM2	1.165	0.2204	8.842	2.446	0.2445
DNAH5	-1.311	-0.391	9.8	-2.446	0.2445
IGFBP2	-1.184	-0.2431	10.69	-2.446	0.2445
GREB1L	-1.369	-0.4531	3.367	-2.447	0.2445
SMG7	1.13	0.1764	9.618	2.447	0.2445
OR8H1	1.318	0.3986	2.592	2.446	0.2447
ZNF426	1.251	0.3231	6.162	2.445	0.2449
EEF1A1P5	-1.16	-0.2145	11.03	-2.443	0.2453
GSK3B	-1.142	-0.192	9.14	-2.443	0.2453
MLLT1	-1.172	-0.2286	6.919	-2.444	0.2453
BANP	-1.207	-0.2711	8.688	-2.444	0.2453
PPP1R11	1.13	0.1765	9.292	2.444	0.2453
CHST11	1.139	0.188	9.173	2.442	0.2457
VENTX	-1.294	-0.3721	4.948	-2.442	0.2458
ALDH1A1	-1.142	-0.1917	11.65	-2.441	0.2459
RBM47	1.112	0.1529	9.949	2.441	0.2459
ALDH1L1	-1.182	-0.2414	6.439	-2.44	0.2463
ZNF689	1.181	0.2405	6.555	2.439	0.2463
DLG1	-1.093	-0.1289	9.565	-2.439	0.2463
DCP1A	1.421	0.5073	5.718	2.44	0.2463
NAXE	-1.14	-0.1891	8.683	-2.437	0.2468
DOCK9	-1.156	-0.2097	7.671	-2.437	0.2468
GLTPD2	1.315	0.3953	5.064	2.437	0.2468
NAB2	-1.353	-0.436	5.32	-2.437	0.2468
TSNAXIP1	-1.161	-0.2151	8.504	-2.437	0.2468
LOXL3	-1.219	-0.2856	3.989	-2.438	0.2468
TMEM187	1.192	0.2533	6.426	2.436	0.2469
SMYD5	1.188	0.2482	7.453	2.435	0.2474
KIAA1958	-1.275	-0.3501	6.039	-2.434	0.2476
DUSP26	-1.32	-0.401	3.75	-2.434	0.2476
GAN	-1.274	-0.3489	6.772	-2.434	0.2476
KIF23	-1.326	-0.4067	6.217	-2.433	0.248
PPFIA3	-1.342	-0.4247	2.585	-2.432	0.2482
MYL12B	-1.096	-0.1319	11.46	-2.431	0.2483
DCAF12	1.117	0.16	9.524	2.431	0.2483
NKX3-1	1.276	0.3514	6.338	2.431	0.2483
PFDN1	1.172	0.229	7.726	2.431	0.2483
DCLK1	-1.341	-0.4236	4.087	-2.432	0.2483
SSSCA1	1.133	0.1803	8.2	2.43	0.2484
NACC1	1.123	0.1676	8.768	2.43	0.2484
LCE2D	-1.241	-0.3121	5.462	-2.429	0.2486
SLC30A8	1.271	0.3463	3.202	2.427	0.2494
DSG3	-1.306	-0.3855	8.381	-2.427	0.2494
SAT1	1.086	0.1185	11.61	2.427	0.2494
CCDC130	-1.187	-0.2473	6.447	-2.427	0.2494
MRVI1	-1.382	-0.4663	4.512	-2.424	0.2503
GCH1	1.418	0.5041	6.909	2.424	0.2503
TSPAN13	1.142	0.1922	9.721	2.423	0.2503
MYO1H	1.189	0.2494	2.58	2.424	0.2503
C11orf87	-1.205	-0.2693	2.882	-2.424	0.2503
LARS	-1.173	-0.2296	7.911	-2.424	0.2503
ALG3	1.131	0.177	9.942	2.422	0.2508
PPIP5K2	-1.134	-0.1818	8.118	-2.42	0.2519
FZD8	1.257	0.3298	6.792	2.42	0.2519
ADSS	-1.109	-0.1487	8.991	-2.418	0.252
EDA	-1.29	-0.3676	5.001	-2.418	0.252
DKK1	1.605	0.6828	4.994	2.418	0.252
GRIK2	-1.512	-0.5961	4.235	-2.419	0.252
YOD1	1.19	0.2512	6.47	2.419	0.252
C10orf76	1.143	0.1922	7.793	2.419	0.252
DHX36	1.122	0.1658	7.767	2.417	0.2522
ANO10	-1.214	-0.2797	6.335	-2.417	0.2524
MROH1	-1.165	-0.2202	6.832	-2.417	0.2524
ADAM9	-1.104	-0.1433	9.408	-2.416	0.2525
C6orf99	-1.281	-0.3578	6.009	-2.415	0.2526
HNRNPR	-1.106	-0.1456	9.411	-2.415	0.2526
SRXN1	1.269	0.3437	6.387	2.415	0.2526
HMSD	1.418	0.5037	3.805	2.415	0.2526
TMEM165	1.203	0.2665	8.819	2.414	0.253
ATXN7L2	1.351	0.4341	4.666	2.412	0.2537
OR5H14	-1.554	-0.6361	2.189	-2.412	0.2537
HIST1H2AM	1.247	0.3181	8.563	2.411	0.2543
PARD6G	-1.383	-0.4681	4.97	-2.41	0.2545
FKBP9	-1.14	-0.1895	9.856	-2.409	0.2548
PLEKHA1	-1.125	-0.1702	8.551	-2.408	0.2553
SAXO2	-1.128	-0.1731	10.37	-2.406	0.256
NECTIN2	1.202	0.2654	9.28	2.406	0.256
TMEM117	-1.222	-0.2894	6.404	-2.406	0.256
CLEC2B	1.431	0.5168	6.537	2.404	0.2568
FAM46B	-1.272	-0.3467	5.523	-2.404	0.2569
ZNF267	1.19	0.2509	7.755	2.403	0.257
SEMA5B	-1.307	-0.3858	4.334	-2.403	0.257
NBEAL1	-1.221	-0.288	6.767	-2.403	0.257
PITRM1	-1.158	-0.2122	7.992	-2.402	0.2572
LOC107986776	1.272	0.3467	2.331	2.402	0.2572
HPX	-1.258	-0.3312	5.434	-2.402	0.2572
COL21A1	-1.311	-0.391	7.398	-2.402	0.2572
PCDH1	-1.117	-0.1598	8.674	-2.4	0.2574
TSKS	-1.366	-0.4501	3.579	-2.401	0.2574
SLK	-1.098	-0.1342	10.17	-2.4	0.2574
CEP164	-1.187	-0.2478	7.662	-2.4	0.2575
PPEF2	1.213	0.2781	2.878	2.4	0.2575
TOM1L2	-1.153	-0.205	7.924	-2.398	0.258
ZNF483	-1.35	-0.4327	5.352	-2.397	0.2583
MYH4	-1.282	-0.358	2.552	-2.397	0.2583
ERRFI1	1.248	0.3193	10.72	2.398	0.2583
RPL3	-1.156	-0.2089	11.39	-2.397	0.2583
NECTIN1	-1.188	-0.2487	8.035	-2.397	0.2584
OPN5	1.253	0.3256	3.345	2.396	0.2585
PABPC1	-1.127	-0.173	10.12	-2.396	0.2585
SPATA21	-1.386	-0.4706	3.215	-2.396	0.2585
KCNG3	-1.294	-0.3715	3.061	-2.394	0.2589
SLC26A2	-1.258	-0.3313	7.633	-2.394	0.2589
UFSP2	-1.186	-0.2463	6.428	-2.394	0.2589
PLXDC1	-1.167	-0.2229	7.894	-2.394	0.2589
CYFIP1	-1.14	-0.1891	8.045	-2.393	0.2591
STK11IP	-1.149	-0.2003	7.886	-2.391	0.2593
ZNF718	-1.283	-0.3591	3.939	-2.391	0.2593
XCR1	1.29	0.3673	4.251	2.392	0.2593
GRB10	-1.297	-0.3748	5.051	-2.391	0.2593
OR52B6	1.327	0.4081	3.299	2.39	0.2593
LOC401357	-1.333	-0.4147	4.533	-2.393	0.2593
HSBP1L1	-1.12	-0.1638	8.677	-2.392	0.2593
NDUFS5	-1.13	-0.1769	9.718	-2.39	0.2593
HOMEZ	1.114	0.1558	8.642	2.391	0.2593
PTX3	1.337	0.4189	3.759	2.39	0.2593
ARL14EPL	1.268	0.3424	2.529	2.39	0.2593
N4BP2L1	-1.572	-0.6524	4.616	-2.391	0.2593
MERTK	1.183	0.2422	7.013	2.387	0.2595
PUSL1	-1.18	-0.2384	5.852	-2.388	0.2595
DCP2	1.185	0.2446	6.927	2.388	0.2595
ECHS1	1.127	0.172	8.561	2.388	0.2595
ELMOD2	-1.117	-0.1599	8.541	-2.389	0.2595
TAS2R19	-1.469	-0.5551	4.086	-2.386	0.2595
HADH	-1.161	-0.2157	8.387	-2.387	0.2595
IMPDH1	-1.239	-0.309	6.389	-2.388	0.2595
PNPO	1.139	0.1871	7.639	2.386	0.2595
SLC22A15	-1.231	-0.2997	6.662	-2.388	0.2595
KIAA1257	-1.173	-0.2303	7.219	-2.388	0.2595
2007-03-01	-1.075	-0.1046	9.807	-2.386	0.2595
QSER1	-1.155	-0.2074	7.68	-2.387	0.2595
ZNF764	-1.27	-0.345	6.084	-2.387	0.2595
MARK2	1.141	0.1908	8.651	2.386	0.2596
TAMM41	-1.261	-0.3351	6.068	-2.385	0.2598
TMEM109	1.102	0.1399	9.727	2.385	0.2598
BMP2K	-1.124	-0.1693	8.77	-2.384	0.2599
NEUROD6	1.249	0.3206	2.925	2.384	0.2599
FOXP2	-1.143	-0.1927	7.449	-2.384	0.2599
KIAA0753	-1.192	-0.2529	7.391	-2.384	0.2599
MSLN	-1.146	-0.1964	9.422	-2.383	0.26
NDUFAF8	-1.321	-0.4018	7.816	-2.383	0.26
PRH1-TAS2R14	-1.436	-0.5222	6.7	-2.382	0.2602
EPHA1	-1.313	-0.3926	3.957	-2.382	0.2602
NTSR1	-1.289	-0.3662	3.556	-2.382	0.2602
FAM92A	-1.205	-0.2689	7.709	-2.381	0.2606
SNRNP25	-1.204	-0.2681	6.878	-2.38	0.2611
SATB1	-1.123	-0.1679	8.808	-2.379	0.2613
TAS2R30	-1.445	-0.5315	5.14	-2.378	0.2616
S100A13	-1.246	-0.3169	7.753	-2.378	0.2616
PHLPP2	1.311	0.3906	5.88	2.378	0.2617
TRHDE	-1.376	-0.4605	2.492	-2.378	0.2617
ABCA9	-1.326	-0.4072	4.265	-2.376	0.2618
KCTD6	1.22	0.2874	5.664	2.377	0.2618
STEAP1B	1.565	0.6462	4.18	2.377	0.2618
DUSP23	1.131	0.1776	8.318	2.376	0.2618
TCIRG1	1.124	0.1686	9.619	2.375	0.2619
AP4B1	1.283	0.3596	5.85	2.375	0.2619
[truncated: 16,621 more rows]
