# Supplementary material for: Polarized Entry of Human Parechoviruses in the Airway Epithelium
Source: Front Cell Infect Microbiol. 2018 Aug 22;8:294. doi: 10.3389/fcimb.2018.00294 (PMC6119779; doi:10.3389/fcimb.2018.00294)
Supplement: Supplementary file 4 [file Table_2.XLS]

## Sheet: Sheet1
Supplementary Table 2. All differentially expressed genes in HPeV3-infected HAE versus the mock.
Fold change (FC), Log2 FC (logFC), Average expression (AveExprs), t-statistics (t), Adjusted p value (adj.P.Val)
Genes	FC	logFC	AveExprs	t	adj.P.Val
MX1	7.849	2.972	11.31	48.16	3.341e-17
CMPK2	34.43	5.106	8.509	46.3	3.523e-17
IFIT1	52.04	5.702	9.806	44.68	3.68e-17
MX2	17.58	4.136	9.691	44.54	3.68e-17
IFI44L	103.4	6.693	8.627	41.11	1.011e-16
IFI6	7.157	2.839	11.66	41.52	1.011e-16
RSAD2	31.66	4.984	7.877	41.01	1.011e-16
IFIT2	85.64	6.42	9.305	39.29	1.767e-16
OAS2	13.35	3.739	9.816	39.36	1.767e-16
OAS3	20.2	4.336	8.706	38.81	1.826e-16
STAT1	5.513	2.463	10.67	38.95	1.826e-16
CXCL10	174.6	7.448	8.752	38.06	2.425e-16
HERC6	9.425	3.236	9.074	37.89	2.434e-16
XAF1	12	3.585	9.939	37.2	3.211e-16
PARP9	5.076	2.344	9.926	35.1	8.964e-16
IFI27	5.413	2.437	11.42	34.28	1.315e-15
IFITM1	8.422	3.074	11.09	32.8	2.854e-15
UBE2L6	4.681	2.227	10.78	32.53	3.149e-15
OAS1	14.77	3.885	10.52	32.19	3.619e-15
USP18	8.714	3.123	9.451	32.09	3.639e-15
LAMP3	9.837	3.298	9.55	32.01	3.639e-15
LAP3	3.769	1.914	10.83	31.92	3.675e-15
SAMD9L	13.09	3.711	9.77	31.46	4.63e-15
SP110	5.639	2.495	9.904	31.36	4.688e-15
OASL	44.28	5.469	8.828	29.66	1.287e-14
DDX60	5.812	2.539	8.749	29.33	1.525e-14
GBP1	6.361	2.669	9.101	28.26	2.947e-14
IFI44	9.548	3.255	8.013	27.92	3.568e-14
BST2	7.109	2.83	8.731	27.63	4.108e-14
DDX60L	12.24	3.613	8.37	27.61	4.108e-14
DDX58	9.844	3.299	8.908	27.23	5.137e-14
SAMD9	5.381	2.428	10.29	27.02	5.734e-14
ISG15	55.89	5.804	8.105	26.98	5.734e-14
EPSTI1	15.78	3.98	7.935	26.5	7.789e-14
IFIT3	35.9	5.166	10.1	26.17	9.356e-14
EIF2AK2	3.213	1.684	10.4	26.19	9.356e-14
TRANK1	4.153	2.054	8.255	26.08	9.654e-14
LY6E	2.658	1.41	11.68	25.97	1.02e-13
ETV7	8.537	3.094	6.861	25.89	1.053e-13
CXCL11	132.7	7.053	7.434	25.32	1.558e-13
RNF213	4.144	2.051	8.396	25.24	1.604e-13
IDO1	67.89	6.085	7.526	24.62	2.493e-13
RTP4	5.887	2.557	8.293	24.52	2.631e-13
IFIH1	9.035	3.176	9.175	24.31	3.026e-13
IFI35	7.368	2.881	8.442	23.71	4.696e-13
PARP14	4.062	2.022	10.37	23.63	4.893e-13
IFIT5	5.205	2.38	7.196	22.94	8.31e-13
TRIM14	3.14	1.651	8.954	22.74	9.578e-13
C19orf66	5.176	2.372	7.662	22.01	1.713e-12
DTX3L	3.642	1.865	9.118	21.8	2.004e-12
TAP1	6.51	2.703	7.551	21.63	2.262e-12
TRIM25	2.591	1.374	9.874	21.09	3.553e-12
DHX58	5.451	2.446	8.131	20.98	3.818e-12
CD38	3.716	1.894	10.36	20.82	4.311e-12
GBP4	9.617	3.266	7.791	20.61	5.098e-12
TRIM22	3.049	1.609	10.08	20.4	6.081e-12
PARP12	4.851	2.278	9.838	20.11	7.78e-12
IRF9	2.49	1.316	10.09	20	8.391e-12
IRF7	6.871	2.781	7.707	19.62	1.175e-11
ISG20	9.464	3.242	7.501	19.46	1.342e-11
APOL6	2.756	1.462	7.656	19.38	1.421e-11
TRIM21	4.342	2.118	7.977	19.31	1.495e-11
IFI16	2.489	1.316	10.47	18.84	2.317e-11
APOBEC3G	4.826	2.271	7.705	18.75	2.493e-11
HRASLS2	10.94	3.452	9.015	18.71	2.547e-11
PNPT1	3.22	1.687	8.72	18.38	3.48e-11
STAT2	4.101	2.036	8.797	18.36	3.481e-11
DUOX2	15.37	3.942	8.394	18.3	3.633e-11
XRN1	2.411	1.269	7.947	18.24	3.818e-11
TNFSF13B	26.73	4.741	6.374	18.21	3.859e-11
IRF1	2.601	1.379	8.788	18.14	4.091e-11
TMEM140	8.035	3.006	7.683	17.91	5.082e-11
HELZ2	5.91	2.563	6.23	17.85	5.306e-11
NMI	4.509	2.173	8.21	17.76	5.763e-11
RIPOR2	8.932	3.159	6.53	17.65	6.384e-11
APOBEC3F	2.788	1.479	8.862	17.62	6.491e-11
GBP5	13.46	3.751	6.411	17.52	7.103e-11
STS	3.085	1.625	8.738	17.39	8.004e-11
PSMB9	5.004	2.323	9.782	17.37	8.109e-11
HLA-F	6.773	2.76	9.411	17.19	9.58e-11
WARS	2.999	1.584	10.96	17.18	9.654e-11
PSMB8-AS1	3.674	1.877	7.067	17.15	9.794e-11
TAP2	4.558	2.188	8.234	17.12	1.001e-10
PLSCR1	3.265	1.707	10.03	17.08	1.026e-10
ZC3HAV1	2.395	1.26	9.41	16.93	1.194e-10
NUB1	2.762	1.466	9.667	16.84	1.294e-10
SLC25A28	4.544	2.184	6.971	16.66	1.548e-10
HSH2D	6.376	2.673	7.12	16.61	1.621e-10
TDRD7	2.643	1.402	8.463	16.58	1.634e-10
APOL1	3.069	1.618	9.413	16.59	1.634e-10
HERC5	21.03	4.395	6.774	16.48	1.806e-10
TRIM38	3.346	1.742	8.523	16.34	2.085e-10
GBP3	2.579	1.367	10.26	16.22	2.361e-10
DUOXA2	42.79	5.419	7.964	16.19	2.395e-10
LOC100419583	6.762	2.757	7.484	16.18	2.412e-10
SP100	3.173	1.666	8.423	15.81	3.622e-10
SPATS2L	2.096	1.068	10.99	15.7	4.024e-10
PPM1K	4.703	2.234	6.341	15.58	4.591e-10
STARD5	3.693	1.885	7.625	15.56	4.627e-10
ZNFX1	2.857	1.515	9.419	15.38	5.681e-10
OPTN	2.214	1.147	9.406	15.21	6.833e-10
PSMB8	2.674	1.419	9.797	15.2	6.885e-10
ZBP1	29.49	4.882	5.506	15.09	7.721e-10
CD68	8.838	3.144	8.007	14.97	8.802e-10
APOL4	3.607	1.851	6.932	14.87	9.8e-10
SULF2	-2.723	-1.445	9.439	-14.82	1.027e-09
TGM2	4.506	2.172	9.229	14.82	1.027e-09
IFITM2	1.784	0.8355	11.67	14.65	1.245e-09
LGALS9	3.522	1.816	9.922	14.61	1.298e-09
SIDT1	3.208	1.682	7.086	14.56	1.356e-09
SLFN5	2.297	1.2	10.3	14.54	1.388e-09
BIRC3	7.006	2.809	8.81	14.42	1.582e-09
CXCL14	-5.754	-2.525	8.078	-14.35	1.721e-09
BATF2	7.193	2.847	6.687	14.31	1.785e-09
TMEM268	2.375	1.248	8.773	14.26	1.874e-09
PATL2	4.129	2.046	7.078	14.19	2.039e-09
FBXO6	2.564	1.358	7.875	14.17	2.057e-09
SERPING1	9.795	3.292	7.184	14.11	2.197e-09
HLA-E	3.042	1.605	10.16	14.07	2.297e-09
CD274	6.494	2.699	6.817	14.03	2.387e-09
C1GALT1	2.181	1.125	8.152	13.91	2.749e-09
CX3CL1	2.21	1.144	10.12	13.91	2.749e-09
KLHDC7B	4.364	2.126	6.645	13.89	2.78e-09
FAM46A	3.593	1.845	7.106	13.82	3.039e-09
GTPBP2	2.756	1.463	8.357	13.81	3.053e-09
PIK3AP1	2.829	1.5	7.183	13.68	3.561e-09
TYMP	3.079	1.622	8.612	13.54	4.191e-09
PARP8	2.894	1.533	9.345	13.48	4.506e-09
RABGAP1L	2.21	1.144	8.469	13.46	4.608e-09
RBMS2	2.345	1.23	9.362	13.39	4.992e-09
TNFAIP2	6.908	2.788	9.017	13.32	5.462e-09
CASP1	4.813	2.267	6.302	13.28	5.668e-09
NFE2L3	4.139	2.049	8.263	13.27	5.692e-09
HLA-B	2.576	1.365	11.14	13.22	6.023e-09
CEACAM1	6.195	2.631	9.783	13.22	6.023e-09
HDAC9	3.642	1.865	8.353	13.19	6.228e-09
RARRES3	1.74	0.7991	10.16	13.17	6.317e-09
UBA7	2.325	1.217	8.572	13.17	6.317e-09
CMTR1	2.345	1.23	8.289	13.15	6.404e-09
SMCHD1	2.681	1.423	7.326	13.13	6.432e-09
FRMD3	12.08	3.595	6.647	13.13	6.432e-09
TOR1B	4.365	2.126	8.036	13.14	6.432e-09
TLR3	3.538	1.823	8.838	13.13	6.432e-09
PARP10	2.849	1.511	6.995	13.07	6.836e-09
PML	3.435	1.78	9.388	13	7.455e-09
RASGRP3	12.09	3.596	5.392	12.99	7.578e-09
RNF114	2.141	1.099	9.041	12.85	9.069e-09
GSDMB	3.477	1.798	8.819	12.78	9.797e-09
ACE2	4.057	2.02	6.85	12.75	1.014e-08
CFLAR	1.737	0.7969	11.35	12.75	1.014e-08
EXT1	2.299	1.201	9.444	12.73	1.033e-08
PATL1	2.231	1.158	8.996	12.71	1.059e-08
CD47	2.224	1.153	9.211	12.69	1.085e-08
TNFSF10	1.838	0.8779	11.71	12.68	1.086e-08
BCL2L14	3.859	1.948	6.105	12.61	1.192e-08
NUPR1	1.866	0.9	11.54	12.59	1.212e-08
HLA-C	2.561	1.357	10.58	12.56	1.247e-08
CYBRD1	-3.131	-1.647	6.734	-12.46	1.423e-08
VTCN1	-2.603	-1.38	8.165	-12.36	1.621e-08
LGALS3BP	2.323	1.216	10.86	12.32	1.707e-08
APOL2	2.597	1.377	8.223	12.32	1.709e-08
SOD2	3.272	1.71	10.35	12.25	1.873e-08
TMEM62	2.495	1.319	7.379	12.22	1.932e-08
CASP10	3.18	1.669	7.191	12.2	1.99e-08
MYD88	2.645	1.403	9.72	12.19	2.004e-08
CYP2J2	2.16	1.111	8.963	12.15	2.095e-08
ZFYVE26	2.054	1.039	7.459	12.14	2.102e-08
NT5C3A	4.911	2.296	7.657	12.09	2.26e-08
IKBKE	3.609	1.852	8.614	11.98	2.625e-08
ADAM28	3.037	1.603	8.164	11.94	2.748e-08
ITGB6	-2.015	-1.011	7.515	-11.92	2.796e-08
AMBRA1	1.859	0.8949	9.06	11.92	2.796e-08
ITGAV	-2.423	-1.277	7.983	-11.89	2.888e-08
TRIB2	3.151	1.656	7.709	11.86	2.989e-08
IGFBP3	2.997	1.584	10.62	11.86	2.989e-08
PSMB10	2.153	1.106	8.327	11.83	3.091e-08
SERPINB3	-2.014	-1.01	11.14	-11.83	3.105e-08
IL18BP	3.953	1.983	7.238	11.81	3.182e-08
VNN3	3.492	1.804	7.93	11.8	3.197e-08
TNFRSF14-AS1	2.075	1.053	7.391	11.76	3.373e-08
GMPR	3.822	1.934	8.121	11.69	3.687e-08
SCLT1	2.001	1.001	7.217	11.69	3.703e-08
LIFR	4.637	2.213	6.422	11.65	3.872e-08
DST	-1.632	-0.7069	9.371	-11.62	4.047e-08
AKR1C2	-2.493	-1.318	10.33	-11.59	4.198e-08
NT5DC2	-2.477	-1.308	8.186	-11.55	4.391e-08
CFH	2.659	1.411	9.336	11.53	4.492e-08
CSF1	5.709	2.513	6.515	11.51	4.649e-08
TRIM31	15.17	3.923	6.107	11.5	4.706e-08
SECTM1	4.996	2.321	7.568	11.41	5.306e-08
ZC3H12A	3.55	1.828	9.265	11.4	5.306e-08
TRIM5	3.946	1.98	7.369	11.41	5.306e-08
NFKBIA	2.455	1.296	9.923	11.36	5.614e-08
TLE3	-1.892	-0.9197	7.278	-11.34	5.776e-08
STX11	3.108	1.636	8.121	11.32	5.87e-08
JAK2	2.108	1.076	7.521	11.31	5.966e-08
HESX1	5.847	2.548	5.519	11.27	6.34e-08
PTGFR	-3.505	-1.809	6.851	-11.26	6.364e-08
SAA1	2.909	1.541	11.62	11.25	6.454e-08
RHBDF2	2.428	1.28	8.67	11.24	6.454e-08
CD36	-5.395	-2.432	7.886	-11.23	6.601e-08
IRAK3	3.066	1.616	9.184	11.21	6.683e-08
C6orf62	1.549	0.6314	10.02	11.21	6.721e-08
CCL20	10.12	3.34	8.782	11.19	6.807e-08
HTR2B	5.09	2.348	6.032	11.15	7.215e-08
RFX5	2.133	1.093	8.707	11.14	7.293e-08
LMO2	2.523	1.335	7.785	11.11	7.597e-08
GBP2	4.254	2.089	6.962	11.09	7.874e-08
ARHGAP26	1.865	0.8989	9.012	11.07	7.987e-08
TLR2	5.05	2.336	7.274	11.06	8.055e-08
SP140L	2.409	1.268	6.973	11.06	8.055e-08
SLC6A20	2.146	1.101	9.394	11.03	8.376e-08
MLKL	5.769	2.528	5.593	11.01	8.595e-08
TCF4	1.485	0.57	9.521	11	8.645e-08
AIM2	6.21	2.634	5.078	10.99	8.819e-08
TPD52L1	-2.976	-1.573	8.706	-10.95	9.367e-08
BTN2A2	2.128	1.089	8.523	10.92	9.677e-08
CDH6	-4.468	-2.16	5.703	-10.89	1.014e-07
NCOA7	3.482	1.8	9.927	10.87	1.032e-07
CXCL8	5.544	2.471	8.907	10.85	1.063e-07
PRKD2	2.183	1.126	8.611	10.82	1.115e-07
APOBEC3A	17.12	4.098	8.183	10.8	1.134e-07
CFB	3.038	1.603	11.4	10.8	1.134e-07
TNFAIP3	2.023	1.016	11.22	10.79	1.145e-07
SULT2B1	-2.586	-1.371	8.971	-10.78	1.157e-07
HLA-DQB1	2.473	1.306	8.235	10.77	1.172e-07
SLC25A6	-1.58	-0.6601	10.95	-10.76	1.185e-07
HLA-G	2.674	1.419	7.507	10.69	1.304e-07
SLC15A3	4.338	2.117	6.129	10.69	1.304e-07
FN1	-3.186	-1.672	9.556	-10.66	1.356e-07
HCP5	4.929	2.301	7.515	10.65	1.373e-07
DSC2	-3.264	-1.707	8.327	-10.65	1.373e-07
C21orf91	2.657	1.41	8.164	10.64	1.387e-07
BTN3A1	2.884	1.528	7.28	10.63	1.396e-07
SERPINE2	-3.068	-1.617	7.389	-10.6	1.463e-07
RPL5	-1.683	-0.7513	10.62	-10.6	1.463e-07
RAB7B	-3.347	-1.743	6.461	-10.53	1.62e-07
HOMER2	-1.922	-0.9422	8.644	-10.51	1.67e-07
GTPBP1	1.942	0.9572	7.955	10.51	1.67e-07
EHD4	2.248	1.169	8.556	10.45	1.807e-07
CCL5	20.41	4.351	6.572	10.45	1.807e-07
ERAP2	3.899	1.963	5.094	10.43	1.867e-07
HACD3	-1.625	-0.7006	9.498	-10.42	1.878e-07
XDH	5.717	2.515	6.868	10.42	1.878e-07
TNFRSF10D	-2.386	-1.254	6.518	-10.42	1.878e-07
CTSS	1.513	0.5976	10.9	10.4	1.918e-07
ADAR	2.177	1.123	8.283	10.37	2.009e-07
CXCL16	2.011	1.008	9.651	10.35	2.047e-07
SESN3	-4.767	-2.253	5.53	-10.34	2.066e-07
WDFY1	1.912	0.9352	8.743	10.34	2.066e-07
KLF4	2.122	1.085	7.234	10.34	2.066e-07
MAGED1	-1.778	-0.8303	8.885	-10.33	2.093e-07
PTGR1	-1.742	-0.8007	8.658	-10.3	2.191e-07
CLDN8	-3.935	-1.976	5.192	-10.29	2.196e-07
NDUFC1	1.806	0.8527	8.658	10.29	2.21e-07
ANKFY1	1.704	0.769	8.544	10.27	2.257e-07
CIITA	2.838	1.505	8.543	10.27	2.263e-07
ATP6V1C2	-2.1	-1.071	8.131	-10.24	2.345e-07
RNF19B	1.812	0.8579	8.95	10.24	2.359e-07
QKI	1.757	0.8134	8.78	10.21	2.446e-07
CEBPZOS	-1.653	-0.7251	8.711	-10.18	2.545e-07
SQOR	2.089	1.063	9.15	10.18	2.567e-07
COMMD6	-1.595	-0.6734	8.827	-10.17	2.592e-07
PABPC1	-1.663	-0.7342	10.12	-10.17	2.592e-07
CASP4	1.49	0.5756	10.28	10.16	2.608e-07
IFNL1	12.38	3.631	6.121	10.15	2.641e-07
LAPTM4B	-1.715	-0.7782	8.927	-10.15	2.649e-07
IL2RG	6.327	2.662	7.589	10.14	2.65e-07
HK1	-1.84	-0.8796	8.74	-10.13	2.691e-07
MUC13	7.159	2.84	8.76	10.1	2.824e-07
TSPAN7	-3.86	-1.948	7.509	-10.09	2.867e-07
MUC15	1.452	0.5384	10.97	10.07	2.948e-07
MT1L	-2.187	-1.129	10.33	-10.01	3.222e-07
LYN	1.99	0.9931	9.633	10	3.244e-07
TNC	-4.528	-2.179	7.428	-9.994	3.283e-07
FAM122C	1.747	0.8045	8.04	9.97	3.4e-07
BMP3	2.426	1.279	6.588	9.966	3.412e-07
ALDH3A2	-1.558	-0.6399	9.562	-9.96	3.435e-07
TMEM63C	-2.353	-1.234	6.365	-9.946	3.502e-07
APOBEC3D	2.403	1.265	7.316	9.895	3.788e-07
LDLR	2.27	1.183	9.818	9.889	3.813e-07
BRIP1	8.121	3.022	4.798	9.884	3.831e-07
GPX2	-2.385	-1.254	9.493	-9.866	3.931e-07
HS3ST1	2.404	1.265	8.109	9.864	3.931e-07
TAGAP	2.927	1.549	6.426	9.849	4.014e-07
GLRX	2.024	1.017	9.024	9.845	4.014e-07
HNF4G	1.938	0.9547	7.331	9.843	4.014e-07
TAPBP	1.605	0.6829	10.59	9.843	4.014e-07
ADA2	-1.562	-0.6436	10.04	-9.835	4.052e-07
SELL	3.239	1.696	5.757	9.83	4.067e-07
DOCK4	2.097	1.069	6.854	9.823	4.1e-07
TRIM26	1.696	0.7619	8.592	9.816	4.135e-07
TRAFD1	2.009	1.006	8.783	9.802	4.216e-07
ST14	1.461	0.547	10.96	9.793	4.267e-07
HLA-DOA	3.409	1.769	7.656	9.781	4.336e-07
ITM2C	-1.448	-0.534	9.962	-9.75	4.552e-07
KRT39	6.031	2.592	4.56	9.746	4.561e-07
IL1A	5.286	2.402	7.739	9.735	4.634e-07
ADRB2	2.607	1.383	7.285	9.728	4.668e-07
LRG1	1.809	0.8548	8.12	9.719	4.678e-07
CCL28	2.803	1.487	8.427	9.719	4.678e-07
SLC13A3	2.229	1.157	6.464	9.717	4.678e-07
SH3TC2	4.379	2.131	6.574	9.72	4.678e-07
UNC93B1	1.384	0.4684	10.88	9.723	4.678e-07
DLX5	-3.457	-1.79	6.58	-9.713	4.696e-07
CNP	2.43	1.281	8.048	9.705	4.742e-07
PRDX2	-1.627	-0.7024	9.403	-9.696	4.799e-07
PLXDC2	-2.926	-1.549	6.053	-9.686	4.862e-07
CTSV	-3.457	-1.789	7.007	-9.681	4.887e-07
PPARGC1A	-2.069	-1.049	7.895	-9.663	5.019e-07
HLA-A	2.664	1.414	10.09	9.655	5.064e-07
RPL4	-1.534	-0.6171	10.45	-9.654	5.064e-07
HLA-DMA	1.833	0.8743	10.96	9.645	5.094e-07
SLFN12	1.954	0.9664	7.156	9.644	5.094e-07
TENM2	-2.437	-1.285	7.006	-9.645	5.094e-07
SLC7A11	2.284	1.191	7.273	9.638	5.117e-07
RPS21	-1.48	-0.5652	10.86	-9.638	5.117e-07
N4BP1	1.641	0.7147	10.65	9.635	5.126e-07
AKR1C3	-1.897	-0.924	8.95	-9.626	5.184e-07
PLEKHA7	1.548	0.63	8.825	9.584	5.549e-07
PDCD4	-1.653	-0.725	8.757	-9.582	5.55e-07
TMEM64	-2.267	-1.181	6.509	-9.528	6.053e-07
STMN1	-1.966	-0.9754	6.398	-9.52	6.114e-07
KRT5	-2.043	-1.031	11.84	-9.512	6.176e-07
DCAKD	-1.368	-0.4517	10.71	-9.447	6.877e-07
RNF128	-3.37	-1.753	5.69	-9.415	7.235e-07
TJP3	1.48	0.5658	9.212	9.408	7.294e-07
CDC42EP1	2.974	1.572	7.842	9.399	7.371e-07
YPEL3	-1.395	-0.4801	9.856	-9.398	7.371e-07
SLC9A8	1.537	0.6201	8.844	9.356	7.89e-07
APOL3	3.029	1.599	6.467	9.352	7.926e-07
FMR1	1.483	0.5681	8.681	9.35	7.933e-07
DIRC2	-1.637	-0.7114	8.823	-9.335	8.102e-07
OGFR	1.697	0.7626	8.793	9.329	8.145e-07
FAS	2.03	1.022	8.172	9.329	8.145e-07
UBD	2.949	1.56	6.099	9.311	8.352e-07
VIM	-2.535	-1.342	8.516	-9.311	8.352e-07
GJA1	-4.425	-2.146	7.61	-9.308	8.369e-07
MXD4	-1.688	-0.7553	9.293	-9.261	9.033e-07
GPD1L	-1.759	-0.8151	7.965	-9.257	9.065e-07
PERP	-1.49	-0.5757	10.74	-9.255	9.07e-07
CAPN13	-1.53	-0.6138	10.68	-9.246	9.186e-07
GCNT4	2.074	1.053	6.856	9.242	9.221e-07
ADGRG1	-1.533	-0.6161	10.08	-9.233	9.349e-07
ACSL5	1.695	0.761	8.603	9.227	9.407e-07
SELENOP	-2.58	-1.368	6.577	-9.219	9.515e-07
LGALS1	-1.979	-0.9846	8.844	-9.217	9.519e-07
PSME2	2.017	1.012	7.544	9.175	1.02e-06
CCND3	1.709	0.7732	9.523	9.172	1.022e-06
CHST4	4.171	2.06	6.392	9.165	1.028e-06
CSF3	10.57	3.401	6.468	9.166	1.028e-06
PCGF5	2.412	1.27	7.503	9.15	1.053e-06
FGD2	4.139	2.049	5.686	9.147	1.055e-06
NFKBIZ	2.201	1.138	9.138	9.141	1.063e-06
ZNHIT1	-1.527	-0.6104	8.314	-9.138	1.067e-06
BMPR1A	1.571	0.6519	9.513	9.132	1.074e-06
CXCL1	2.681	1.423	9.275	9.11	1.109e-06
NDUFA2	-1.425	-0.5105	9.876	-9.112	1.109e-06
GLTP	-1.619	-0.6949	8.209	-9.101	1.123e-06
TFCP2L1	-2.538	-1.343	7.527	-9.098	1.127e-06
ELF5	-1.638	-0.7115	8.84	-9.08	1.155e-06
CDC25B	3.12	1.642	7.096	9.082	1.155e-06
DBN1	-2.307	-1.206	6.879	-9.065	1.183e-06
PDZK1IP1	4.586	2.197	9.809	9.059	1.191e-06
NDUFB8	-1.497	-0.5823	8.89	-9.056	1.195e-06
KIDINS220	-1.499	-0.5844	8.253	-9.052	1.199e-06
C1S	6.251	2.644	6.461	9.048	1.205e-06
TNIP1	2.086	1.061	8.586	9.038	1.223e-06
OR52N4	3.843	1.942	4.717	9.021	1.254e-06
MMP10	-3.148	-1.654	9.724	-9.02	1.254e-06
DAB2IP	1.718	0.7808	7.736	9.007	1.279e-06
HLA-DMB	2.556	1.354	6.614	8.99	1.315e-06
CYFIP2	-2.427	-1.279	6.511	-8.988	1.316e-06
PMAIP1	2.287	1.194	6.916	8.953	1.395e-06
GCA	2.502	1.323	6.708	8.937	1.429e-06
GNAL	-1.941	-0.9567	8.645	-8.935	1.432e-06
PHACTR4	1.972	0.98	8.998	8.922	1.458e-06
NLRC5	3.594	1.846	5.371	8.922	1.458e-06
NCOA2	1.459	0.5454	8.835	8.92	1.459e-06
CR1L	3.48	1.799	6.523	8.906	1.491e-06
DSC3	-2.434	-1.283	7.246	-8.895	1.515e-06
MICB	3.823	1.935	6.303	8.871	1.576e-06
MT1X	-2.204	-1.14	11.64	-8.865	1.59e-06
CARD16	2.607	1.382	6.86	8.853	1.618e-06
TGFBI	-3.242	-1.697	8.708	-8.847	1.632e-06
IL36G	4.921	2.299	7.558	8.841	1.646e-06
CLCA2	-3.692	-1.884	6.971	-8.832	1.667e-06
QARS	-1.54	-0.6228	8.805	-8.828	1.674e-06
RARRES1	4.23	2.081	9.535	8.825	1.68e-06
PDCD1LG2	5.039	2.333	5.838	8.815	1.704e-06
LYSMD2	2.178	1.123	5.979	8.81	1.716e-06
MDK	2.601	1.379	9.725	8.799	1.744e-06
FRK	1.495	0.5803	9.112	8.784	1.786e-06
UPK1B	-1.735	-0.7946	11.38	-8.779	1.799e-06
VAT1	-1.956	-0.968	7.697	-8.775	1.806e-06
KIAA0513	1.457	0.5431	9.744	8.769	1.82e-06
SLC26A4	18.74	4.228	6.493	8.767	1.823e-06
ABHD2	-1.517	-0.6011	10.6	-8.764	1.828e-06
RPL35A	-1.367	-0.4508	10.25	-8.749	1.872e-06
SELPLG	1.87	0.9031	6.845	8.748	1.872e-06
HLA-L	2.042	1.03	6.669	8.74	1.887e-06
LGMN	2.392	1.258	8.993	8.741	1.887e-06
B2M	1.572	0.6522	11.82	8.721	1.948e-06
PI4K2B	2.042	1.03	7.851	8.699	2.02e-06
LPAR1	1.629	0.7039	7.521	8.689	2.048e-06
IFNL3	4.589	2.198	6.458	8.689	2.048e-06
PLEKHA4	1.98	0.9852	5.95	8.685	2.057e-06
PSME1	1.575	0.6556	9.166	8.682	2.063e-06
GPX3	-1.833	-0.8742	8.832	-8.676	2.08e-06
RPS6	-1.577	-0.6568	10.43	-8.665	2.114e-06
PRDX6	-1.66	-0.7316	9.258	-8.655	2.148e-06
TMEM171	7.845	2.972	6.357	8.65	2.159e-06
GPX4	-1.432	-0.5185	10.81	-8.651	2.159e-06
PCYOX1	-1.711	-0.7748	8.674	-8.644	2.175e-06
CD9	-1.385	-0.4695	11.43	-8.637	2.197e-06
LPAR6	2.152	1.105	8.574	8.622	2.245e-06
RUBCN	1.94	0.9561	7.385	8.623	2.245e-06
FCHSD2	1.672	0.7417	9.063	8.613	2.278e-06
ATP10B	3.018	1.594	7.418	8.61	2.285e-06
MIR205HG	-1.64	-0.714	9.199	-8.608	2.286e-06
DAPP1	1.769	0.8229	8.623	8.602	2.307e-06
RNF19A	1.993	0.9947	7.225	8.6	2.309e-06
STON2	-1.672	-0.7417	7.492	-8.599	2.309e-06
TMPRSS3	1.64	0.7136	9.436	8.595	2.318e-06
SFXN3	-1.605	-0.6828	9.202	-8.589	2.337e-06
FAT2	-3.251	-1.701	7.505	-8.584	2.356e-06
C12orf57	-1.563	-0.6446	8.354	-8.573	2.384e-06
PTGS2	5.261	2.395	6.763	8.573	2.384e-06
EIF3F	-1.548	-0.6304	8.671	-8.574	2.384e-06
PZP	-1.978	-0.984	9.427	-8.564	2.419e-06
CD14	-2.494	-1.319	6.505	-8.558	2.438e-06
FYTTD1	1.626	0.7017	8.373	8.552	2.46e-06
IGFBP4	1.806	0.8529	7.474	8.548	2.472e-06
BTC	2.19	1.131	6.957	8.545	2.476e-06
PRKRA	-1.598	-0.6761	8.104	-8.541	2.491e-06
TNNC1	-2.41	-1.269	7.276	-8.526	2.552e-06
RRM1	-1.633	-0.7074	7.92	-8.52	2.573e-06
GPT2	2.245	1.167	6.963	8.518	2.577e-06
MYH9	-1.728	-0.7892	8.897	-8.512	2.599e-06
TMEM37	-2.206	-1.141	7.556	-8.499	2.647e-06
TLE4	1.473	0.5589	9.17	8.499	2.647e-06
RPL27	-1.413	-0.4986	8.833	-8.482	2.725e-06
CMYA5	2.15	1.105	4.817	8.458	2.842e-06
HK2	2.61	1.384	6.649	8.446	2.898e-06
CNTNAP2	-2.016	-1.012	6.283	-8.431	2.972e-06
CXCL3	4.993	2.32	6.913	8.427	2.984e-06
BCL3	1.689	0.7561	8.488	8.426	2.984e-06
NAPA	1.595	0.6734	9.946	8.425	2.984e-06
HLA-DPA1	2.517	1.332	9.732	8.422	2.992e-06
DYNLT1	1.41	0.4952	10.42	8.419	3.003e-06
PDK2	-1.556	-0.6377	9.809	-8.411	3.036e-06
LCN2	2.394	1.259	11.56	8.4	3.093e-06
SLC16A4	3.403	1.767	6.776	8.389	3.147e-06
TPM1	-2.016	-1.012	7.868	-8.387	3.153e-06
SLC5A8	2.801	1.486	5.968	8.379	3.193e-06
RPL15	-1.386	-0.4711	11.38	-8.377	3.197e-06
RPS24	-1.376	-0.46	11.09	-8.371	3.222e-06
FMO6P	-1.892	-0.92	7.977	-8.368	3.235e-06
GNB4	1.759	0.8146	7.826	8.366	3.24e-06
ACO1	-2.692	-1.428	6.816	-8.364	3.247e-06
EIF3L	-1.806	-0.8524	8.542	-8.354	3.298e-06
FMO2	-2.111	-1.078	7.1	-8.351	3.311e-06
ABLIM1	-1.717	-0.7796	11.08	-8.349	3.314e-06
HLA-DRB1	1.997	0.9978	10.35	8.342	3.349e-06
H2AFV	-1.694	-0.7605	8.966	-8.339	3.359e-06
HDX	2.576	1.365	5.868	8.333	3.387e-06
SLC46A3	-1.615	-0.6917	8.061	-8.33	3.387e-06
BCL11A	-2.009	-1.007	6.828	-8.33	3.387e-06
RPL23	-1.581	-0.6609	10.31	-8.33	3.387e-06
POSTN	-7.763	-2.957	4.882	-8.327	3.397e-06
HLA-DPB1	2.276	1.186	9.378	8.321	3.424e-06
ELOVL7	3.143	1.652	5.312	8.32	3.424e-06
ABCC5	-1.664	-0.7351	6.907	-8.315	3.45e-06
TMEM106A	3.047	1.607	6.711	8.314	3.45e-06
HLA-DQA1	3.541	1.824	10.34	8.309	3.468e-06
RPL37A	-1.317	-0.3976	11.68	-8.31	3.468e-06
AHNAK2	-2.069	-1.049	10.82	-8.305	3.477e-06
PRDM1	3.055	1.611	8.371	8.306	3.477e-06
NADK	1.942	0.9575	9.506	8.304	3.477e-06
HSDL2	-1.73	-0.7905	8.064	-8.301	3.489e-06
MOB3C	2.429	1.281	6.983	8.289	3.556e-06
GDA	1.619	0.6951	9.16	8.282	3.6e-06
FBXO7	1.419	0.505	9.855	8.278	3.614e-06
RPS23	-1.558	-0.64	9.968	-8.274	3.627e-06
SLC16A1	2.449	1.292	6.856	8.274	3.627e-06
MISP	1.53	0.6136	8.439	8.272	3.634e-06
EPHX1	-2.15	-1.104	10.71	-8.267	3.653e-06
IGFBP5	-3.146	-1.654	8.575	-8.267	3.653e-06
RPL7A	-1.521	-0.605	10.38	-8.263	3.67e-06
DHRS13	2.688	1.427	7.13	8.256	3.709e-06
CASTOR2	-1.806	-0.8527	8.364	-8.247	3.768e-06
CDK19	-1.885	-0.9146	6.588	-8.243	3.789e-06
RNF43	1.706	0.7702	7.796	8.233	3.849e-06
ACSL1	1.516	0.6001	9.021	8.225	3.896e-06
TTC39B	1.787	0.8372	7.053	8.184	4.19e-06
GRINA	1.354	0.4374	10.12	8.183	4.19e-06
FAXDC2	-1.552	-0.6345	9.029	-8.181	4.198e-06
MOV10	1.933	0.951	8.132	8.168	4.298e-06
ALDH1A1	-1.56	-0.6412	11.65	-8.166	4.303e-06
KRT15	-2.023	-1.017	8.164	-8.164	4.313e-06
IVNS1ABP	-1.565	-0.6459	8.617	-8.154	4.38e-06
PRRX2	2.344	1.229	5.755	8.153	4.38e-06
LRRC49	-1.817	-0.8614	7.998	-8.149	4.402e-06
GABARAP	-1.319	-0.3999	11.31	-8.146	4.415e-06
ICAM1	3.28	1.714	8.645	8.146	4.415e-06
SMARCA1	-1.518	-0.6024	7.334	-8.137	4.478e-06
HUNK	-2.317	-1.212	5.96	-8.126	4.551e-06
ZC3H12C	2.107	1.075	7.482	8.126	4.551e-06
PPP1R15B	1.419	0.505	8.551	8.119	4.599e-06
NFKB2	2.718	1.443	8.016	8.118	4.601e-06
TMEM27	4.398	2.137	5.144	8.116	4.605e-06
KRT23	2.403	1.265	8.371	8.114	4.619e-06
SUSD3	2.484	1.313	5.69	8.111	4.636e-06
PLXDC1	-1.687	-0.7544	7.894	-8.102	4.699e-06
SPNS2	2.744	1.456	6.56	8.09	4.794e-06
ERP27	-2.526	-1.337	6.773	-8.083	4.849e-06
BTN3A3	3.445	1.784	5.779	8.071	4.948e-06
BLZF1	2.048	1.034	8.94	8.063	5.018e-06
MATN2	-3.058	-1.612	6.957	-8.046	5.168e-06
TXNIP	1.612	0.6884	10.37	8.034	5.252e-06
SUSD4	-2.595	-1.376	7.164	-8.034	5.252e-06
ANKH	-2.635	-1.398	5.956	-8.036	5.252e-06
MYLK	-2.626	-1.393	7.337	-8.025	5.332e-06
SMPD3	1.727	0.7879	6.69	8.023	5.332e-06
BNIP3L	-1.507	-0.5921	10.28	-8.023	5.332e-06
LOC728743	2.526	1.337	5.759	8.018	5.368e-06
HHLA2	-1.606	-0.6834	8.409	-8.017	5.371e-06
ELF3	1.462	0.548	9.106	8.015	5.383e-06
TKT	-1.646	-0.719	9.572	-8.013	5.386e-06
TMX1	1.449	0.5348	8.83	8.013	5.386e-06
RPS16	-1.42	-0.5062	11.11	-8.003	5.477e-06
BCL2L15	4.408	2.14	6.539	8.001	5.48e-06
GPI	-1.692	-0.7587	8.536	-7.997	5.494e-06
MFGE8	-1.693	-0.7599	8.383	-7.997	5.494e-06
RPS25	-1.347	-0.4298	10.85	-7.998	5.494e-06
SLC11A2	2.413	1.271	8.083	7.993	5.528e-06
EIF4EBP2	-1.399	-0.4843	10.19	-7.991	5.532e-06
FAM3B	-2.501	-1.323	6.286	-7.988	5.557e-06
ATP10A	2.418	1.274	5.914	7.979	5.638e-06
CGAS	3.321	1.732	5.263	7.976	5.664e-06
NXT2	1.852	0.8891	7.96	7.974	5.669e-06
RELB	2.53	1.339	6.786	7.971	5.688e-06
JADE2	2.113	1.079	7.928	7.969	5.691e-06
CD44	-1.873	-0.9055	8.802	-7.969	5.691e-06
SORL1	-2.369	-1.244	6.501	-7.957	5.808e-06
PTAFR	2.36	1.239	8.43	7.954	5.838e-06
ADGRF4	-2.287	-1.193	5.701	-7.952	5.843e-06
MFAP2	-1.942	-0.9579	6.895	-7.951	5.843e-06
CNGA4	-1.743	-0.8017	9.166	-7.948	5.871e-06
HSD17B10	-1.734	-0.7942	6.732	-7.945	5.888e-06
PSMA6	1.864	0.8983	9.001	7.943	5.898e-06
HSD11B2	-3.935	-1.977	7.253	-7.941	5.914e-06
CERK	-2.052	-1.037	5.936	-7.931	6.01e-06
RPL37	-1.399	-0.484	10.84	-7.927	6.048e-06
FAM173B	-2.011	-1.008	7.18	-7.917	6.141e-06
TCEA3	-1.891	-0.9191	7.142	-7.917	6.141e-06
USP42	1.501	0.5864	8.047	7.916	6.143e-06
SLCO4C1	-1.943	-0.9585	9.044	-7.905	6.263e-06
C4orf19	2.523	1.335	7.867	7.897	6.346e-06
CD40	1.658	0.7292	7.512	7.88	6.535e-06
NAMPT	1.821	0.8648	8.217	7.878	6.543e-06
MYH10	-1.395	-0.4806	9.307	-7.879	6.543e-06
MB	-2.913	-1.542	7.395	-7.869	6.637e-06
MTURN	-1.805	-0.8516	7.175	-7.865	6.675e-06
PLEKHB1	-1.518	-0.6023	10.5	-7.863	6.693e-06
NT5E	4.352	2.122	6.632	7.859	6.73e-06
HSD17B4	-1.392	-0.4776	8.689	-7.838	6.989e-06
WBP1L	-1.501	-0.5854	9.751	-7.836	7.005e-06
ZBTB20	1.574	0.6547	9.548	7.814	7.284e-06
PSTPIP2	3.601	1.848	6.735	7.809	7.352e-06
CLU	-1.858	-0.894	9.112	-7.806	7.372e-06
ACP2	2.126	1.088	8.975	7.799	7.436e-06
TMCO3	-2.066	-1.047	7.886	-7.8	7.436e-06
SLC29A3	-1.745	-0.8029	7.296	-7.799	7.436e-06
FLRT2	-2.046	-1.033	5.155	-7.795	7.47e-06
IL15RA	2.279	1.188	7.008	7.795	7.47e-06
CTDSPL	-1.529	-0.6122	8.003	-7.788	7.557e-06
MSRB3	-1.915	-0.9373	6.15	-7.782	7.621e-06
STARD4	2.058	1.041	6.892	7.779	7.653e-06
BCL2A1	7.507	2.908	5.35	7.778	7.653e-06
FAM172A	-1.943	-0.9581	7.562	-7.773	7.713e-06
SLC37A2	-1.722	-0.7843	7.254	-7.766	7.775e-06
ATP6V0A1	-1.354	-0.437	9.447	-7.768	7.775e-06
PROS1	-3.744	-1.905	8.024	-7.767	7.775e-06
MAN1C1	-3.575	-1.838	6.148	-7.759	7.871e-06
MASTL	2.243	1.165	5.268	7.757	7.889e-06
FNDC3A	1.727	0.7883	8.205	7.751	7.963e-06
EFCAB10	-1.515	-0.5995	9.306	-7.743	8.079e-06
TNFRSF10A	2.174	1.12	7.119	7.737	8.15e-06
RDH10	-1.374	-0.4579	10.25	-7.736	8.159e-06
LAG3	3.562	1.833	5.62	7.734	8.175e-06
EFL1	1.87	0.903	7.947	7.729	8.235e-06
RFLNB	-2.967	-1.569	5.2	-7.721	8.341e-06
GSTA4	-2.133	-1.093	6.026	-7.719	8.371e-06
RIPK1	1.555	0.6373	7.783	7.714	8.429e-06
DNMBP	1.484	0.5695	8.699	7.711	8.464e-06
FOXN2	2.075	1.053	7.01	7.709	8.473e-06
ACOX1	-1.48	-0.5655	7.99	-7.709	8.473e-06
AMTN	-3.363	-1.75	6.56	-7.701	8.578e-06
RERG	-2.02	-1.014	6.797	-7.7	8.582e-06
IRAK2	3.891	1.96	5.477	7.697	8.62e-06
KCNJ2	1.958	0.9692	6.781	7.693	8.68e-06
RNPEP	-1.581	-0.6609	9.746	-7.692	8.683e-06
FAM13C	-1.92	-0.9408	6.432	-7.691	8.686e-06
PDE4D	2.053	1.038	7.109	7.688	8.709e-06
MGAT3	2	1	6.71	7.686	8.736e-06
MAP3K8	2.123	1.086	8.601	7.681	8.803e-06
NOX4	-2.696	-1.431	4.685	-7.666	9.035e-06
RAB27B	1.882	0.9119	7.457	7.66	9.132e-06
MGST3	-1.472	-0.5581	9.694	-7.658	9.152e-06
EOGT	-1.524	-0.6077	8.18	-7.654	9.216e-06
BICD2	-2.011	-1.008	7.005	-7.652	9.232e-06
CCSER1	2.336	1.224	4.118	7.647	9.3e-06
HSPA2	-2.145	-1.101	8.13	-7.64	9.406e-06
VNN1	2.323	1.216	6.865	7.639	9.419e-06
RPL3	-1.584	-0.6638	11.39	-7.616	9.815e-06
RUFY4	2.965	1.568	5.62	7.603	1.005e-05
TGFB2	-1.655	-0.7266	9.683	-7.6	1.009e-05
PTPRG	-2.586	-1.371	4.855	-7.591	1.023e-05
MOSPD3	-1.568	-0.6485	7.977	-7.592	1.023e-05
GPC1	-2.027	-1.019	6.615	-7.589	1.026e-05
RAB15	-2.592	-1.374	6.88	-7.588	1.026e-05
LPCAT2	-1.756	-0.8121	8.604	-7.587	1.026e-05
B3GNT7	1.308	0.3879	9.978	7.587	1.026e-05
SLC38A1	-1.447	-0.5327	8.683	-7.584	1.03e-05
ECH1	-1.262	-0.336	11.74	-7.57	1.052e-05
F2R	-1.829	-0.871	7.508	-7.572	1.052e-05
CHST11	1.498	0.5828	9.173	7.571	1.052e-05
TMEM9	-1.733	-0.7935	8.551	-7.567	1.056e-05
GPNMB	-2.365	-1.242	9.454	-7.56	1.07e-05
CIDEB	-1.509	-0.5936	9.058	-7.555	1.078e-05
ATP5F1	-1.531	-0.6149	9.521	-7.542	1.104e-05
ACAT1	-1.979	-0.9849	6.169	-7.54	1.107e-05
SMTNL1	1.855	0.8913	4.942	7.534	1.117e-05
ANOS1	-2.726	-1.447	6.728	-7.534	1.117e-05
PLAUR	4.893	2.291	6.975	7.508	1.172e-05
FER1L6	-1.488	-0.5731	9.34	-7.506	1.174e-05
CXCL6	2.258	1.175	8.771	7.501	1.184e-05
PECR	-1.606	-0.6837	8.075	-7.498	1.19e-05
SSBP2	-1.415	-0.5008	10.07	-7.484	1.22e-05
MAB21L2	2.322	1.215	5.065	7.476	1.234e-05
SLC26A2	-2.048	-1.034	7.633	-7.476	1.234e-05
ZNF710	1.783	0.8345	7.733	7.476	1.234e-05
VPS25	-1.382	-0.4673	8.936	-7.472	1.24e-05
DCLRE1C	1.625	0.7002	7.662	7.459	1.271e-05
CHAC1	2.681	1.423	8.388	7.456	1.274e-05
ADGRE5	1.493	0.578	9.991	7.457	1.274e-05
IL17C	3.205	1.68	6.148	7.448	1.292e-05
KIAA0040	1.742	0.801	8.226	7.447	1.292e-05
PRR5L	-2.23	-1.157	6.301	-7.446	1.294e-05
RPS13	-1.476	-0.5615	9.532	-7.445	1.295e-05
ALDH2	-1.794	-0.8431	8.009	-7.432	1.325e-05
C3AR1	3.618	1.855	3.796	7.423	1.346e-05
PRICKLE4	2.108	1.076	6.522	7.421	1.35e-05
CACNG4	-2.488	-1.315	7.163	-7.409	1.378e-05
KRT4	-2.672	-1.418	9.889	-7.405	1.387e-05
DNPH1	-1.336	-0.4181	9.981	-7.404	1.388e-05
KCNN3	1.958	0.9692	6.033	7.402	1.391e-05
ZNF618	2.711	1.439	6.193	7.398	1.398e-05
POU2F3	3.218	1.686	6.591	7.398	1.398e-05
MED13	1.33	0.4115	9.495	7.394	1.407e-05
HCAR3	2.063	1.045	6.496	7.39	1.417e-05
SRPX2	1.853	0.8901	8.837	7.38	1.439e-05
METTL4	1.682	0.7498	7.147	7.38	1.439e-05
MMP9	2.003	1.002	9.201	7.37	1.467e-05
SBNO2	1.553	0.6352	9.639	7.366	1.475e-05
PPP2R2A	1.495	0.58	9.202	7.36	1.49e-05
EVI2B	2.977	1.574	5.686	7.359	1.491e-05
REEP6	-1.688	-0.755	8.156	-7.356	1.497e-05
DLG2	2.475	1.307	4.404	7.355	1.499e-05
PLAGL1	1.812	0.8575	5.688	7.354	1.499e-05
UBQLNL	3.839	1.941	5.427	7.352	1.502e-05
ITGAE	-2.164	-1.113	5.608	-7.35	1.506e-05
RPL9	-1.422	-0.5079	10.07	-7.349	1.506e-05
DNER	-1.739	-0.7985	7.143	-7.344	1.519e-05
IDH1	-1.581	-0.6608	8.199	-7.341	1.527e-05
ENPP5	-1.547	-0.6298	10.2	-7.334	1.545e-05
CMTM4	-1.989	-0.9921	9.459	-7.333	1.547e-05
HDAC5	-1.801	-0.8489	7.604	-7.327	1.559e-05
SLC18B1	1.542	0.6248	9.041	7.328	1.559e-05
MYL9	-2.038	-1.027	9.409	-7.326	1.56e-05
CTSB	-1.276	-0.3514	11.67	-7.325	1.56e-05
TTC3	-1.695	-0.7611	9.219	-7.323	1.563e-05
HLA-DRA	1.415	0.5004	11.72	7.322	1.565e-05
DOPEY1	1.651	0.7237	7.816	7.315	1.584e-05
RBCK1	1.616	0.6927	7.31	7.311	1.594e-05
FAM117B	-1.768	-0.8218	8.088	-7.306	1.606e-05
GRAMD2B	1.704	0.7685	8.265	7.306	1.606e-05
SYNPO	-1.577	-0.6575	8.145	-7.292	1.647e-05
ACAA2	-1.826	-0.8687	6.836	-7.291	1.648e-05
MMAA	1.977	0.9836	7.714	7.279	1.687e-05
AGL	-1.848	-0.8858	7.099	-7.275	1.696e-05
STOML3	-1.491	-0.5767	11.02	-7.271	1.699e-05
ATP13A1	1.306	0.3854	9.691	7.272	1.699e-05
DEPTOR	-2.761	-1.465	6.411	-7.271	1.699e-05
MAP3K13	1.905	0.9294	9.443	7.273	1.699e-05
MAD2L1BP	1.629	0.7037	7.983	7.273	1.699e-05
NDST1	-1.637	-0.7113	7.562	-7.269	1.703e-05
CEBPD	1.889	0.9173	6.876	7.267	1.705e-05
SLC25A10	-1.649	-0.7214	8.183	-7.264	1.713e-05
TPGS2	-1.298	-0.3766	9.885	-7.257	1.735e-05
ELK4	1.295	0.3726	10.46	7.255	1.74e-05
RICTOR	1.467	0.5526	7.788	7.254	1.74e-05
G0S2	3.099	1.632	6.225	7.254	1.74e-05
IL22RA1	2.052	1.037	6.48	7.252	1.742e-05
FBXO39	2.334	1.223	5.241	7.247	1.758e-05
HLA-DRB6	2.083	1.059	10.22	7.245	1.762e-05
ATXN7	1.409	0.4951	8.507	7.24	1.777e-05
SRI	-1.575	-0.655	10.08	-7.233	1.801e-05
ADGRL3	-2.144	-1.1	4.688	-7.214	1.864e-05
SLC39A8	4.269	2.094	5.664	7.213	1.867e-05
ERLIN2	-1.416	-0.502	7.645	-7.208	1.88e-05
HEY1	-2.902	-1.537	7.393	-7.207	1.884e-05
PPP3CA	-1.475	-0.5604	8.657	-7.205	1.888e-05
VCAN	-2.843	-1.508	5.076	-7.198	1.91e-05
PSAT1	1.64	0.7134	8.505	7.197	1.914e-05
ADAM8	2.743	1.456	5.618	7.194	1.92e-05
APOD	1.657	0.7282	9.996	7.189	1.937e-05
ZNF267	1.682	0.7502	7.755	7.187	1.942e-05
SLC51A	2.203	1.14	7.218	7.186	1.943e-05
MAFF	2.19	1.131	7.205	7.183	1.951e-05
GMDS	1.567	0.6483	7.713	7.175	1.983e-05
BNIPL	-1.896	-0.9229	7.777	-7.173	1.985e-05
COLEC10	-1.9	-0.9261	4.552	-7.172	1.989e-05
LAPTM5	3.884	1.957	7.697	7.169	1.998e-05
C5orf56	2.642	1.402	6.119	7.16	2.028e-05
MGAM	2.236	1.161	6.684	7.159	2.032e-05
SH3BGRL	-1.293	-0.3711	9.66	-7.155	2.042e-05
TNS4	-1.452	-0.538	9.36	-7.155	2.042e-05
MXD1	2.638	1.399	8.977	7.152	2.053e-05
CHMP5	1.314	0.3937	9.926	7.149	2.062e-05
C4orf33	1.731	0.7916	7.044	7.139	2.097e-05
TMEM106C	-1.641	-0.7148	7.822	-7.135	2.112e-05
SCD5	-1.975	-0.9822	9.301	-7.13	2.131e-05
ADGRA3	-2.389	-1.257	6.565	-7.128	2.133e-05
ALDH3A1	-1.877	-0.9082	11.88	-7.129	2.133e-05
ABAT	2.073	1.052	6.487	7.12	2.165e-05
RPS17	-1.334	-0.4155	11.33	-7.115	2.182e-05
ARPC1A	-1.433	-0.5189	9.853	-7.107	2.216e-05
PANK1	-1.995	-0.9963	6.365	-7.106	2.218e-05
SERPINB11	-4.023	-2.008	6.053	-7.099	2.246e-05
PYGL	-1.424	-0.5102	8.568	-7.089	2.289e-05
SLC1A3	2.492	1.317	6.077	7.088	2.291e-05
ANTXR1	-1.665	-0.7354	9.355	-7.082	2.311e-05
TRERF1	-1.462	-0.5482	8.437	-7.079	2.323e-05
RPS4Y1	-1.51	-0.5942	7.817	-7.074	2.345e-05
UQCR11	-1.356	-0.4395	9.066	-7.073	2.346e-05
DSTN	-1.537	-0.6202	9.931	-7.061	2.392e-05
RIPK4	-1.48	-0.5657	8.996	-7.061	2.392e-05
RPL34	-1.317	-0.3968	11.17	-7.062	2.392e-05
PSMA2	1.443	0.5291	8.279	7.055	2.417e-05
RPL11	-1.347	-0.4293	10.73	-7.053	2.424e-05
LRTOMT	-1.476	-0.5616	10.33	-7.051	2.427e-05
RBP1	-1.862	-0.897	6.179	-7.051	2.427e-05
REXO2	-1.353	-0.4366	8.314	-7.05	2.429e-05
GDF15	2.346	1.23	8.928	7.048	2.437e-05
PLEK2	2.07	1.05	7.926	7.036	2.49e-05
ARPC1B	-1.474	-0.5598	8.918	-7.034	2.498e-05
MCTP2	1.521	0.6046	6.767	7.03	2.513e-05
BBOX1	-2.239	-1.163	6.096	-7.03	2.513e-05
HIST1H4E	-1.371	-0.4551	10.88	-7.026	2.527e-05
RPL18	-1.26	-0.3335	11.4	-7.013	2.591e-05
PHKB	-1.481	-0.5664	7.23	-7.003	2.637e-05
FAM111A	1.435	0.5207	8.827	7.004	2.637e-05
C2	1.997	0.9978	6.964	7.002	2.637e-05
HBEGF	3.888	1.959	6.269	7.001	2.639e-05
PDZD2	1.589	0.6682	6.823	6.998	2.653e-05
CASP7	1.3	0.378	9.325	6.995	2.665e-05
SLC9A3R1	-1.348	-0.4303	10.82	-6.995	2.665e-05
H1F0	2.09	1.064	8.664	6.986	2.707e-05
UBA6	2.027	1.02	7.18	6.982	2.727e-05
C15orf48	7.727	2.95	6.637	6.975	2.759e-05
PCBD1	-1.425	-0.5111	8.706	-6.968	2.796e-05
BAK1	2.012	1.009	8.439	6.965	2.81e-05
ANKIB1	1.373	0.4578	8.65	6.964	2.811e-05
LTA4H	-1.406	-0.4914	8.365	-6.959	2.831e-05
SHISA5	1.316	0.3957	11.44	6.96	2.831e-05
PPM1J	3.322	1.732	4.675	6.955	2.853e-05
OSMR	1.714	0.7777	7.682	6.954	2.853e-05
STEAP3	-1.626	-0.7011	10.63	-6.945	2.903e-05
GANC	1.688	0.7555	7.694	6.935	2.957e-05
LPIN2	1.601	0.6792	7.086	6.93	2.987e-05
SERINC5	-1.663	-0.7337	8.264	-6.911	3.097e-05
NBEA	1.417	0.503	9.211	6.908	3.11e-05
DOC2B	1.806	0.853	7.594	6.905	3.129e-05
ATP1A1	-1.368	-0.4517	10.58	-6.898	3.164e-05
HP1BP3	-1.433	-0.5191	7.795	-6.897	3.169e-05
COPA	-1.281	-0.3573	9.591	-6.895	3.176e-05
SLC25A5	-1.368	-0.4519	10.18	-6.87	3.34e-05
SLC5A5	-2.249	-1.169	6.483	-6.86	3.4e-05
CSTB	1.31	0.3895	11.53	6.858	3.409e-05
CFI	1.964	0.9737	7.718	6.858	3.409e-05
KMO	4.227	2.079	5.154	6.855	3.425e-05
MTHFD2	1.619	0.6954	8.031	6.843	3.504e-05
MCM2	1.633	0.7075	6.281	6.841	3.51e-05
BLVRA	-1.498	-0.5835	8.081	-6.84	3.517e-05
TMEM229B	1.847	0.8854	7.862	6.837	3.527e-05
OLFML2A	-1.728	-0.7888	6.698	-6.837	3.527e-05
NCK1	1.775	0.8279	8.723	6.837	3.527e-05
USP25	1.398	0.4836	8.071	6.836	3.53e-05
CRNDE	-1.567	-0.6482	10.12	-6.832	3.549e-05
SLC2A1	-1.306	-0.3847	10.73	-6.827	3.586e-05
KIAA1324	-2.95	-1.561	8.234	-6.821	3.621e-05
BRD2	1.305	0.3839	9.392	6.815	3.66e-05
ANAPC16	-1.278	-0.3539	9.456	-6.813	3.668e-05
LRP1	-2.155	-1.108	7.325	-6.813	3.668e-05
MTNR1A	2.722	1.445	6.255	6.811	3.675e-05
SLC47A2	-3.144	-1.653	7.059	-6.808	3.69e-05
ALDH7A1	-2.125	-1.087	6.516	-6.808	3.69e-05
ROBO1	-1.771	-0.8249	7.155	-6.805	3.71e-05
MCFD2	1.468	0.5543	8.393	6.802	3.726e-05
CEACAM5	1.828	0.8704	11.1	6.797	3.758e-05
BBC3	2.656	1.409	5.75	6.797	3.758e-05
PRPF8	-1.695	-0.761	9.328	-6.795	3.764e-05
NNT	-1.736	-0.7957	6.958	-6.785	3.837e-05
EEF2	-1.385	-0.4694	11.38	-6.783	3.847e-05
RND3	1.771	0.8246	9.389	6.783	3.847e-05
SIAE	-1.415	-0.5005	8.815	-6.782	3.849e-05
GDE1	-1.497	-0.5818	8.94	-6.775	3.902e-05
SPON2	-1.641	-0.7142	7.687	-6.771	3.919e-05
REEP5	-1.444	-0.5298	9.107	-6.771	3.919e-05
RAB3D	-1.624	-0.6993	7.844	-6.771	3.919e-05
DCK	1.774	0.8269	6.201	6.769	3.93e-05
SIRT2	-1.433	-0.5191	8.833	-6.767	3.938e-05
OAZ1	-1.251	-0.3232	10.58	-6.763	3.965e-05
PROM2	-1.613	-0.6895	7.19	-6.761	3.98e-05
ACY3	2.065	1.046	6.156	6.751	4.057e-05
MCL1	1.402	0.4875	10.83	6.743	4.117e-05
CASK	-1.456	-0.5425	8.277	-6.74	4.139e-05
CRYAB	-2.9	-1.536	6.355	-6.732	4.198e-05
TM7SF2	-1.53	-0.6136	9.516	-6.731	4.202e-05
TNFSF13	2.791	1.481	6.143	6.73	4.206e-05
EIF3H	-1.288	-0.3646	9.903	-6.728	4.218e-05
XPNPEP1	1.387	0.4721	9.765	6.727	4.219e-05
TNFAIP6	4.899	2.292	4.996	6.722	4.258e-05
HPGD	-1.908	-0.9321	6.142	-6.72	4.27e-05
IRAK4	1.561	0.6425	6.854	6.719	4.273e-05
SNX6	1.492	0.5769	9.169	6.719	4.273e-05
RAB26	-1.839	-0.8792	6.453	-6.714	4.308e-05
NDUFA9	1.457	0.5429	8.93	6.709	4.348e-05
PARP3	1.797	0.846	7.714	6.707	4.359e-05
PIK3R1	-1.758	-0.8139	7.461	-6.707	4.359e-05
TAGLN2	-1.397	-0.4824	10.64	-6.7	4.411e-05
TMEM63A	1.461	0.5468	8.919	6.698	4.424e-05
FKBP9	-1.441	-0.5268	9.856	-6.696	4.431e-05
PDP1	1.982	0.987	8.888	6.696	4.431e-05
PROX1	2.407	1.267	4.713	6.696	4.431e-05
C6	-1.937	-0.9538	8.767	-6.695	4.432e-05
CEP72	2.001	1	5.655	6.694	4.433e-05
CD74	1.315	0.395	12.16	6.694	4.433e-05
KPNA7	-1.566	-0.6469	7.528	-6.693	4.436e-05
IL1B	4.838	2.274	7.204	6.69	4.459e-05
PMEPA1	-1.514	-0.5988	8.328	-6.689	4.46e-05
DDB1	-1.339	-0.4214	9.788	-6.687	4.477e-05
C3orf38	1.557	0.6387	7.225	6.684	4.498e-05
TMEM173	1.329	0.4108	10.71	6.682	4.508e-05
SETX	1.643	0.7167	7.76	6.681	4.514e-05
CYP39A1	-1.768	-0.8221	5.576	-6.679	4.532e-05
DSP	-1.493	-0.5783	9.984	-6.675	4.555e-05
DYNC2H1	-2.331	-1.221	8.357	-6.675	4.555e-05
UQCRQ	-1.318	-0.3988	9.181	-6.673	4.565e-05
B3GNT2	1.488	0.573	8.973	6.671	4.581e-05
SP1	1.488	0.5738	9.902	6.667	4.613e-05
LOC100130691	-2.067	-1.048	4.122	-6.663	4.648e-05
EPHB6	-1.865	-0.8991	4.344	-6.662	4.648e-05
PAPLN	-2.17	-1.118	4.399	-6.662	4.648e-05
INTS12	1.513	0.597	8.417	6.66	4.654e-05
GOSR1	1.353	0.4364	10.23	6.655	4.702e-05
PTRHD1	-1.457	-0.5434	8.864	-6.652	4.723e-05
CD109	-1.699	-0.7643	6.176	-6.645	4.784e-05
PPM1L	-1.746	-0.8039	7.389	-6.638	4.847e-05
MAP6	-1.847	-0.8854	9.297	-6.627	4.953e-05
LIPA	1.471	0.557	8.884	6.623	4.983e-05
STYK1	1.619	0.695	6.527	6.623	4.983e-05
WDR54	-1.439	-0.525	8.885	-6.62	5.014e-05
CEACAM7	3.94	1.978	5.144	6.614	5.066e-05
SYCP2	2.074	1.052	4.805	6.613	5.071e-05
CAPNS1	-1.27	-0.3446	11.04	-6.608	5.114e-05
ASS1	1.583	0.6625	9.758	6.603	5.168e-05
MUC21	3.759	1.91	7.013	6.602	5.172e-05
KARS	1.312	0.3914	8.618	6.599	5.194e-05
GIPC2	-2.441	-1.287	5.696	-6.599	5.194e-05
KIAA1191	-1.362	-0.4463	8.68	-6.597	5.206e-05
RNF149	1.706	0.7708	7.099	6.595	5.211e-05
HTRA1	-2.028	-1.02	6.494	-6.596	5.211e-05
TMEM165	1.656	0.7279	8.819	6.592	5.239e-05
BTF3	-1.237	-0.3073	10.15	-6.587	5.29e-05
MGST1	-1.409	-0.4951	10.58	-6.585	5.31e-05
LRRC75A-AS1	-1.463	-0.5488	8.889	-6.58	5.346e-05
FMO5	-2.654	-1.408	5.544	-6.581	5.346e-05
NCF2	-1.277	-0.3531	8.76	-6.577	5.373e-05
SPTLC3	-1.547	-0.6297	7.023	-6.577	5.373e-05
PHF10	-1.407	-0.493	8.378	-6.574	5.393e-05
RCAN1	2.642	1.402	7.443	6.57	5.432e-05
ICK	1.418	0.5036	8.449	6.57	5.432e-05
RPL10A	-1.488	-0.5738	8.836	-6.566	5.463e-05
PIGX	-1.481	-0.5668	7.379	-6.566	5.463e-05
CEBPB	1.5	0.5845	7.586	6.562	5.488e-05
CTSH	-1.397	-0.4821	9.455	-6.563	5.488e-05
UBTF	-1.355	-0.4387	8.196	-6.562	5.488e-05
LAMB2	-1.804	-0.851	7.065	-6.555	5.563e-05
SLCO4A1	2.93	1.551	4.567	6.553	5.577e-05
C9orf84	2.577	1.366	3.753	6.55	5.603e-05
TNFSF15	2.539	1.344	4.564	6.55	5.603e-05
CDC42SE2	1.445	0.5313	8.784	6.547	5.626e-05
ZMAT3	-1.608	-0.6855	7.49	-6.547	5.626e-05
TAPBPL	1.684	0.7519	9.403	6.546	5.633e-05
VWA5A	1.396	0.4809	9.567	6.543	5.664e-05
FH	-1.39	-0.4751	7.613	-6.542	5.665e-05
FMO3	-2.271	-1.183	7.137	-6.539	5.688e-05
SAMM50	-1.341	-0.4238	8.92	-6.539	5.688e-05
CBLN3	2.335	1.223	6.235	6.537	5.703e-05
FICD	1.636	0.7105	7.035	6.531	5.773e-05
DENND2D	1.428	0.5137	7.993	6.53	5.778e-05
FETUB	-3.452	-1.787	4.452	-6.527	5.8e-05
CAT	-1.779	-0.8312	8.69	-6.527	5.8e-05
RAB40B	-1.719	-0.7819	6.671	-6.526	5.802e-05
ADH7	-2.069	-1.049	10.15	-6.526	5.802e-05
EPS8	1.773	0.8259	8.528	6.523	5.826e-05
RPLP2	-1.325	-0.4055	10.67	-6.522	5.832e-05
OST4	-1.356	-0.439	10.49	-6.517	5.882e-05
MCUB	2.059	1.042	7.223	6.517	5.885e-05
STOM	1.418	0.5041	10.13	6.515	5.9e-05
RPS3	-1.449	-0.5355	10.04	-6.512	5.927e-05
SGPL1	-1.455	-0.5408	8.373	-6.51	5.947e-05
FLRT3	-1.478	-0.5634	7.237	-6.508	5.965e-05
ZNF385A	-1.607	-0.6848	7.657	-6.5	6.058e-05
MIF4GD	-1.688	-0.7552	6.516	-6.496	6.099e-05
TMEM219	1.567	0.6484	6.702	6.491	6.16e-05
CDON	-2.79	-1.48	5.574	-6.488	6.193e-05
KRT40	2.012	1.009	5.425	6.486	6.215e-05
MUC5B	1.858	0.8939	6.72	6.483	6.247e-05
LRRC26	-2.01	-1.007	7.569	-6.479	6.286e-05
CXCL5	7.196	2.847	6.942	6.478	6.29e-05
CPNE8	1.665	0.7354	9.14	6.476	6.306e-05
DPY30	-1.255	-0.3273	10.6	-6.476	6.306e-05
STK17A	-1.346	-0.4282	8.319	-6.475	6.312e-05
CGNL1	2.266	1.18	4.926	6.474	6.317e-05
TLR4	1.857	0.893	7.545	6.474	6.319e-05
LAMP1	-1.376	-0.4605	9.022	-6.471	6.347e-05
AK1	-1.473	-0.5589	8.292	-6.469	6.353e-05
NRG2	2.044	1.032	6.675	6.469	6.353e-05
RPS20	-1.287	-0.3643	10.84	-6.467	6.382e-05
RNF31	1.542	0.6244	7.121	6.464	6.407e-05
ASPH	1.281	0.3574	10.39	6.462	6.425e-05
SLC30A7	1.367	0.4513	8.054	6.46	6.457e-05
KRT14	-1.971	-0.9792	10.83	-6.458	6.475e-05
SERINC2	-1.285	-0.3618	10.13	-6.457	6.481e-05
MYO5A	-1.637	-0.7109	6.718	-6.455	6.503e-05
RPS6KC1	1.585	0.6644	6.622	6.453	6.505e-05
EIF3K	-1.273	-0.3477	10.52	-6.453	6.505e-05
BMP2	2.238	1.162	5.859	6.453	6.505e-05
VEGFA	1.775	0.8277	7.992	6.452	6.511e-05
PLEKHA2	1.674	0.7433	7.349	6.447	6.575e-05
PEX14	1.41	0.4962	7.568	6.445	6.593e-05
FAM135A	1.916	0.938	6.888	6.437	6.689e-05
HMG20B	-1.323	-0.4043	8.802	-6.436	6.701e-05
CD164L2	-1.527	-0.611	9.291	-6.428	6.806e-05
CHD3	-1.673	-0.7427	7.811	-6.427	6.816e-05
ITGB4	-1.586	-0.6653	8.872	-6.426	6.824e-05
HAGHL	-1.575	-0.6549	6.866	-6.425	6.835e-05
TRIB1	2.12	1.084	9.14	6.422	6.87e-05
SH2D1B	6.683	2.741	5.887	6.418	6.902e-05
ITPRIPL1	-2.2	-1.138	5.56	-6.419	6.902e-05
SLC6A14	2.062	1.044	9.821	6.417	6.912e-05
OGT	-1.359	-0.4429	8.359	-6.416	6.921e-05
MT1M	2.07	1.049	6.746	6.412	6.968e-05
ABCD3	-1.383	-0.4677	9.498	-6.41	6.989e-05
TMEM92	2.724	1.446	6.056	6.409	7.007e-05
RASGEF1B	1.628	0.7032	8.171	6.392	7.241e-05
CALD1	-1.929	-0.9479	7.577	-6.392	7.241e-05
DSG3	-2.021	-1.015	8.381	-6.391	7.247e-05
CARD17	4.143	2.051	5.239	6.39	7.251e-05
TALDO1	-1.281	-0.357	8.853	-6.39	7.251e-05
HADH	-1.492	-0.5773	8.387	-6.388	7.264e-05
HSPA4L	-1.711	-0.7745	8.364	-6.387	7.271e-05
EREG	3.435	1.78	4.835	6.386	7.281e-05
TECR	-1.3	-0.3781	10.47	-6.378	7.407e-05
THOC7	-1.377	-0.4613	8.546	-6.376	7.418e-05
USF1	1.658	0.7291	7.664	6.367	7.552e-05
SLC28A3	1.486	0.5719	7.331	6.364	7.6e-05
IRF2	1.381	0.4654	8.629	6.357	7.697e-05
SERPINA3	3.068	1.617	8.743	6.351	7.789e-05
GPR180	1.706	0.7709	6.468	6.35	7.792e-05
HDLBP	-1.277	-0.3523	11.31	-6.347	7.833e-05
CLIC4	1.63	0.7048	9.143	6.344	7.886e-05
VNN2	2.034	1.024	6.775	6.341	7.922e-05
TBX1	1.455	0.5406	6.998	6.338	7.972e-05
MUC20	1.393	0.4777	10.69	6.334	8.01e-05
RPS4X	-1.401	-0.486	11.77	-6.335	8.01e-05
SH2D4A	1.407	0.4925	8.371	6.334	8.01e-05
SPTLC2	1.314	0.3943	9.288	6.332	8.026e-05
NXPE3	-1.92	-0.9407	4.669	-6.329	8.081e-05
RHOC	-1.317	-0.3974	8.97	-6.321	8.198e-05
POLR2I	-1.411	-0.4972	9.333	-6.319	8.221e-05
BCAP29	1.992	0.9943	7.609	6.318	8.235e-05
TLL1	-2.092	-1.065	5.699	-6.318	8.235e-05
CALR	1.185	0.2446	11.76	6.317	8.242e-05
APP	-1.273	-0.3482	10.24	-6.315	8.27e-05
RACK1	-1.264	-0.338	11.6	-6.314	8.271e-05
SGF29	1.433	0.5194	8.093	6.314	8.271e-05
PRDX1	-1.308	-0.3873	10.77	-6.305	8.408e-05
ANTXR2	2.083	1.059	7.047	6.303	8.448e-05
APOBEC3B	4.595	2.2	6.154	6.3	8.486e-05
KPNB1	1.342	0.424	9.126	6.294	8.587e-05
SCARB2	1.767	0.8211	7.64	6.291	8.623e-05
GATS	-1.411	-0.4965	9.91	-6.29	8.632e-05
ERAP1	1.346	0.4291	8.821	6.29	8.632e-05
AKR1B10	-2.507	-1.326	6.735	-6.29	8.632e-05
FUT6	1.656	0.7281	8.667	6.288	8.635e-05
TMPRSS4	1.438	0.5244	9.419	6.289	8.635e-05
CYB5R3	-1.285	-0.362	10.27	-6.286	8.675e-05
MRPL17	1.368	0.4524	9.001	6.283	8.712e-05
CBX5	-1.505	-0.5901	8.335	-6.281	8.74e-05
NINJ2	-1.442	-0.5284	8.03	-6.279	8.765e-05
CYYR1	-1.758	-0.8138	5.885	-6.279	8.771e-05
AGRN	1.525	0.6086	8.068	6.277	8.786e-05
MMP1	-2.344	-1.229	5.403	-6.275	8.805e-05
AHNAK	-2.021	-1.015	7.56	-6.276	8.805e-05
FUT3	1.481	0.5669	7.657	6.275	8.811e-05
RNF130	-1.567	-0.6481	9.073	-6.272	8.852e-05
C11orf88	-1.586	-0.6657	9.171	-6.271	8.855e-05
TPK1	1.993	0.9947	4.983	6.27	8.877e-05
MRPS31	-1.685	-0.7525	6.649	-6.267	8.912e-05
BATF	2.044	1.032	6.208	6.265	8.948e-05
FILIP1L	-2.103	-1.072	7.005	-6.261	9.016e-05
CASP8	1.803	0.8503	8.289	6.256	9.103e-05
MIA3	1.316	0.3959	8.55	6.248	9.236e-05
SERPINB10	2.553	1.352	7.128	6.246	9.282e-05
ZNF703	-1.825	-0.868	7.034	-6.238	9.42e-05
NDRG3	-1.399	-0.4845	8.821	-6.237	9.438e-05
CUX1	-1.318	-0.3981	9.578	-6.233	9.509e-05
GPR161	-1.974	-0.9811	5.167	-6.23	9.547e-05
SUMF1	-1.497	-0.5823	6.427	-6.229	9.55e-05
MET	1.543	0.6261	9.367	6.23	9.55e-05
TBC1D14	-1.341	-0.4229	8.792	-6.229	9.55e-05
FTO	-1.457	-0.5426	9.724	-6.222	9.684e-05
CD55	1.284	0.361	11.06	6.221	9.692e-05
ETS2	1.269	0.3439	9.499	6.219	9.732e-05
CROT	-1.661	-0.7316	7.256	-6.216	9.767e-05
TAAR3P	2.191	1.131	3.32	6.214	9.812e-05
SNX8	1.718	0.7808	6.535	6.212	9.834e-05
TMEM107	-1.567	-0.6482	8.467	-6.209	9.894e-05
HM13	1.568	0.649	9.46	6.208	9.908e-05
IFNB1	1.759	0.8149	2.752	6.207	9.919e-05
ATP5G2	-1.348	-0.431	10.33	-6.201	0.0001002
PRDX3	-1.259	-0.3318	9.589	-6.198	0.0001009
SRGAP1	1.544	0.627	7.858	6.194	0.0001015
MAP1B	-2.159	-1.111	8.376	-6.19	0.0001025
HACD2	-1.432	-0.5183	9.858	-6.189	0.0001026
AKAP14	-1.604	-0.6813	10.26	-6.185	0.0001032
ZCCHC2	1.651	0.7236	7.171	6.18	0.0001042
HSPA1A	-1.449	-0.5349	9.804	-6.178	0.0001047
TOMM34	-1.294	-0.372	9.774	-6.171	0.0001061
SMG7	1.361	0.4447	9.618	6.169	0.0001065
SOX21	-1.785	-0.8359	6.41	-6.167	0.0001069
FAM83A	1.99	0.9928	9.407	6.16	0.0001082
UHRF1BP1	1.56	0.6419	6.456	6.159	0.0001084
E2F5	1.844	0.8827	7.259	6.156	0.0001087
PLAT	2.875	1.524	6.456	6.156	0.0001087
GAS6-AS1	-2.667	-1.415	5.86	-6.157	0.0001087
TMBIM6	-1.208	-0.2725	12.13	-6.156	0.0001087
PROSER2	1.63	0.7047	6.759	6.154	0.000109
SERPINF1	-1.451	-0.5369	8.53	-6.153	0.0001092
CHCHD10	-1.454	-0.5395	7.746	-6.147	0.0001104
PPP2R3A	-1.6	-0.6779	5.938	-6.145	0.0001107
TCTA	-1.33	-0.4118	8.743	-6.145	0.0001107
PELI1	1.588	0.6675	7.881	6.144	0.0001109
SLC5A1	2.297	1.2	5.177	6.141	0.0001116
ACSF2	-1.61	-0.6868	7.474	-6.137	0.0001123
IL1RN	2.425	1.278	9.676	6.131	0.0001135
ATP6V1B1	-2.265	-1.18	6.291	-6.127	0.0001145
ACAP3	-1.522	-0.606	6.731	-6.122	0.0001155
FAM183A	-1.428	-0.5142	9.922	-6.117	0.0001165
SPTAN1	-1.477	-0.5625	9.239	-6.118	0.0001165
IL3RA	1.912	0.9354	5.01	6.112	0.0001177
ENO1	-1.362	-0.4458	11	-6.109	0.0001184
GNA14	1.416	0.5023	8.43	6.097	0.0001213
STAU2	-1.337	-0.4193	8.69	-6.096	0.0001216
YWHAQ	-1.215	-0.2811	10.91	-6.094	0.0001218
PLP2	-1.272	-0.3472	10.86	-6.092	0.0001222
PDLIM4	-1.434	-0.5203	6.713	-6.092	0.0001222
FAM83D	-1.739	-0.798	7.27	-6.091	0.0001223
PRKX	-1.577	-0.6573	7.8	-6.09	0.0001224
SORT1	-1.464	-0.5498	9.277	-6.086	0.0001234
ZNF608	-1.473	-0.5589	8.431	-6.085	0.0001235
TCIRG1	1.349	0.4317	9.619	6.082	0.000124
TRIM56	1.527	0.6103	7.55	6.083	0.000124
MSMB	-1.491	-0.5767	10.66	-6.081	0.0001243
COMT	-1.303	-0.3816	9.139	-6.079	0.0001247
ADI1	-1.369	-0.4535	7.914	-6.076	0.0001253
CYP2B6	-1.58	-0.6603	8.259	-6.068	0.0001269
FTL	-1.495	-0.5804	10.39	-6.069	0.0001269
RCN2	-1.43	-0.5162	8.343	-6.07	0.0001269
SLC24A1	1.871	0.9038	6.614	6.069	0.0001269
LOC101929895	2.985	1.578	5.916	6.067	0.000127
ATP5J	-1.226	-0.2934	11.07	-6.067	0.000127
SPART	1.26	0.3336	9.513	6.059	0.0001292
CYP24A1	3.2	1.678	8.029	6.057	0.0001295
NRARP	-1.63	-0.7049	5.494	-6.057	0.0001295
BAZ1A	1.403	0.4883	8.087	6.052	0.0001307
UNC5B	-1.837	-0.8774	7.741	-6.05	0.0001311
NDUFS5	-1.364	-0.4477	9.718	-6.049	0.0001313
UBR3	-1.591	-0.6698	7.836	-6.043	0.000133
GNAI2	-1.286	-0.3627	9.329	-6.042	0.000133
S100A2	-1.592	-0.6707	10.35	-6.041	0.0001331
S100A4	-2.149	-1.104	8.444	-6.037	0.0001343
BPIFB1	-1.215	-0.2815	12.73	-6.036	0.0001344
ZMYND10	-1.214	-0.2797	11.91	-6.035	0.0001347
TCIM	2.06	1.042	6.281	6.032	0.0001354
ANKRD13A	1.438	0.5241	8.765	6.031	0.0001354
2002-09-01	-1.255	-0.3274	8.309	-6.027	0.0001364
CDC42EP2	2.092	1.065	6.878	6.024	0.0001373
KCNMA1	-2.637	-1.399	4.498	-6.023	0.0001373
TRAK2	-1.54	-0.6234	7.672	-6.023	0.0001374
CAPN9	-3.227	-1.69	6.329	-6.018	0.0001385
LY6E-DT	1.781	0.833	4.59	6.015	0.0001395
MIER1	1.523	0.6065	7.472	6.009	0.0001409
TMSB10	1.307	0.386	11.4	6.009	0.0001409
ANXA8	-1.632	-0.7064	7.666	-6.006	0.0001418
PKP1	-1.927	-0.9466	7.503	-6.005	0.0001419
LARS	-1.483	-0.5687	7.911	-6.004	0.000142
RPL30	-1.303	-0.3818	10.22	-6.003	0.0001421
STK10	1.486	0.5716	7.189	5.998	0.0001437
RMI1	1.499	0.584	7.295	5.998	0.0001437
CYP2F1	-1.976	-0.9825	9.992	-5.993	0.000145
MTMR11	1.671	0.741	6.637	5.988	0.0001461
TICAM1	1.817	0.8619	5.918	5.988	0.0001461
HIST2H2BE	1.659	0.7302	9.139	5.988	0.0001461
COLCA1	-3.07	-1.618	6.725	-5.982	0.0001478
HSP90B1	1.218	0.284	11.06	5.981	0.0001479
HADHA	-1.309	-0.388	9.092	-5.98	0.0001482
HYOU1	1.298	0.3764	8.616	5.977	0.0001491
OR56B1	2.637	1.399	5.131	5.974	0.0001497
CD177	2.381	1.251	6.464	5.974	0.0001497
IFNL2	2.585	1.37	5.748	5.971	0.0001506
OGFRL1	-1.85	-0.8874	7.344	-5.97	0.0001508
TMEM139	1.775	0.8278	7.875	5.968	0.0001512
POLD2	-1.342	-0.424	9.49	-5.967	0.0001512
ROGDI	-1.333	-0.4149	9.191	-5.968	0.0001512
CDKL1	-1.756	-0.8121	8.754	-5.964	0.0001521
CAPS	-1.345	-0.4272	11.14	-5.963	0.0001525
SLC25A30	2.065	1.046	5.807	5.96	0.0001534
GRAMD1A	-1.57	-0.651	7.145	-5.954	0.000155
ACPP	-1.836	-0.8767	5.736	-5.951	0.0001559
MKL2	-1.411	-0.4965	8.55	-5.949	0.0001564
PLVAP	2.268	1.181	3.145	5.946	0.0001575
ASRGL1	-1.654	-0.7257	6.944	-5.944	0.000158
SETD9	-1.629	-0.7037	6.588	-5.942	0.0001584
RNF152	-1.672	-0.7416	7.621	-5.941	0.0001585
BACH1	1.61	0.6873	7.489	5.94	0.0001589
OAT	-1.294	-0.372	9.083	-5.937	0.0001596
ETV6	1.243	0.3134	10.17	5.936	0.00016
ANAPC15	-1.624	-0.7	7.381	-5.935	0.0001603
VILL	-1.42	-0.5054	7.73	-5.934	0.0001603
MAPK8IP1	-1.608	-0.6854	7.722	-5.934	0.0001603
FAM8A1	1.335	0.4168	7.897	5.933	0.0001604
NDUFA4	-1.257	-0.3304	11.27	-5.93	0.0001611
STAP2	1.295	0.3729	8.289	5.93	0.0001611
PNPLA4	-1.796	-0.8445	6.845	-5.931	0.0001611
ADM	3.254	1.702	7.726	5.928	0.0001616
USP15	1.623	0.6982	8.701	5.923	0.0001631
KLK12	-1.963	-0.9729	7.74	-5.92	0.0001639
C16orf52	1.426	0.5122	7.587	5.918	0.0001645
PTP4A1	1.309	0.3887	10.73	5.916	0.0001654
TRAPPC1	-1.291	-0.368	10.13	-5.914	0.000166
BEX3	-1.602	-0.6801	6.597	-5.911	0.0001669
RPS18	-1.363	-0.4466	11.06	-5.909	0.0001672
DAPK1	-1.451	-0.5366	7.547	-5.908	0.0001675
ADGRF1	1.314	0.3938	10.07	5.907	0.0001676
NFIB	-1.419	-0.5053	9.958	-5.907	0.0001676
CABYR	-1.538	-0.6209	5.952	-5.905	0.000168
SCNN1B	-1.642	-0.7155	6.846	-5.9	0.0001696
SCP2	-1.359	-0.4426	10.24	-5.901	0.0001696
PHLPP2	1.957	0.9686	5.88	5.897	0.0001707
AK7	-1.267	-0.3418	10.31	-5.895	0.0001714
KLK10	1.973	0.9806	9.992	5.894	0.0001714
RTL8A	-1.433	-0.5193	7.345	-5.893	0.0001716
SERTAD1	1.669	0.739	7.202	5.892	0.0001718
C9orf24	-1.32	-0.4004	11.38	-5.891	0.0001723
FGFBP1	1.751	0.8079	8.544	5.89	0.0001725
ENPP3	-1.47	-0.556	7.876	-5.887	0.0001732
RPS5	-1.409	-0.4946	9.661	-5.881	0.0001753
CDH11	-1.593	-0.6719	6.276	-5.88	0.0001757
ANKRD35	-1.769	-0.823	6.412	-5.88	0.0001757
TMCC2	-3.005	-1.588	5.855	-5.878	0.0001762
FAM104B	-1.283	-0.3595	9.374	-5.877	0.0001764
CCNDBP1	-1.255	-0.3278	9.091	-5.876	0.0001765
OR2B6	2.053	1.038	4.23	5.875	0.0001769
STXBP1	-1.322	-0.4032	9.006	-5.872	0.0001777
RHOU	1.356	0.4396	8.543	5.87	0.0001784
NOS3	2.507	1.326	4.721	5.868	0.000179
SPARC	-2.2	-1.138	6.993	-5.867	0.0001794
GCLC	-1.381	-0.4654	9.45	-5.866	0.0001796
RIPK2	1.718	0.7805	7.485	5.865	0.0001799
SRFBP1	1.345	0.428	8.284	5.86	0.0001813
SYAP1	-1.362	-0.4461	8.769	-5.859	0.0001817
EMP2	-1.251	-0.3234	10.58	-5.857	0.0001823
IRS1	1.543	0.6255	6.634	5.856	0.0001828
ZDHHC2	-1.543	-0.626	7.019	-5.855	0.0001828
RANGAP1	1.607	0.6839	7.668	5.852	0.000184
FZD1	-1.598	-0.6767	8.176	-5.851	0.0001841
PRSS22	1.637	0.7112	9.718	5.851	0.0001842
FGFR3	-1.785	-0.836	6.254	-5.843	0.000187
PLCH1	1.287	0.3638	9.19	5.842	0.0001872
BIK	1.364	0.4483	7.592	5.842	0.0001872
TSTD1	-1.433	-0.5192	9.027	-5.84	0.0001879
KAT2B	1.458	0.5439	7.692	5.837	0.0001889
CCDC78	-1.569	-0.6503	8.975	-5.834	0.0001898
CPE	-1.877	-0.9084	6.327	-5.834	0.0001899
RCN1	1.478	0.564	8.446	5.833	0.00019
FAXC	-1.86	-0.8954	4.844	-5.83	0.0001912
NECTIN1	-1.521	-0.6048	8.035	-5.829	0.0001915
PPA1	1.525	0.6093	7.181	5.827	0.0001922
BAMBI	-1.491	-0.5764	6.936	-5.826	0.0001923
PIGV	1.507	0.5914	7.347	5.825	0.0001927
EIF2AK1	-1.307	-0.3862	9.744	-5.824	0.0001929
MFSD12	1.421	0.5069	7.843	5.822	0.0001934
SAT1	1.218	0.2843	11.61	5.822	0.0001934
UBE4B	-1.49	-0.5751	8.252	-5.82	0.0001938
RASGRF1	2.065	1.046	5.287	5.819	0.000194
ATXN2	-1.25	-0.322	10.75	-5.819	0.000194
PTN	1.634	0.7083	5.575	5.818	0.0001944
SLC26A9	1.966	0.9753	5.485	5.814	0.0001959
AGR2	1.38	0.4651	9.043	5.81	0.0001975
TMEM59	-1.211	-0.2765	10.87	-5.803	0.0002003
NDUFA11	-1.256	-0.3291	9.582	-5.801	0.0002007
ATP5J2	-1.335	-0.4168	11.02	-5.8	0.0002012
PRKAR2A	-1.596	-0.6749	6.463	-5.795	0.0002031
DHRS11	-1.396	-0.4816	6.887	-5.795	0.0002031
UBE2Z	1.442	0.5279	9.379	5.794	0.0002033
LDLRAD1	-1.315	-0.3946	11.43	-5.792	0.0002039
THBS1	1.842	0.8812	9.163	5.791	0.0002042
MT1A	1.303	0.3821	10.51	5.789	0.0002052
LDLRAP1	-1.338	-0.4201	8.392	-5.785	0.0002065
NACA	-1.335	-0.417	10.2	-5.783	0.0002074
RRAGC	1.597	0.6757	8.028	5.782	0.0002075
LOC101927057	1.534	0.6176	8.046	5.781	0.0002078
PRPF3	1.299	0.3779	8.593	5.78	0.0002081
DRAP1	1.45	0.5358	7.765	5.775	0.0002102
STUB1	-1.313	-0.3925	8.641	-5.771	0.0002119
GADD45A	1.668	0.7379	9.044	5.766	0.0002141
RPL35	-1.292	-0.3697	10.54	-5.765	0.0002144
DBI	-1.467	-0.5533	8.845	-5.765	0.0002144
MPV17	-1.269	-0.3434	8.933	-5.764	0.0002144
ZKSCAN1	-1.417	-0.5028	9.836	-5.764	0.0002144
CSRNP1	2.448	1.291	6.542	5.759	0.0002166
DTNA	-1.752	-0.8087	7.026	-5.757	0.0002171
MTSS1	-1.449	-0.5346	9.117	-5.757	0.0002171
SLC43A2	1.288	0.365	10.28	5.756	0.0002174
CIB1	-1.333	-0.4142	9.386	-5.755	0.0002177
PTPRF	-1.8	-0.8482	9.056	-5.752	0.0002188
GLB1L2	-1.414	-0.4995	8.934	-5.748	0.0002208
RPL6	-1.584	-0.6636	9.185	-5.744	0.0002226
ADAP1	1.49	0.5749	7.64	5.743	0.0002229
HSPA5	1.206	0.2707	10.77	5.74	0.000224
MOCOS	1.386	0.4713	8.425	5.739	0.0002245
ESYT1	-1.444	-0.5305	8.276	-5.737	0.0002249
EGFL6	-1.929	-0.9481	5.628	-5.737	0.0002249
COPZ2	-1.796	-0.8447	4.72	-5.737	0.0002249
STARD10	-1.313	-0.3924	9.884	-5.735	0.0002253
DENND3	1.802	0.8496	6.317	5.734	0.0002258
TNFAIP8	1.578	0.658	7.606	5.728	0.0002286
TBCB	-1.3	-0.3787	8.638	-5.724	0.0002304
OTUD4	1.363	0.4466	9.154	5.723	0.0002306
DUSP16	1.371	0.4557	7.17	5.721	0.0002317
AKR1B1	-1.631	-0.7057	8.024	-5.719	0.0002322
C3	1.27	0.3449	12.15	5.717	0.0002331
SYNPO2	1.996	0.9972	4.492	5.716	0.0002335
CMBL	-1.558	-0.6401	6.411	-5.711	0.0002357
GPR143	1.994	0.996	5.707	5.711	0.0002358
FUS	1.227	0.2954	9.369	5.709	0.0002366
GXYLT2	-1.932	-0.9498	7.655	-5.707	0.0002374
PTTG1	-1.773	-0.8258	5.826	-5.705	0.0002381
CA5B	-1.321	-0.4015	8.721	-5.701	0.0002404
BARX2	1.691	0.7583	5.543	5.699	0.0002408
DTX2	1.392	0.4768	8.556	5.693	0.0002441
DEGS1	1.643	0.7161	6.795	5.692	0.0002445
VAV3	-1.855	-0.8914	5.949	-5.69	0.0002448
COLCA2	-1.895	-0.9218	7.914	-5.69	0.0002448
CXCL9	2.369	1.244	4.418	5.69	0.0002448
RPL8	-1.275	-0.3503	11.95	-5.69	0.0002448
CCNI	-1.284	-0.3611	11.01	-5.686	0.0002463
GLS	-2.165	-1.114	6.259	-5.686	0.0002463
SLC25A35	-1.631	-0.7057	6.818	-5.686	0.0002463
GSR	-1.389	-0.4736	9.185	-5.684	0.0002471
PAFAH1B3	-1.354	-0.4373	8.134	-5.684	0.0002471
TMEM51	1.755	0.8114	6.831	5.681	0.0002485
DCLK1	-1.985	-0.9892	4.087	-5.679	0.0002494
DLGAP5	-2.174	-1.12	4.197	-5.678	0.0002494
ELL2	-1.305	-0.3837	9.656	-5.674	0.0002517
NRP2	1.525	0.6091	7.463	5.673	0.0002517
PARP11	1.409	0.495	6.905	5.669	0.0002536
CLCN3	-1.318	-0.3984	9.533	-5.667	0.0002543
RSU1	-1.228	-0.2959	10.27	-5.668	0.0002543
TANGO6	2.268	1.182	5.361	5.667	0.0002543
FNDC3B	1.284	0.3603	10.65	5.663	0.0002561
MXRA5	-1.748	-0.8054	5.047	-5.662	0.0002566
C2orf76	-1.985	-0.9894	7.257	-5.661	0.0002567
TTC38	1.558	0.64	6.94	5.661	0.0002567
CCRL2	2.15	1.104	4.876	5.662	0.0002567
MAGED2	-1.375	-0.4594	9.517	-5.658	0.0002579
CBR4	-1.398	-0.4839	7.518	-5.659	0.0002579
MCM8	-1.424	-0.5096	7.905	-5.657	0.0002586
CLEC7A	1.918	0.9399	8.512	5.651	0.0002615
ADAM17	1.525	0.609	7.491	5.651	0.0002615
ERO1A	1.559	0.6408	9.395	5.65	0.0002616
SLC8B1	1.531	0.6147	8.307	5.649	0.0002621
BMP4	-1.256	-0.3287	8.932	-5.647	0.0002629
ATP13A2	-1.43	-0.5156	7.372	-5.643	0.0002649
NOP53	-1.428	-0.514	7.441	-5.643	0.0002649
PLEKHA1	-1.318	-0.3986	8.551	-5.641	0.0002657
DKK1	3.015	1.592	4.994	5.639	0.0002668
CEACAM6	1.633	0.7076	10.37	5.639	0.0002668
HAPLN3	2.04	1.028	6.018	5.638	0.0002671
TMEM134	-1.405	-0.4904	7.48	-5.637	0.0002671
NTN1	-1.33	-0.4113	8.352	-5.638	0.0002671
AKR1C1	-1.546	-0.6283	10.64	-5.635	0.0002676
PHPT1	-1.357	-0.4404	9.381	-5.635	0.0002676
PKM	-1.316	-0.3957	10.95	-5.635	0.0002676
CHP1	-1.283	-0.3592	10.69	-5.633	0.0002683
FGF2	2.145	1.101	4.293	5.633	0.0002683
YBX2	-1.755	-0.8118	5.571	-5.63	0.0002702
TOP2B	-1.48	-0.5654	8.092	-5.624	0.0002735
TPRG1L	-1.256	-0.329	9.155	-5.623	0.0002738
HSPA1B	-1.282	-0.3586	10.63	-5.622	0.0002741
CRCP	-1.233	-0.3016	8.987	-5.62	0.0002754
ECT2L	-1.7	-0.7652	8.491	-5.615	0.0002779
PGRMC1	-1.283	-0.3592	9.816	-5.611	0.0002803
ANXA5	-1.263	-0.3368	10.18	-5.609	0.0002811
ERGIC3	-1.223	-0.2908	10.16	-5.609	0.0002811
PIGG	1.412	0.4974	7.568	5.606	0.0002825
NAT6	-1.562	-0.643	7.002	-5.605	0.0002832
LY6G5C	-1.42	-0.5058	8.018	-5.604	0.0002832
OR1M1	2.558	1.355	6.059	5.599	0.0002861
KLHDC2	-1.368	-0.4521	7.546	-5.598	0.0002869
RBM43	1.638	0.7122	6.291	5.594	0.0002891
ILDR1	1.289	0.3664	7.492	5.59	0.0002913
UCP2	-1.352	-0.4351	10.59	-5.59	0.0002913
PPIP5K2	-1.338	-0.4199	8.118	-5.589	0.0002914
ACKR3	-2.113	-1.079	7.444	-5.589	0.0002914
RIPK3	1.661	0.7321	6.578	5.586	0.0002933
ELMOD2	-1.296	-0.3739	8.541	-5.585	0.0002938
MINDY2	1.614	0.6906	6.529	5.584	0.0002938
CKAP4	1.415	0.5005	8.679	5.58	0.0002965
MSI2	-1.455	-0.5414	8.792	-5.577	0.0002978
PDGFRL	1.995	0.9962	4.604	5.576	0.0002985
BCL7B	1.306	0.385	7.735	5.575	0.000299
ABTB1	-1.781	-0.833	6.024	-5.572	0.0003009
SCCPDH	-1.382	-0.4673	8.194	-5.57	0.0003019
CNDP2	1.216	0.2824	11.2	5.569	0.000302
MAP4	-1.325	-0.4061	9.262	-5.565	0.0003045
PEBP1	-1.463	-0.549	8.258	-5.563	0.000306
SERPINB9	2.096	1.068	6.629	5.561	0.0003068
HES4	1.54	0.6226	6.78	5.556	0.0003102
SMDT1	-1.334	-0.4157	8.465	-5.553	0.0003116
ALCAM	-1.308	-0.3869	11.1	-5.551	0.0003131
CLDN23	1.888	0.9165	6.409	5.549	0.0003142
ARL5B	1.676	0.7452	8.004	5.547	0.0003151
METTL5	-1.334	-0.4154	8.741	-5.545	0.0003166
SPIN1	-1.249	-0.3204	8.35	-5.541	0.0003184
NIPAL2	-1.301	-0.3797	8.304	-5.542	0.0003184
IL6ST	1.383	0.4681	8.096	5.54	0.0003193
PITPNB	1.356	0.4394	9.009	5.534	0.0003231
TMEM117	-1.586	-0.6655	6.404	-5.534	0.0003231
RELL1	1.314	0.3943	8.724	5.528	0.0003271
SLC38A4	2.33	1.22	4.924	5.525	0.0003286
RNF145	1.52	0.6045	8.957	5.517	0.0003341
XRCC5	-1.216	-0.2821	8.86	-5.517	0.0003341
CAB39L	-1.351	-0.4338	7.584	-5.516	0.0003345
ADH1C	-2.116	-1.081	7.585	-5.515	0.0003348
NQO1	-1.267	-0.3418	10.42	-5.512	0.0003374
FXYD5	2.484	1.313	7.975	5.511	0.0003377
COX6C	-1.265	-0.3396	9.456	-5.51	0.0003381
CDC20B	-1.831	-0.8729	7.84	-5.509	0.0003382
MR1	1.51	0.595	8.507	5.51	0.0003382
TEX26	-1.341	-0.423	9.303	-5.504	0.000342
BLOC1S3	1.536	0.619	7.216	5.501	0.0003436
NUTF2	-1.358	-0.4419	9.673	-5.5	0.0003447
SLAIN2	-1.189	-0.2499	10.09	-5.498	0.0003459
KIF26B	1.603	0.6803	6.045	5.497	0.000346
PTCH1	1.368	0.4524	7.676	5.496	0.0003465
TMEM205	-1.434	-0.5196	7.591	-5.493	0.0003486
DUSP4	1.672	0.7416	7.985	5.492	0.000349
PSEN1	1.323	0.4037	9.32	5.491	0.0003499
MYL12A	1.267	0.3412	9.508	5.49	0.00035
PLPPR3	-1.965	-0.9743	5.934	-5.49	0.00035
NCAM1	-2.519	-1.333	5.048	-5.488	0.000351
SCML1	1.681	0.7494	5.727	5.486	0.0003523
RAP2C	1.412	0.4974	7.619	5.484	0.0003536
FYN	-1.62	-0.6962	5.962	-5.482	0.0003547
SH3BP2	1.374	0.4582	7.978	5.483	0.0003547
ISYNA1	-1.698	-0.7638	8.673	-5.481	0.0003553
PNPLA6	-1.339	-0.4209	9.006	-5.473	0.0003611
C1R	2.659	1.411	5.452	5.473	0.0003615
NIN	-1.765	-0.8198	7.506	-5.471	0.0003622
GALNT5	1.835	0.8759	7.641	5.47	0.0003628
RHOA	-1.188	-0.249	11.08	-5.47	0.0003628
C1orf189	-1.597	-0.6751	8.468	-5.47	0.0003628
TINF2	1.566	0.6473	8.542	5.469	0.000363
ANXA2	-1.198	-0.2606	12.21	-5.468	0.0003635
PTPRJ	1.856	0.8924	6.982	5.466	0.0003648
PDGFA	-1.745	-0.8035	5.775	-5.46	0.0003699
PREPL	-1.299	-0.3771	8.77	-5.459	0.0003699
ALDH3B2	-1.397	-0.4822	9.272	-5.459	0.0003701
SLC3A2	1.468	0.5542	9.589	5.458	0.0003706
KATNAL2	-1.541	-0.6235	8.021	-5.457	0.0003707
IGFBP2	-1.456	-0.5421	10.69	-5.456	0.0003717
FLNA	-1.58	-0.6603	7.769	-5.454	0.000373
PRKACA	-1.395	-0.4805	8.236	-5.454	0.000373
PCDHB16	-1.921	-0.9415	4.994	-5.451	0.0003746
AKR7A2	-1.4	-0.4851	7.898	-5.451	0.0003747
PLLP	-1.368	-0.4517	8.551	-5.446	0.0003784
DEFB1	2.018	1.013	4.14	5.444	0.00038
SLC9A9	-1.738	-0.797	5.531	-5.442	0.0003809
S100P	1.992	0.9944	7.531	5.435	0.0003869
GAMT	-1.73	-0.7904	5.375	-5.434	0.0003873
IL6	4.357	2.123	5.88	5.433	0.0003878
SDR16C5	1.919	0.9405	7.183	5.431	0.0003897
CLIC6	-1.278	-0.3538	11.23	-5.43	0.0003901
FBXO27	-1.737	-0.7964	5.877	-5.421	0.0003975
MMP3	-1.956	-0.9682	4.119	-5.42	0.0003982
2010-03-01	-1.438	-0.5241	9.154	-5.42	0.0003983
CKB	-1.326	-0.4075	8.77	-5.419	0.0003984
CRYZ	-1.559	-0.641	6.196	-5.419	0.0003987
CXCL17	1.194	0.2562	11.71	5.417	0.0003999
KIAA1217	1.315	0.3951	9.042	5.416	0.0004005
KLHL2	-1.366	-0.4501	8.014	-5.415	0.0004012
IL23A	2.802	1.486	6.151	5.411	0.0004044
NUFIP2	1.314	0.3942	8.239	5.41	0.0004048
RPS14	-1.41	-0.4954	8.662	-5.41	0.0004048
USP48	-1.313	-0.3925	8.047	-5.407	0.0004071
TNIP3	3.101	1.633	4.776	5.405	0.0004088
ZNF107	1.426	0.5117	6.944	5.4	0.0004125
ASAP3	-1.598	-0.6766	7.556	-5.399	0.000413
ETV3	1.36	0.4436	9.684	5.398	0.0004131
MAF	-1.95	-0.9631	5.047	-5.398	0.0004131
OXA1L	-1.22	-0.2868	10.22	-5.399	0.0004131
RBM11	2.482	1.311	5.008	5.398	0.0004131
ATP1B3	-1.894	-0.9213	7.535	-5.397	0.0004136
INO80D	1.421	0.5066	7.887	5.397	0.0004136
MCRIP1	-1.37	-0.4544	7.321	-5.395	0.0004148
IGSF3	-1.499	-0.5839	6.725	-5.394	0.0004157
FAM114A1	-1.689	-0.7561	5.798	-5.393	0.0004161
PARK7	-1.286	-0.3626	9.752	-5.391	0.0004178
ST3GAL5	1.677	0.7455	5.523	5.389	0.0004189
PITRM1	-1.391	-0.4761	7.992	-5.388	0.0004198
CLIC1	1.203	0.2667	10.16	5.387	0.00042
ACSL3	1.266	0.3401	9.102	5.387	0.00042
SLC7A8	-1.618	-0.6939	8.205	-5.386	0.00042
EIF4E3	1.331	0.413	7.672	5.386	0.00042
ARL3	-1.37	-0.4544	9.746	-5.386	0.00042
EPN3	-1.361	-0.4446	8.41	-5.385	0.00042
RNASEL	1.492	0.5773	6.84	5.385	0.00042
TP73	-1.336	-0.4179	8.487	-5.387	0.00042
SOCS2	2.462	1.3	6.27	5.385	0.00042
SCAP	-1.298	-0.3767	8.295	-5.38	0.0004246
FERMT1	2.049	1.035	8.664	5.379	0.0004253
PCDHB13	-1.604	-0.6821	5.357	-5.378	0.0004253
PTOV1	-1.349	-0.4314	8.736	-5.378	0.0004255
CAMK1D	-1.304	-0.3835	8.003	-5.378	0.0004255
TMEM65	-1.339	-0.4214	7.483	-5.369	0.000433
LSR	1.569	0.6501	9.382	5.369	0.0004332
RBL2	-1.409	-0.4944	8.317	-5.368	0.000434
DMKN	-1.274	-0.3489	10.57	-5.367	0.000434
SCGB2A1	-1.478	-0.5635	9.136	-5.365	0.0004361
FBXO34	1.387	0.4717	7.694	5.365	0.0004361
DNAJB11	1.332	0.4139	8.161	5.363	0.0004376
CAP2	-1.444	-0.53	8.886	-5.36	0.0004405
FBXO36	-1.339	-0.4206	9.022	-5.359	0.0004406
IARS2	-1.428	-0.5135	8.272	-5.357	0.0004426
GRWD1	1.349	0.4324	8.895	5.354	0.0004448
CRTAP	-1.39	-0.4746	9.126	-5.353	0.0004459
APELA	-1.885	-0.9147	4.298	-5.352	0.0004461
PXDC1	-1.363	-0.4465	7.464	-5.352	0.0004461
NECTIN2	1.505	0.5901	9.28	5.35	0.0004472
WFDC6	-2.364	-1.242	6.664	-5.35	0.0004475
RMDN1	-1.526	-0.61	7.107	-5.344	0.0004527
C14orf2	-1.231	-0.3	9.651	-5.341	0.0004556
IMPA2	-1.436	-0.5218	8	-5.341	0.000456
CDC16	-1.319	-0.3998	8.142	-5.34	0.0004566
LRIG1	-1.531	-0.6147	9.346	-5.336	0.0004599
RBM38	1.268	0.3424	9.228	5.336	0.0004599
COX4I1	-1.407	-0.4929	8.032	-5.331	0.0004641
SDC2	-1.792	-0.8414	6.006	-5.329	0.0004662
NR4A2	1.53	0.6138	8.123	5.328	0.0004664
SRD5A3	1.578	0.6581	10.76	5.327	0.0004674
SH3BGRL3	-1.466	-0.5517	10	-5.326	0.0004685
S1PR2	1.577	0.657	6.225	5.326	0.0004685
HIBADH	-1.4	-0.4852	8.271	-5.325	0.0004688
NAA38	-1.427	-0.5133	8.184	-5.323	0.0004703
LDHB	-1.338	-0.4199	9.476	-5.323	0.0004704
ATP6V1A	-1.281	-0.3567	9.1	-5.318	0.0004752
BDKRB2	-1.674	-0.7431	6.445	-5.312	0.0004814
SLC4A4	-2.236	-1.161	5.936	-5.311	0.0004823
CRIP1	-1.558	-0.6395	9.613	-5.31	0.000483
BAIAP2	-1.252	-0.3244	9.908	-5.308	0.0004839
ATP5O	-1.22	-0.2866	9.911	-5.306	0.0004859
SMARCC1	-1.288	-0.3651	8.269	-5.306	0.0004859
PROCR	1.985	0.9891	4.965	5.304	0.0004875
TTLL7	-1.719	-0.7812	8.551	-5.304	0.0004875
NEXN	2.058	1.041	5.365	5.304	0.0004875
CIART	1.601	0.679	7.767	5.302	0.000489
NAAA	-1.352	-0.4346	7.297	-5.302	0.000489
FANCA	-1.983	-0.9875	3.986	-5.301	0.0004896
SLC39A4	-1.339	-0.4211	8.143	-5.3	0.0004896
ERCC1	-1.324	-0.4053	8.885	-5.294	0.0004963
TTYH3	-1.561	-0.6422	7.409	-5.293	0.0004976
ADSSL1	-1.664	-0.7347	7.306	-5.291	0.0004988
CLIC3	-1.741	-0.7997	7.628	-5.288	0.0005019
EPAS1	-1.538	-0.6211	10.7	-5.287	0.0005026
UBL5	-1.293	-0.3707	9.648	-5.287	0.0005026
KIAA1841	-1.437	-0.5229	9.095	-5.287	0.0005026
PALLD	-1.216	-0.282	9.576	-5.28	0.0005078
GTF2F1	1.265	0.339	8.726	5.281	0.0005078
PINLYP	-1.353	-0.4366	8.917	-5.281	0.0005078
ZNF814	-1.651	-0.7235	6.735	-5.281	0.0005078
CACNB1	1.487	0.5729	7.589	5.281	0.0005078
MAP2K6	1.549	0.6316	6.943	5.28	0.000508
UBL3	-1.265	-0.339	9.6	-5.275	0.0005129
DTNB	-1.563	-0.644	6.448	-5.272	0.0005166
RPS11	-1.235	-0.3042	11.22	-5.27	0.0005181
CYP4V2	1.294	0.3714	8.262	5.267	0.0005208
HOMEZ	1.268	0.3431	8.642	5.267	0.0005208
CLEC2D	1.788	0.8381	5.989	5.265	0.0005228
ZHX3	-1.729	-0.7897	6.415	-5.263	0.0005251
PMVK	-1.516	-0.6005	7.002	-5.263	0.0005252
CRYL1	-1.44	-0.5264	7.514	-5.261	0.000526
PSMA4	1.43	0.5164	8.857	5.261	0.000526
PGK1	-1.338	-0.4202	9.009	-5.26	0.0005274
SGCB	-1.293	-0.3712	8.038	-5.26	0.0005274
SSRP1	-1.291	-0.368	8.742	-5.259	0.0005281
WFDC5	2.97	1.57	6.362	5.255	0.0005323
OTOP3	2.326	1.218	4.231	5.25	0.0005376
FSTL1	1.364	0.4475	7.528	5.249	0.0005383
C1orf141	-1.545	-0.6275	7.908	-5.249	0.0005385
RAB38	-1.559	-0.6405	6.692	-5.245	0.000542
PPM1B	1.41	0.4953	8.32	5.246	0.000542
CCNL1	1.538	0.6207	8.287	5.243	0.000544
APPL2	-1.531	-0.6142	7.573	-5.242	0.0005447
LIF	2.648	1.405	7.291	5.242	0.000545
EIF2D	-1.446	-0.5316	7.851	-5.241	0.0005463
DDIT3	1.854	0.8904	6.158	5.239	0.0005483
CDKL5	1.709	0.7729	6.301	5.237	0.0005495
AXIN2	-1.746	-0.8039	5.903	-5.237	0.0005495
TP53AIP1	-1.437	-0.5227	7.832	-5.233	0.0005537
HELB	1.66	0.7312	5.567	5.23	0.0005577
EPHX4	-1.784	-0.8348	4.515	-5.228	0.000559
PODNL1	-1.544	-0.6265	6.164	-5.228	0.0005594
EDIL3	-2.364	-1.241	3.82	-5.226	0.0005616
MTMR2	-1.242	-0.3127	8.728	-5.225	0.0005616
FLT3LG	1.402	0.4872	7.478	5.224	0.0005619
GBE1	-1.459	-0.5452	6.583	-5.224	0.0005619
APOE	-1.771	-0.8248	6.698	-5.225	0.0005619
BCAM	-1.585	-0.6646	7.259	-5.224	0.0005619
MUC4	1.35	0.4325	11.15	5.224	0.0005619
GCH1	2.123	1.086	6.909	5.221	0.0005645
CCDC112	-1.482	-0.5676	6.065	-5.22	0.0005649
MS4A8	-1.477	-0.5625	11.3	-5.221	0.0005649
PARD6G	-2.019	-1.014	4.97	-5.22	0.0005649
NRBP1	1.312	0.3919	8.727	5.22	0.000565
SARAF	-1.315	-0.3953	8.674	-5.219	0.0005653
C16orf70	1.551	0.6334	8.996	5.217	0.0005684
UBE4A	-1.193	-0.255	9.581	-5.215	0.0005695
ACOT8	-1.314	-0.3941	7.893	-5.213	0.0005712
ITGA3	1.29	0.3679	9.526	5.214	0.0005712
RHBDD1	1.412	0.4977	7.736	5.213	0.0005718
NFIC	-1.247	-0.3184	9.645	-5.21	0.0005753
MID2	1.372	0.4566	7.588	5.209	0.0005758
ACADVL	-1.342	-0.4242	8.751	-5.208	0.0005771
TGM1	2.933	1.552	6.547	5.207	0.0005771
PLA2G12A	-1.442	-0.5278	6.178	-5.207	0.0005771
TRAF2	1.502	0.5869	7.166	5.206	0.0005786
MTMR1	1.312	0.3923	8.15	5.205	0.0005797
UQCRC1	-1.254	-0.3267	9.295	-5.202	0.0005829
FRS2	1.33	0.4116	7.706	5.199	0.0005861
SPACA9	-1.347	-0.4293	10.33	-5.199	0.0005861
ANPEP	-1.885	-0.9149	7.768	-5.197	0.0005885
PAPSS1	-1.279	-0.3552	9.186	-5.193	0.0005926
SMPDL3A	-1.437	-0.5229	7.241	-5.192	0.0005934
CYFIP1	-1.329	-0.4103	8.045	-5.192	0.0005934
NSMCE1	-1.396	-0.4818	7.88	-5.191	0.0005948
EFCAB1	-1.395	-0.4805	9.864	-5.19	0.0005948
DAW1	-1.243	-0.3144	10.07	-5.19	0.0005951
ARHGAP17	1.589	0.6684	7.862	5.187	0.0005992
KRT24	3.484	1.801	4.489	5.182	0.0006056
COA1	-1.334	-0.4158	8.881	-5.181	0.0006059
TLE2	-1.436	-0.5216	6.574	-5.177	0.0006109
SLAMF7	2.167	1.116	4.617	5.176	0.0006116
ULK1	-1.738	-0.7977	7.312	-5.175	0.0006126
MPV17L	1.343	0.4256	7.446	5.175	0.000613
ABCC9	-2.509	-1.327	5.191	-5.17	0.0006195
EFHC2	-1.407	-0.4928	9.795	-5.169	0.0006202
NPLOC4	1.243	0.3134	8.634	5.166	0.0006242
AMPD3	1.295	0.3731	8.161	5.16	0.0006312
LGALS2	1.935	0.9525	5.185	5.159	0.0006317
TCF20	1.291	0.3683	8.126	5.16	0.0006317
CDK5	-1.299	-0.3779	8.439	-5.158	0.0006329
LIMK2	-1.389	-0.4744	9.229	-5.156	0.0006358
PPP1CA	-1.206	-0.2701	10.47	-5.155	0.0006372
SLC52A3	1.812	0.8578	5.946	5.152	0.0006404
MAOA	-1.327	-0.4087	8.799	-5.152	0.000641
ADH6	-1.483	-0.5685	6.284	-5.148	0.0006454
GALNT10	-1.383	-0.4675	6.798	-5.147	0.0006464
KREMEN1	-1.668	-0.738	8.632	-5.147	0.0006464
MORN5	-1.561	-0.6427	8.535	-5.147	0.0006465
SVOPL	-1.638	-0.7116	7.421	-5.146	0.0006476
TRIM3	-1.768	-0.8224	5.236	-5.141	0.0006532
SERPINB13	-1.637	-0.7108	8.465	-5.141	0.0006532
COX6B1	-1.24	-0.3103	10.11	-5.138	0.0006567
TXNL4A	-1.328	-0.4093	8.132	-5.138	0.000657
MCC	-1.569	-0.6499	6.77	-5.138	0.000657
PKN2	1.285	0.362	9.106	5.136	0.0006592
UPF1	1.308	0.3873	8.447	5.135	0.0006606
USP22	-1.222	-0.2889	9.764	-5.134	0.0006609
DAD1	-1.177	-0.2346	10.87	-5.132	0.0006642
TNS1	-1.527	-0.6105	7.13	-5.129	0.0006683
VKORC1	-1.247	-0.3189	8.898	-5.128	0.0006694
VEGFB	-1.46	-0.5456	7.886	-5.125	0.0006729
ERMP1	-1.555	-0.6365	8.53	-5.119	0.0006813
OR51B5	2.004	1.003	4.129	5.118	0.0006827
ATP6AP2	-1.33	-0.4111	9.631	-5.115	0.000687
POMGNT1	-1.465	-0.5512	6.999	-5.113	0.00069
SLC25A11	-1.21	-0.2745	9.225	-5.108	0.0006969
ANO10	-1.506	-0.591	6.335	-5.107	0.0006974
SPRR2F	3.516	1.814	6.757	5.107	0.0006974
ARHGAP35	-1.339	-0.4215	9.417	-5.107	0.0006979
CNIH3	-1.804	-0.8516	6.196	-5.106	0.0006981
BTN2A1	1.634	0.7082	7.007	5.103	0.0007018
IL32	2.396	1.261	8.846	5.101	0.0007045
ATP5A1	-1.288	-0.3656	9.222	-5.101	0.0007052
RAB3B	-1.734	-0.7944	7.67	-5.1	0.0007059
UBE2J1	1.251	0.3236	8.993	5.096	0.0007121
MN1	-1.717	-0.7803	6.253	-5.094	0.0007147
FAIM2	-1.879	-0.9101	6.511	-5.093	0.0007153
PSCA	-1.184	-0.2439	12.5	-5.093	0.0007153
TMEM25	-1.557	-0.6386	5.211	-5.093	0.0007153
CATSPERB	1.682	0.7503	6.287	5.092	0.0007159
ITGB2	2.175	1.121	5.204	5.092	0.0007163
VSTM2L	-1.411	-0.4971	8.223	-5.091	0.0007171
MTMR10	-1.517	-0.6009	5.645	-5.09	0.0007177
PTK2B	1.395	0.4802	8.301	5.09	0.0007179
CHMP2A	-1.177	-0.2349	9.739	-5.088	0.0007204
PLTP	-1.41	-0.4959	9.604	-5.086	0.0007234
DNPEP	1.431	0.5168	8.244	5.085	0.0007242
SUN1	-1.305	-0.384	9.795	-5.084	0.0007245
FBXO3	-1.347	-0.4301	8.179	-5.084	0.0007245
CXXC5	-1.347	-0.4298	8.486	-5.08	0.0007305
IKZF2	1.358	0.4413	8.887	5.079	0.0007315
KLK11	-1.58	-0.6595	8.786	-5.078	0.0007322
GPD2	1.572	0.6526	8.043	5.078	0.0007322
SRP14	-1.238	-0.3076	10.38	-5.078	0.0007322
ENTPD6	1.612	0.6886	7.254	5.078	0.0007322
PGLYRP4	1.918	0.9399	6.167	5.078	0.0007324
SLC13A2	-1.776	-0.8283	6.61	-5.071	0.0007435
NOD1	1.656	0.7278	5.424	5.068	0.0007477
LOC100287402	-1.721	-0.7837	6.032	-5.066	0.00075
ATP5L	-1.243	-0.3141	10.03	-5.066	0.00075
CAMTA1	-1.257	-0.3296	9.474	-5.063	0.0007537
TMEM45B	-1.303	-0.382	10.67	-5.063	0.0007544
CTSL	-1.301	-0.3794	7.882	-5.061	0.0007568
KYNU	2.225	1.154	6.814	5.059	0.0007606
RAB30	1.926	0.9457	5.278	5.058	0.0007612
ATAD2	-1.523	-0.6066	5.546	-5.058	0.0007612
GPR137B	-1.486	-0.5714	7.024	-5.057	0.0007626
NEGR1	-1.805	-0.8517	5.576	-5.051	0.0007707
TBCD	-1.412	-0.4975	7.486	-5.051	0.0007707
C11orf49	-1.249	-0.3204	9.737	-5.051	0.0007707
PRKCD	-1.26	-0.3338	8.214	-5.044	0.0007827
CIT	1.518	0.6022	6.832	5.041	0.0007867
DSCAML1	-1.575	-0.6554	7.352	-5.038	0.0007915
NDUFA13	-1.341	-0.4235	7.754	-5.038	0.0007919
ACTR10	-1.252	-0.324	8.565	-5.038	0.0007919
NUDCD1	1.39	0.4747	7.095	5.037	0.0007927
THEMIS2	2.356	1.236	5.818	5.034	0.0007977
TUSC3	-1.297	-0.3751	9.534	-5.032	0.0007997
DYNC1H1	-1.602	-0.6799	9.03	-5.031	0.0008017
CARS2	-1.495	-0.5799	7.846	-5.028	0.0008065
ACADM	-1.432	-0.5178	7.957	-5.027	0.0008083
WNT9A	-1.664	-0.7345	7.138	-5.025	0.0008109
CDC14A	-1.36	-0.4437	9.535	-5.025	0.0008109
SLC4A8	-1.638	-0.7123	7.459	-5.025	0.0008111
AKAP3	1.461	0.5469	6.727	5.02	0.0008171
TCF7L1	-1.569	-0.65	6.628	-5.02	0.0008171
CD83	2.347	1.231	4.133	5.021	0.0008171
CLCF1	2.301	1.202	6.063	5.018	0.0008203
SLC30A9	-1.216	-0.2819	9.737	-5.016	0.000824
SLC27A2	-1.298	-0.3759	10.08	-5.016	0.000824
ASAH2B	1.684	0.7523	7.337	5.016	0.000824
BTG3	1.543	0.6258	7.203	5.015	0.0008243
CARD11	1.534	0.6173	5.945	5.014	0.0008259
RUVBL2	-1.191	-0.2523	10.88	-5.013	0.0008281
PLK3	1.517	0.6008	6.51	5.012	0.0008281
LNPEP	1.31	0.39	8.231	5.012	0.0008281
FYB1	2.307	1.206	6.49	5.008	0.0008351
C1orf116	1.483	0.5681	10.31	5.005	0.0008398
TMEM218	-1.489	-0.5746	7.376	-5.003	0.0008439
SHTN1	-1.319	-0.3994	8.047	-5.002	0.0008456
AGAP3	-1.25	-0.3218	8.485	-4.998	0.0008514
S1PR5	-1.858	-0.8934	5.509	-4.996	0.0008558
GOLIM4	-1.469	-0.5549	6.4	-4.994	0.0008593
OLFM2	-1.579	-0.6591	5.222	-4.991	0.0008641
COL21A1	-1.756	-0.8124	7.398	-4.99	0.0008652
GCSAM	1.86	0.895	4.642	4.989	0.0008672
EFNA3	-1.597	-0.6753	6.403	-4.987	0.0008705
CRLS1	-1.29	-0.3669	7.811	-4.986	0.0008705
SLC9A2	-2.139	-1.097	3.856	-4.987	0.0008705
KMT5C	-1.338	-0.4198	7.331	-4.986	0.0008709
CAV1	-1.72	-0.7822	9.15	-4.986	0.0008709
HINT1	-1.238	-0.3076	7.77	-4.985	0.0008716
KDM2A	1.277	0.3531	9.228	4.985	0.0008717
HGSNAT	-1.325	-0.4063	8.556	-4.984	0.000873
USP46	-1.383	-0.4681	8.076	-4.984	0.000873
HPS5	1.376	0.4608	7.536	4.98	0.0008793
NME4	-1.47	-0.5558	8.086	-4.98	0.0008793
CABCOCO1	-1.336	-0.418	9.988	-4.978	0.000882
ARRB2	-1.349	-0.432	9.348	-4.978	0.000882
LY6D	-1.863	-0.8978	7.535	-4.978	0.000882
ITPKC	1.401	0.4866	7.178	4.977	0.0008839
CLDN7	1.286	0.3624	10.7	4.976	0.0008852
MYDGF	1.371	0.455	7.434	4.975	0.0008855
GLIPR2	1.319	0.3994	9.469	4.973	0.0008893
PSMA5	1.287	0.3645	8.475	4.973	0.0008894
SMARCD2	-1.27	-0.3452	9.637	-4.972	0.0008899
USP6NL	1.322	0.4028	8.19	4.972	0.0008902
LRP10	1.292	0.3691	10.32	4.971	0.0008916
TMEM14A	-1.561	-0.6422	6.888	-4.97	0.0008925
MMP12	-1.943	-0.9583	6.952	-4.965	0.0009015
ANO6	-1.274	-0.3491	9.268	-4.965	0.0009024
TTLL1	-1.411	-0.4967	7.23	-4.963	0.0009057
C6orf48	-1.292	-0.3693	7.423	-4.962	0.000906
STOX2	-1.443	-0.5286	7.296	-4.961	0.0009089
H2AFZ	-1.241	-0.3121	9.37	-4.958	0.0009151
C20orf96	-1.334	-0.4159	8.658	-4.957	0.0009153
HLA-DRB5	1.488	0.5735	4.954	4.954	0.0009218
LGALS17A	1.845	0.8836	4.95	4.952	0.0009253
IL18R1	2.045	1.032	3.695	4.951	0.0009262
USP13	-2.11	-1.077	4.798	-4.951	0.0009268
VPS51	-1.633	-0.7076	6.306	-4.95	0.0009284
TSHZ2	-1.383	-0.4676	8.934	-4.949	0.0009286
ANKRD66	-1.416	-0.5017	9.188	-4.949	0.0009292
MED25	1.181	0.24	9.328	4.948	0.0009294
NDUFA3	-1.216	-0.2822	10.53	-4.948	0.0009297
SLC10A1	-1.579	-0.6592	4.767	-4.947	0.0009318
MTF1	1.221	0.2877	9.913	4.938	0.0009497
SLC37A1	1.262	0.3352	10.33	4.938	0.0009497
R3HDM1	-1.416	-0.5022	7.766	-4.935	0.0009554
CLTCL1	-1.843	-0.8821	5.804	-4.934	0.000957
WNK1	-1.477	-0.5631	8.52	-4.932	0.0009599
MDFIC	-1.38	-0.4643	7.335	-4.932	0.00096
GAPVD1	-1.325	-0.4061	9.005	-4.931	0.0009613
CDK1	-1.937	-0.9539	5.2	-4.931	0.0009613
GABARAPL2	-1.296	-0.3737	8.279	-4.93	0.0009619
NAXE	-1.304	-0.3824	8.683	-4.929	0.0009634
KIFAP3	-1.262	-0.3356	8.503	-4.929	0.0009644
MPP6	-1.637	-0.7112	5.139	-4.923	0.0009756
RGS2	2.792	1.481	4.497	4.923	0.0009756
MTUS1	1.325	0.4056	9.131	4.922	0.0009768
ZNF483	-1.851	-0.888	5.352	-4.919	0.0009836
ANK1	1.838	0.8782	5.566	4.918	0.0009848
C21orf58	-1.363	-0.4469	9.109	-4.915	0.0009904
NOTCH3	-1.725	-0.7867	6.185	-4.91	0.001002
C2orf66	1.566	0.6469	5.757	4.905	0.001012
TRAF3IP2	1.417	0.5026	8.013	4.904	0.001014
IP6K3	-1.522	-0.6058	6.998	-4.901	0.001019
SERPINB2	2.039	1.028	9.949	4.902	0.001019
CRISPLD1	1.475	0.5605	7.578	4.901	0.001019
AP2M1	-1.305	-0.3835	9.559	-4.9	0.00102
BCL6	-1.179	-0.2378	11	-4.899	0.001022
HAGH	-1.271	-0.3457	8.237	-4.898	0.001024
APBB1	-1.593	-0.6716	6.172	-4.898	0.001024
UFC1	-1.217	-0.2829	11.28	-4.898	0.001024
SP140	1.556	0.6382	3.287	4.896	0.001026
STK26	-1.417	-0.5029	6.937	-4.897	0.001026
DCTN2	-1.252	-0.3242	8.773	-4.894	0.00103
PEPD	-1.315	-0.3954	8.406	-4.894	0.00103
AKAP9	-1.411	-0.4965	8.988	-4.893	0.001031
ROPN1L	-1.198	-0.261	11.99	-4.892	0.001033
PLEKHB2	-1.332	-0.4131	8.505	-4.891	0.001035
NINJ1	1.518	0.6024	7.367	4.89	0.001038
SLC16A7	-1.738	-0.7976	5.235	-4.885	0.001047
ARL5A	-1.285	-0.3616	8.048	-4.884	0.001051
MANF	1.471	0.5568	6.613	4.883	0.001052
ATP7B	-1.793	-0.8425	6.575	-4.882	0.001055
GPM6B	-1.889	-0.9179	6.521	-4.878	0.001063
RAB37	-1.605	-0.6828	7.414	-4.876	0.001067
CASTOR1	-1.665	-0.7359	6.654	-4.876	0.001067
ARL15	-1.529	-0.6123	6.157	-4.874	0.00107
POLR2B	-1.274	-0.3498	9.494	-4.872	0.001075
FGD6	1.516	0.5998	6.876	4.87	0.00108
CEP250	-1.327	-0.4084	7.128	-4.868	0.001084
MOCS2	-1.436	-0.5216	7.829	-4.864	0.001094
NPAT	1.557	0.6384	6.544	4.862	0.001096
TXNRD2	-1.272	-0.3473	8.678	-4.862	0.001097
SEMA7A	2.079	1.056	6.685	4.861	0.001098
COX7A1	-1.58	-0.66	6.335	-4.858	0.001104
ATP1B1	1.223	0.29	11.27	4.854	0.001113
LPCAT3	-1.21	-0.2754	9.518	-4.852	0.001117
CDK2AP1	-1.241	-0.312	9.28	-4.853	0.001117
CFAP221	-1.516	-0.6005	8.969	-4.851	0.001121
ETFB	-1.401	-0.4865	8.167	-4.85	0.001122
RPL12	-1.453	-0.5387	8.296	-4.847	0.001129
DUT	-1.416	-0.5018	7.023	-4.846	0.00113
CLGN	-1.616	-0.6923	5.119	-4.845	0.001132
SERF2	-1.257	-0.3295	10.31	-4.842	0.001135
CPEB2	1.635	0.7094	6.257	4.842	0.001135
CAPSL	-1.421	-0.5073	9.053	-4.843	0.001135
UBE2SP1	-1.798	-0.8464	5.466	-4.843	0.001135
MMP14	1.38	0.4648	10.21	4.843	0.001135
CTSA	-1.248	-0.3191	9.886	-4.842	0.001135
ZBTB4	-1.311	-0.3903	8.165	-4.844	0.001135
TNFRSF14	1.373	0.4569	7.722	4.843	0.001135
NSG1	-1.882	-0.9126	5.313	-4.841	0.001139
ASIC1	-1.39	-0.4755	8.586	-4.839	0.001142
HIST1H3H	1.713	0.7763	5.508	4.838	0.001144
EP400	-1.384	-0.4691	9.28	-4.836	0.001148
EPGN	2.795	1.483	3.954	4.834	0.001151
MAP3K20	-1.566	-0.6473	6.261	-4.835	0.001151
CCNB2	-1.966	-0.9752	4.56	-4.828	0.001168
LRBA	-1.596	-0.6743	9.819	-4.827	0.00117
ANKRD36C	1.82	0.8642	7.257	4.825	0.001174
NET1	-1.315	-0.3954	9.759	-4.824	0.001177
RTN3	-1.239	-0.3095	9.518	-4.823	0.001178
SLC6A9	1.241	0.3117	9.99	4.821	0.001182
ANKRD27	-1.333	-0.415	7.37	-4.821	0.001183
UGDH	-1.243	-0.3144	9.679	-4.817	0.001192
GSTM2	-1.654	-0.7263	7.359	-4.816	0.001193
CNN1	-1.502	-0.5864	5.649	-4.816	0.001194
EEF1A1P5	-1.34	-0.4227	11.03	-4.815	0.001194
APEH	-1.225	-0.2928	8.609	-4.814	0.001197
NCOR2	-1.452	-0.5379	7.726	-4.814	0.001197
CETN2	-1.246	-0.317	12.17	-4.81	0.001208
ACKR4	2.088	1.062	6.131	4.808	0.001211
JPT2	-1.27	-0.3453	9.704	-4.808	0.001211
GTF3A	-1.439	-0.5254	8.041	-4.805	0.001218
TMEM68	-1.277	-0.3524	9.173	-4.805	0.00122
2008-03-01	1.337	0.4195	7.16	4.804	0.00122
TPRA1	1.316	0.3963	9.155	4.802	0.001223
IP6K2	-1.252	-0.3239	8.218	-4.802	0.001223
SPOCK1	-1.592	-0.6711	5.485	-4.802	0.001223
FURIN	-1.406	-0.4914	6.813	-4.8	0.00123
APEX1	-1.277	-0.3531	9.604	-4.798	0.001234
SNRNP25	-1.454	-0.5403	6.878	-4.797	0.001236
ERICH5	-1.517	-0.6016	6.762	-4.796	0.001238
DNAH5	-1.701	-0.766	9.8	-4.792	0.001247
PRPS1	-1.215	-0.2805	8.866	-4.789	0.001257
ARHGEF9	-1.329	-0.41	8.193	-4.788	0.001258
CTSZ	-1.419	-0.5044	8.972	-4.787	0.001259
MROH9	-1.656	-0.728	7.303	-4.787	0.001259
EVA1C	1.434	0.5196	8.81	4.783	0.001271
MRPL44	1.388	0.4725	7.79	4.782	0.001272
SRSF8	-1.361	-0.4442	7.441	-4.779	0.00128
F2RL2	1.625	0.7002	4.577	4.779	0.001281
RPS9	-1.354	-0.4369	10.68	-4.778	0.001282
SLC45A4	-1.33	-0.4112	8.282	-4.777	0.001284
DDX6	-1.253	-0.3254	9.549	-4.775	0.001289
ANKRD50	-1.317	-0.3973	7.997	-4.773	0.001294
CBX4	1.666	0.7363	7.317	4.773	0.001295
KHNYN	1.295	0.3734	7.805	4.772	0.001296
VSIR	1.508	0.5923	6.966	4.77	0.001301
HORMAD1	1.623	0.6984	6.048	4.768	0.001308
SLC41A1	-1.218	-0.2849	9.849	-4.766	0.00131
MED11	-1.282	-0.3579	8.237	-4.767	0.00131
TBC1D2B	-1.411	-0.4964	7.579	-4.765	0.001313
ANGPTL4	1.652	0.7243	5.375	4.765	0.001313
DNAJC4	-1.382	-0.4672	8.252	-4.764	0.001315
ARFGAP1	1.224	0.2918	9.102	4.76	0.001326
ST6GALNAC2	-1.288	-0.3657	9.27	-4.759	0.001327
FAM200B	-1.449	-0.5347	7.38	-4.759	0.001327
RAET1E	1.33	0.4117	8.165	4.758	0.001328
ATMIN	1.277	0.3533	8.65	4.759	0.001328
IFITM10	-1.571	-0.6518	8.29	-4.758	0.00133
MICAL1	1.412	0.4974	6.658	4.755	0.001338
CCDC187	-1.395	-0.4798	7.385	-4.753	0.001342
NEXMIF	-1.691	-0.7579	4.028	-4.752	0.001345
C2CD2	1.355	0.4384	7.476	4.749	0.001353
ANKRD45	1.273	0.3485	9.122	4.748	0.001356
NGB	-1.7	-0.7658	4.301	-4.745	0.001364
OVOL2	-1.337	-0.4186	7.448	-4.745	0.001365
STAT5A	1.505	0.5898	6.859	4.744	0.001365
CCDC80	-1.345	-0.4279	10.18	-4.743	0.001368
SEC14L2	-1.56	-0.642	7.48	-4.742	0.001371
ALOX15	-1.672	-0.7413	10.46	-4.742	0.001371
PDIA6	1.212	0.2779	9.574	4.741	0.001372
SCD	1.315	0.3946	9.998	4.741	0.001372
RSPH14	-1.356	-0.4392	7.34	-4.74	0.001374
ELP2	-1.441	-0.5269	6.961	-4.739	0.001377
ACTN1	-1.196	-0.2576	10.3	-4.737	0.001381
NBPF1	-1.435	-0.5211	8.101	-4.736	0.001385
SLC39A6	-1.253	-0.3256	8.52	-4.735	0.001387
SIAH3	-1.625	-0.7002	6.488	-4.735	0.001387
IFT172	-1.402	-0.4873	9.648	-4.731	0.001398
CD2AP	1.273	0.3484	8.178	4.73	0.001399
OBSL1	-1.599	-0.6768	6.571	-4.729	0.001402
APLP2	-1.215	-0.281	11.14	-4.729	0.001402
NAGK	1.269	0.3433	10.57	4.728	0.001404
ZMIZ1	-1.367	-0.4515	7.501	-4.728	0.001404
ARNT	-1.258	-0.3317	8.363	-4.726	0.001409
IAH1	-1.336	-0.4184	7.857	-4.723	0.001418
ESPN	-1.429	-0.5153	6.786	-4.722	0.001418
CRIPT	-1.291	-0.3688	8.713	-4.723	0.001418
FEM1C	1.412	0.4977	7.848	4.721	0.001421
SH3BP1	1.643	0.7162	7.115	4.72	0.001426
PRKDC	-1.763	-0.8181	8.301	-4.719	0.001429
CAPN3	1.633	0.7075	7.599	4.717	0.001433
NHS	-1.621	-0.6969	6.225	-4.716	0.001435
ACACA	-1.384	-0.4693	7.854	-4.715	0.001436
REL	1.352	0.4355	7.995	4.715	0.001436
TAF1B	-1.611	-0.688	5.519	-4.715	0.001436
CCDC146	-1.3	-0.3785	11.05	-4.715	0.001437
EIF3A	-1.18	-0.2394	9.51	-4.714	0.001437
KIAA2012	-1.571	-0.6517	9.099	-4.711	0.001445
CPNE5	1.63	0.7048	4.537	4.712	0.001445
PISD	1.428	0.5142	7.122	4.711	0.001446
WDR64	1.423	0.5087	2.41	4.709	0.001453
AKIRIN2	1.429	0.515	6.376	4.708	0.001454
FAM89B	-1.352	-0.4347	7.269	-4.707	0.001456
KIAA1257	-1.37	-0.454	7.219	-4.707	0.001456
YOD1	1.403	0.4886	6.47	4.705	0.00146
CALM1	-1.339	-0.4211	10.31	-4.705	0.00146
GNPAT	-1.295	-0.3727	7.825	-4.706	0.00146
XPNPEP3	-1.368	-0.4517	8.072	-4.704	0.001462
OSBPL10	-1.368	-0.4525	7.76	-4.704	0.001463
FAM216A	-1.691	-0.7582	5.235	-4.704	0.001463
CDC42EP3	-1.305	-0.3844	8.973	-4.702	0.001466
DEFB4B	3.324	1.733	3.251	4.702	0.001467
KIF1C	-1.401	-0.486	7.415	-4.701	0.001467
COTL1	-1.301	-0.3795	7.63	-4.7	0.00147
FOSL1	2.22	1.151	7.085	4.7	0.00147
HIVEP1	1.494	0.5787	6.591	4.699	0.001474
SHMT1	-1.513	-0.5976	6.642	-4.699	0.001474
RBFOX2	1.264	0.3375	8.093	4.696	0.001483
KLHL13	-1.494	-0.5795	7.541	-4.694	0.001487
LMO7	1.22	0.2871	9.253	4.694	0.001488
PHYH	-1.676	-0.7451	6.927	-4.694	0.001488
ZNF652	-1.453	-0.5386	8.585	-4.693	0.001489
ZNF217	1.231	0.2999	9.357	4.692	0.001491
CYP2A6	-1.988	-0.9916	5.224	-4.69	0.001497
HS6ST2	-1.641	-0.7146	5.68	-4.69	0.001498
OR52H1	2.946	1.559	5.024	4.687	0.001507
BCL2L13	1.362	0.4458	7.935	4.684	0.001515
GRAMD1C	1.3	0.3783	8.448	4.684	0.001516
CTRL	1.536	0.619	5.57	4.68	0.001529
GALNS	-1.202	-0.2651	9.715	-4.68	0.001529
SOCS1	1.853	0.8902	5.777	4.679	0.001529
GRIN3B	-1.505	-0.5893	7.187	-4.678	0.001534
TIMM13	-1.355	-0.4381	8.435	-4.674	0.001544
S100A10	-1.242	-0.3125	11.22	-4.674	0.001544
WLS	-1.356	-0.4395	8.398	-4.674	0.001544
PDE1A	-1.881	-0.9118	5.328	-4.673	0.001547
FBXO44	-1.49	-0.5752	6.941	-4.67	0.001556
NT5C3B	-1.236	-0.3053	8.065	-4.669	0.001558
FITM2	-1.417	-0.5032	6.977	-4.668	0.001561
PHACTR1	2.028	1.02	4.617	4.667	0.001563
HIST1H2BD	1.437	0.5235	8.365	4.667	0.001563
DENND1A	1.399	0.4848	6.499	4.667	0.001563
C1orf194	-1.371	-0.4549	9.665	-4.662	0.001578
MAP3K11	1.273	0.3481	9.056	4.663	0.001578
POLR2E	-1.258	-0.3311	9.948	-4.661	0.001584
EPHB2	-1.451	-0.5372	7.235	-4.66	0.001585
C10orf99	-2.325	-1.217	4.762	-4.66	0.001585
EHD2	-1.451	-0.5367	8.371	-4.659	0.001587
PXK	1.285	0.3618	8.573	4.658	0.001588
PRMT2	-1.245	-0.3165	9.151	-4.657	0.001594
PFKM	-1.282	-0.3584	7.572	-4.656	0.001594
IVL	-2.093	-1.066	6.934	-4.655	0.001598
PET100	-1.445	-0.5311	8.719	-4.654	0.001599
ZHX2	1.416	0.5017	7.312	4.655	0.001599
PXMP4	-1.32	-0.4006	7.45	-4.653	0.001601
PORCN	-1.408	-0.4932	8.859	-4.653	0.001601
XRCC1	-1.176	-0.2336	9.352	-4.653	0.001601
AHR	1.163	0.2184	11.12	4.651	0.001608
NEURL3	1.68	0.7481	6.251	4.651	0.001608
EPB41L2	1.512	0.5968	2.755	4.65	0.00161
TMEM5	-1.29	-0.367	7.583	-4.645	0.001628
MDH1	-1.339	-0.4214	7.395	-4.641	0.00164
H3F3B	1.261	0.3344	11	4.64	0.001644
RELA	1.242	0.3131	9.124	4.639	0.001648
UACA	-1.412	-0.4974	7.114	-4.638	0.001649
TTC9	1.26	0.3339	9.625	4.637	0.001654
MYOF	-1.226	-0.2941	9.789	-4.636	0.001656
ASPHD2	1.719	0.7818	4.314	4.634	0.001661
FST	1.917	0.939	6.893	4.632	0.00167
WASHC4	1.263	0.3372	7.918	4.632	0.00167
BTBD7	-1.338	-0.4198	7.657	-4.632	0.00167
PLD3	-1.217	-0.2831	8.954	-4.631	0.001671
KRT13	-2.573	-1.364	8.499	-4.627	0.001685
ACO2	-1.203	-0.2671	10.28	-4.626	0.001687
FAH	-1.632	-0.707	5.897	-4.626	0.001688
TCF25	-1.231	-0.3002	9.526	-4.625	0.001689
SOSTDC1	-1.735	-0.7947	5.351	-4.623	0.001696
ALDH1L1	-1.373	-0.4573	6.439	-4.622	0.001699
C4orf3	-1.216	-0.2819	8.628	-4.622	0.001699
KCNK5	-1.473	-0.559	6.639	-4.622	0.001699
PNRC2	1.232	0.3008	9.12	4.621	0.001701
ENAH	-1.438	-0.5238	10.29	-4.62	0.001701
CCNI2	1.609	0.6858	5.911	4.62	0.001701
[truncated: 16,621 more rows]
