# Supplementary material for: Polarized Entry of Human Parechoviruses in the Airway Epithelium
Source: Front Cell Infect Microbiol. 2018 Aug 22;8:294. doi: 10.3389/fcimb.2018.00294 (PMC6119779; doi:10.3389/fcimb.2018.00294)
Supplement: Supplementary file 5 [file Table_3.XLS]

## Sheet: Sheet1
Supplementary Table 3. All differentially expressed genes in HPeV1-infected HAE versus HPeV3-infected HAE.
Fold change (FC), Log2 FC (logFC), Average expression (AveExprs), t-statistics (t), Adjusted p value (adj.P.Val)
Gene	FC	logFC	AveExprs	t	adj.P.Val
GBP1	-2.11	-1.077	9.101	-11.41	5.127e-06
XRN1	-1.724	-0.786	7.947	-11.29	5.127e-06
RNF213	-1.871	-0.9041	8.396	-11.13	5.127e-06
SULF2	2.086	1.06	9.439	10.87	5.674e-06
ZC3HAV1	-1.722	-0.7844	9.41	-10.54	6.833e-06
CD38	-1.937	-0.9539	10.36	-10.49	6.833e-06
HACD3	1.586	0.6651	9.498	9.888	1.53e-05
PTGFR	2.981	1.576	6.851	9.808	1.53e-05
TRANK1	-1.701	-0.7667	8.255	-9.735	1.534e-05
STS	-1.867	-0.9006	8.738	-9.635	1.63e-05
SP110	-1.679	-0.7474	9.904	-9.393	2.223e-05
TAP1	-2.231	-1.158	7.551	-9.266	2.533e-05
PIK3AP1	-2.004	-1.003	7.183	-9.139	2.684e-05
AKR1C2	2.039	1.028	10.33	9.039	2.684e-05
IRF1	-1.61	-0.6867	8.788	-9.034	2.684e-05
CYBRD1	2.281	1.19	6.734	9.005	2.684e-05
PARP9	-1.516	-0.6007	9.926	-8.997	2.684e-05
HDAC9	-2.434	-1.283	8.353	-9.076	2.684e-05
DLX5	3.111	1.638	6.58	8.887	2.745e-05
JAK2	-1.79	-0.8397	7.521	-8.825	2.745e-05
SERPINB3	1.694	0.76	11.14	8.9	2.745e-05
DDX60L	-2.227	-1.155	8.37	-8.825	2.745e-05
CD47	-1.745	-0.8031	9.211	-8.834	2.745e-05
RABGAP1L	-1.681	-0.7495	8.469	-8.82	2.745e-05
WARS	-1.754	-0.8106	10.96	-8.787	2.795e-05
USP18	-1.806	-0.8529	9.451	-8.762	2.807e-05
RIPOR2	-2.958	-1.565	6.53	-8.741	2.807e-05
CAPN13	1.491	0.5761	10.68	8.677	3.03e-05
GBP4	-2.574	-1.364	7.791	-8.612	3.074e-05
ADA2	1.476	0.5619	10.04	8.586	3.074e-05
LAPTM4B	1.579	0.6589	8.927	8.59	3.074e-05
TLE3	1.625	0.7004	7.278	8.636	3.074e-05
VTCN1	1.942	0.9576	8.165	8.578	3.074e-05
DUOX2	-3.557	-1.831	8.394	-8.499	3.337e-05
RTP4	-1.851	-0.888	8.293	-8.514	3.337e-05
TRIM21	-1.905	-0.9298	7.977	-8.478	3.373e-05
SAMD9	-1.688	-0.7549	10.29	-8.4	3.781e-05
NCOA2	-1.425	-0.5114	8.835	-8.364	3.929e-05
OPTN	-1.546	-0.6281	9.406	-8.331	4.046e-05
GBP5	-3.433	-1.78	6.411	-8.312	4.046e-05
UBE2L6	-1.483	-0.5686	10.78	-8.306	4.046e-05
ITGB6	1.628	0.7027	7.515	8.287	4.087e-05
HRASLS2	-2.872	-1.522	9.015	-8.25	4.273e-05
CMPK2	-1.875	-0.9071	8.509	-8.227	4.362e-05
C1GALT1	-1.584	-0.6631	8.152	-8.2	4.382e-05
APOBEC3G	-1.991	-0.9937	7.705	-8.203	4.382e-05
CFLAR	-1.425	-0.5106	11.35	-8.17	4.535e-05
TRIM38	-1.819	-0.863	8.523	-8.094	4.812e-05
ERP27	2.532	1.34	6.773	8.104	4.812e-05
PRDX2	1.502	0.5868	9.403	8.1	4.812e-05
TPD52L1	2.246	1.167	8.706	8.12	4.812e-05
CD274	-2.922	-1.547	6.817	-8.042	5.112e-05
CD36	3.344	1.742	7.886	8.041	5.112e-05
AKR1C3	1.702	0.7673	8.95	7.994	5.474e-05
MXD4	1.569	0.6498	9.293	7.968	5.638e-05
CYFIP2	2.187	1.129	6.511	7.933	5.795e-05
GNAL	1.801	0.8486	8.645	7.925	5.795e-05
SULT2B1	2.012	1.008	8.971	7.932	5.795e-05
DCAKD	1.3	0.378	10.71	7.905	5.922e-05
SLCO4C1	1.937	0.9535	9.044	7.864	6.107e-05
NDUFA2	1.357	0.4401	9.876	7.855	6.107e-05
OAS3	-1.838	-0.8782	8.706	-7.86	6.107e-05
RBMS2	-1.648	-0.7211	9.362	-7.854	6.107e-05
ISG20	-2.473	-1.306	7.501	-7.842	6.152e-05
PABPC1	1.475	0.5612	10.12	7.77	6.827e-05
CASP1	-2.509	-1.327	6.302	-7.778	6.827e-05
IFIT2	-2.409	-1.268	9.305	-7.762	6.836e-05
GBP3	-1.571	-0.6516	10.26	-7.731	6.942e-05
MMP7	2.269	1.182	7.392	7.74	6.942e-05
NUB1	-1.595	-0.6732	9.667	-7.735	6.942e-05
TMEM268	-1.595	-0.6736	8.773	-7.697	7.297e-05
SAMD9L	-1.873	-0.9056	9.77	-7.677	7.315e-05
ALDH3A2	1.408	0.4936	9.562	7.683	7.315e-05
ZFYVE26	-1.576	-0.6563	7.459	-7.673	7.315e-05
CLDN8	2.774	1.472	5.192	7.667	7.315e-05
RSAD2	-1.904	-0.9291	7.877	-7.643	7.554e-05
PATL1	-1.619	-0.6955	8.996	-7.633	7.6e-05
GSDMB	-2.103	-1.072	8.819	-7.626	7.605e-05
NFE2L3	-2.26	-1.176	8.263	-7.62	7.605e-05
MMP10	2.625	1.392	9.724	7.59	7.948e-05
ETV7	-1.872	-0.9044	6.861	-7.568	8.096e-05
CASP10	-2.05	-1.036	7.191	-7.569	8.096e-05
TNFRSF14-AS1	-1.598	-0.6762	7.391	-7.548	8.266e-05
LMO2	-1.873	-0.9051	7.785	-7.534	8.266e-05
PARP14	-1.563	-0.6446	10.37	-7.532	8.266e-05
AMBRA1	-1.48	-0.5661	9.06	-7.541	8.266e-05
CXCL14	2.494	1.319	8.078	7.493	8.818e-05
KIAA0513	-1.379	-0.4634	9.744	-7.482	8.914e-05
HK1	1.568	0.6486	8.74	7.47	9.01e-05
FMO6P	1.766	0.8201	7.977	7.46	9.095e-05
NMI	-1.881	-0.9118	8.21	-7.453	9.108e-05
PLXDC2	2.282	1.19	6.053	7.444	9.178e-05
QKI	-1.507	-0.5914	8.78	-7.425	9.421e-05
CD68	-2.941	-1.556	8.007	-7.412	9.558e-05
FAM46A	-1.984	-0.9887	7.106	-7.404	9.564e-05
ITM2C	1.324	0.4054	9.962	7.401	9.564e-05
LAMP3	-1.692	-0.7588	9.55	-7.365	0.0001014
SLC25A28	-1.951	-0.9645	6.971	-7.36	0.0001015
SLFN5	-1.522	-0.6059	10.3	-7.341	0.000102
ECH1	1.253	0.3259	11.74	7.343	0.000102
ZNFX1	-1.651	-0.7232	9.419	-7.343	0.000102
SP140L	-1.791	-0.8405	6.973	-7.332	0.000102
RUBCN	-1.757	-0.8131	7.385	-7.333	0.000102
IL18BP	-2.341	-1.227	7.238	-7.307	0.0001061
SELENOP	2.112	1.079	6.577	7.272	0.0001124
LAP3	-1.352	-0.4354	10.83	-7.261	0.000114
AMTN	3.134	1.648	6.56	7.253	0.0001147
SIDT1	-1.78	-0.8321	7.086	-7.205	0.0001249
C19orf66	-1.712	-0.7753	7.662	-7.195	0.0001263
EXT1	-1.599	-0.6774	9.444	-7.179	0.0001289
TMEM64	1.85	0.8874	6.509	7.161	0.0001325
FLRT3	1.535	0.6181	7.237	7.139	0.0001358
HSDL2	1.602	0.68	8.064	7.141	0.0001358
GPX2	1.875	0.9066	9.493	7.132	0.0001366
PCYOX1	1.556	0.638	8.674	7.118	0.0001369
TSPAN7	2.595	1.376	7.509	7.123	0.0001369
SLC24A1	-2.086	-1.06	6.614	-7.12	0.0001369
PNPT1	-1.572	-0.653	8.72	-7.113	0.000137
GPX4	1.343	0.4252	10.81	7.094	0.0001401
TM7SF2	1.566	0.6467	9.516	7.094	0.0001401
RAB7B	2.255	1.173	6.461	7.089	0.0001402
BIRC3	-2.6	-1.378	8.81	-7.078	0.0001421
TRIB2	-1.981	-0.9865	7.709	-7.068	0.0001427
MT1X	1.878	0.9093	11.64	7.071	0.0001427
SMCHD1	-1.697	-0.7628	7.326	-7.038	0.0001492
UHRF1BP1	-1.663	-0.7336	6.456	-7.039	0.0001492
PARP12	-1.733	-0.7936	9.838	-7.004	0.0001584
RNF114	-1.514	-0.5984	9.041	-6.997	0.0001592
ACAT1	1.883	0.9129	6.169	6.989	0.0001607
C12orf57	1.437	0.5231	8.354	6.957	0.0001645
EPHX1	1.904	0.9287	10.71	6.953	0.0001645
HLA-F	-2.168	-1.116	9.411	-6.955	0.0001645
KRT5	1.687	0.7545	11.84	6.965	0.0001645
MX2	-1.566	-0.6474	9.691	-6.972	0.0001645
MOSPD3	1.51	0.5949	7.977	6.965	0.0001645
DOCK4	-1.689	-0.7562	6.854	-6.951	0.0001645
CNGA4	1.622	0.6977	9.166	6.917	0.0001712
ANKRD36C	-2.361	-1.24	7.257	-6.921	0.0001712
IRAK4	-1.582	-0.6619	6.854	-6.922	0.0001712
TAP2	-1.846	-0.8846	8.234	-6.919	0.0001712
OASL	-2.417	-1.273	8.828	-6.907	0.0001723
AIM2	-3.152	-1.656	5.078	-6.909	0.0001723
REEP6	1.634	0.708	8.156	6.898	0.0001739
PARP8	-1.722	-0.7839	9.345	-6.893	0.0001744
FMO2	1.852	0.8893	7.1	6.888	0.0001748
IDO1	-3.253	-1.702	7.526	-6.886	0.0001748
APOL4	-1.81	-0.8563	6.932	-6.881	0.0001753
SERPINE2	2.068	1.048	7.389	6.87	0.0001771
HESX1	-2.935	-1.553	5.519	-6.869	0.0001771
CASP4	-1.309	-0.3888	10.28	-6.862	0.0001784
ADAM28	-1.892	-0.9196	8.164	-6.852	0.0001796
C21orf91	-1.877	-0.9084	8.164	-6.856	0.0001796
HSD17B4	1.335	0.4171	8.689	6.845	0.0001812
SUSD4	2.252	1.171	7.164	6.839	0.0001821
BCL11A	1.773	0.826	6.828	6.834	0.0001826
TMEM63C	1.798	0.8467	6.365	6.822	0.0001861
SCLT1	-1.499	-0.5838	7.217	-6.817	0.0001867
STAT2	-1.688	-0.7556	8.797	-6.814	0.0001869
DNPH1	1.305	0.3845	9.981	6.809	0.0001876
FUS	-1.276	-0.3518	9.369	-6.801	0.0001895
PRKRA	1.451	0.5374	8.104	6.789	0.0001927
IFIH1	-1.847	-0.8853	9.175	-6.776	0.0001968
TCF4	-1.275	-0.35	9.521	-6.756	0.0002024
PRR5L	2.071	1.05	6.301	6.759	0.0002024
FBXO6	-1.566	-0.6471	7.875	-6.752	0.0002028
HUNK	2.008	1.006	5.96	6.742	0.0002037
MT1L	1.694	0.7601	10.33	6.742	0.0002037
SCNN1B	1.762	0.8175	6.846	6.741	0.0002037
HELZ2	-1.954	-0.9666	6.23	-6.734	0.0002056
RDH10	1.318	0.3981	10.25	6.726	0.0002075
LIFR	-2.419	-1.274	6.422	-6.709	0.0002136
DHX58	-1.717	-0.7799	8.131	-6.689	0.0002213
PSMB9	-1.857	-0.8932	9.782	-6.677	0.0002247
NT5DC2	1.689	0.756	8.186	6.676	0.0002247
EPSTI1	-2.002	-1.001	7.935	-6.668	0.0002268
KIAA1217	-1.401	-0.486	9.042	-6.661	0.0002277
MAGED1	1.449	0.5355	8.885	6.662	0.0002277
CTSB	1.247	0.3188	11.67	6.645	0.0002322
PDCD4	1.417	0.5027	8.757	6.643	0.0002322
MGAT3	-1.821	-0.865	6.71	-6.648	0.0002322
CD14	2.03	1.021	6.505	6.629	0.0002378
ELF5	1.432	0.5181	8.84	6.612	0.0002438
NOX4	2.352	1.234	4.685	6.612	0.0002438
TAGAP	-2.056	-1.04	6.426	-6.608	0.0002444
APOBEC3F	-1.468	-0.5543	8.862	-6.602	0.0002455
PDK2	1.415	0.5004	9.809	6.6	0.0002455
BMPR1A	-1.386	-0.4706	9.513	-6.592	0.0002486
ADGRG1	1.356	0.4392	10.08	6.582	0.000252
ATP6V1C2	1.608	0.6854	8.131	6.557	0.0002643
EFCAB10	1.421	0.5074	9.306	6.552	0.0002647
COPA	1.265	0.3395	9.591	6.551	0.0002647
ZNF703	1.878	0.909	7.034	6.533	0.0002732
NINJ2	1.462	0.5479	8.03	6.51	0.0002848
GMPR	-2.108	-1.076	8.121	-6.502	0.0002883
DDX58	-1.725	-0.7869	8.908	-6.496	0.0002905
RHBDF2	-1.667	-0.7375	8.67	-6.48	0.0002987
PRKD2	-1.596	-0.6741	8.611	-6.473	0.000299
LGALS1	1.615	0.6916	8.844	6.474	0.000299
TPM1	1.718	0.7807	7.868	6.472	0.000299
F2R	1.674	0.7432	7.508	6.461	0.0003013
IFI35	-1.723	-0.7852	8.442	-6.461	0.0003013
NDUFB8	1.334	0.4156	8.89	6.463	0.0003013
LRRC26	2.003	1.002	7.569	6.45	0.000307
MICAL1	-1.594	-0.6731	6.658	-6.435	0.0003153
VAT1	1.635	0.7089	7.697	6.426	0.0003193
TRIM31	-4.568	-2.191	6.107	-6.422	0.0003208
PAFAH1B3	1.408	0.4938	8.134	6.417	0.0003224
CDK19	1.637	0.7106	6.588	6.405	0.0003292
GPD1L	1.477	0.5624	7.965	6.387	0.0003396
STARD5	-1.709	-0.7728	7.625	-6.381	0.0003424
SERINC2	1.281	0.3571	10.13	6.374	0.0003443
PTN	-1.712	-0.7761	5.575	-6.374	0.0003443
SPTLC3	1.525	0.6088	7.023	6.359	0.0003539
IDH1	1.486	0.5719	8.199	6.353	0.0003566
CCL28	-1.956	-0.968	8.427	-6.326	0.000375
FAXDC2	1.405	0.4903	9.029	6.322	0.0003763
CDC25B	-2.207	-1.142	7.096	-6.319	0.0003777
KLF4	-1.583	-0.6627	7.234	-6.314	0.0003793
DNER	1.609	0.6862	7.143	6.311	0.0003804
CLCA2	2.542	1.346	6.971	6.308	0.0003812
SERPING1	-2.771	-1.471	7.184	-6.305	0.0003819
HOMER2	1.48	0.5652	8.644	6.302	0.0003819
TNFSF13B	-3.11	-1.637	6.374	-6.289	0.0003913
STX11	-1.877	-0.9082	8.121	-6.287	0.0003913
SLC46A3	1.436	0.5216	8.061	6.282	0.0003925
HLA-E	-1.643	-0.7165	10.16	-6.281	0.0003925
BRIP1	-3.779	-1.918	4.798	-6.273	0.0003971
FRMD3	-3.286	-1.716	6.647	-6.269	0.0003981
PEBP1	1.535	0.6186	8.258	6.268	0.0003981
IGFBP3	-1.785	-0.8361	10.62	-6.263	0.0004007
ALDH3B2	1.467	0.5528	9.272	6.259	0.0004023
VNN3	-1.94	-0.9564	7.93	-6.255	0.0004039
CXCL11	-3.344	-1.742	7.434	-6.252	0.0004044
BATF2	-2.365	-1.242	6.687	-6.241	0.0004082
ALDH2	1.633	0.7078	8.009	6.24	0.0004082
NRARP	1.655	0.7267	5.494	6.245	0.0004082
UBA7	-1.492	-0.5771	8.572	-6.243	0.0004082
CCSER1	-1.997	-0.9979	4.118	-6.235	0.0004093
RPL5	1.358	0.4419	10.62	6.234	0.0004093
SIAE	1.375	0.4598	8.815	6.231	0.0004108
IFI16	-1.351	-0.4345	10.47	-6.223	0.0004137
PSMB10	-1.497	-0.5818	8.327	-6.223	0.0004137
BST2	-1.555	-0.6372	8.731	-6.221	0.0004137
WDFY1	-1.477	-0.5623	8.743	-6.217	0.0004155
EIF3L	1.552	0.6342	8.542	6.215	0.0004157
TGFBI	2.284	1.192	8.708	6.213	0.0004157
GCA	-1.89	-0.9187	6.708	-6.205	0.0004212
SLC25A10	1.532	0.6159	8.183	6.201	0.0004227
REXO2	1.305	0.3839	8.314	6.199	0.0004231
CTSS	-1.28	-0.356	10.9	-6.195	0.0004247
IKBKE	-1.942	-0.9574	8.614	-6.192	0.0004257
CDH6	2.34	1.226	5.703	6.183	0.0004288
ZBTB20	-1.432	-0.518	9.548	-6.183	0.0004288
KPNB1	-1.335	-0.4164	9.126	-6.182	0.0004288
RNF43	-1.493	-0.5785	7.796	-6.184	0.0004288
LRTOMT	1.406	0.4917	10.33	6.173	0.0004349
DOPEY1	-1.526	-0.61	7.816	-6.166	0.0004358
RPS6KC1	-1.553	-0.6348	6.622	-6.165	0.0004358
MB	2.311	1.208	7.395	6.165	0.0004358
ATXN7	-1.339	-0.4217	8.507	-6.166	0.0004358
GPI	1.5	0.5847	8.536	6.163	0.000436
GLTP	1.385	0.4698	8.209	6.153	0.0004414
VIM	1.85	0.8873	8.516	6.155	0.0004414
FAM122C	-1.41	-0.4962	8.04	-6.15	0.0004422
FN1	1.95	0.9633	9.556	6.145	0.0004422
REEP5	1.396	0.481	9.107	6.147	0.0004422
GPT2	-1.792	-0.8419	6.963	-6.147	0.0004422
APOL6	-1.378	-0.4621	7.656	-6.124	0.0004607
HSD11B2	2.875	1.523	7.253	6.121	0.0004623
SLC6A20	-1.527	-0.6107	9.394	-6.116	0.0004651
RICTOR	-1.379	-0.4638	7.788	-6.088	0.0004915
PATL2	-1.834	-0.8751	7.078	-6.068	0.0005111
TLR6	1.974	0.9813	4.517	6.061	0.0005126
KLHDC7B	-1.902	-0.9275	6.645	-6.061	0.0005126
BCL2L14	-1.914	-0.9365	6.105	-6.06	0.0005126
SLC13A2	1.986	0.9901	6.61	6.061	0.0005126
DDX60	-1.438	-0.5242	8.749	-6.056	0.0005151
STAT1	-1.304	-0.3828	10.67	-6.054	0.0005153
BBOX1	2.002	1.001	6.096	6.053	0.0005153
IGFBP5	2.314	1.21	8.575	6.051	0.0005155
FH	1.356	0.4389	7.613	6.043	0.000522
CYB5R3	1.273	0.3478	10.27	6.039	0.000525
SESN3	2.486	1.314	5.53	6.03	0.000533
GTPBP2	-1.557	-0.6386	8.357	-6.027	0.0005343
NEXN	-2.27	-1.183	5.365	-6.024	0.0005365
ITGAV	1.564	0.6456	7.983	6.016	0.000542
PRDX6	1.423	0.5085	9.258	6.016	0.000542
IFI44	-1.624	-0.6997	8.013	-6.002	0.0005543
KRT39	-3.024	-1.596	4.56	-6.002	0.0005543
STMN1	1.531	0.6146	6.398	5.999	0.0005559
DDIT3	-2.027	-1.019	6.158	-5.997	0.0005566
GPX3	1.52	0.6039	8.832	5.994	0.000558
HHLA2	1.424	0.5096	8.409	5.979	0.000571
TFCP2L1	1.844	0.8826	7.527	5.977	0.000571
ALPK3	-1.552	-0.6341	6.25	-5.977	0.000571
TECR	1.279	0.3545	10.47	5.98	0.000571
FAM117B	1.593	0.6717	8.088	5.972	0.0005728
RPL37A	1.219	0.2857	11.68	5.97	0.0005728
SMARCA1	1.359	0.4422	7.334	5.973	0.0005728
NUPR1	-1.344	-0.4265	11.54	-5.966	0.0005742
TMEM62	-1.563	-0.6439	7.379	-5.967	0.0005742
SGPL1	1.408	0.494	8.373	5.947	0.0005959
RUFY4	-2.339	-1.226	5.62	-5.944	0.0005984
PMAIP1	-1.729	-0.7899	6.916	-5.925	0.0006211
TMEM140	-1.991	-0.9935	7.683	-5.919	0.0006272
TRAFD1	-1.522	-0.6057	8.783	-5.9	0.0006506
OGT	1.326	0.4071	8.359	5.897	0.0006526
IFNL1	-4.303	-2.105	6.121	-5.886	0.0006668
SYCP2	-1.913	-0.9356	4.805	-5.879	0.0006741
RNF128	2.135	1.094	5.69	5.877	0.0006747
SH2D4A	-1.372	-0.4564	8.371	-5.87	0.000683
BAZ1A	-1.386	-0.4714	8.087	-5.842	0.0007153
HTR2B	-2.345	-1.23	6.032	-5.842	0.0007153
OAT	1.289	0.3659	9.083	5.84	0.0007153
SLC15A3	-2.23	-1.157	6.129	-5.844	0.0007153
ZC3H12C	-1.708	-0.7726	7.482	-5.84	0.0007153
SELENBP1	1.424	0.5097	9.302	5.847	0.0007153
LARGE2	1.616	0.6922	9.013	5.813	0.0007547
TLL1	1.972	0.9794	5.699	5.812	0.0007547
SLC7A11	-1.645	-0.7178	7.273	-5.807	0.0007601
DSC2	1.904	0.9293	8.327	5.8	0.0007685
IL2RG	-2.872	-1.522	7.589	-5.799	0.0007685
BTN2A2	-1.492	-0.5775	8.523	-5.79	0.00077
HDLBP	1.25	0.3215	11.31	5.792	0.00077
IFIT1	-1.669	-0.7394	9.806	-5.794	0.00077
SERPINF1	1.42	0.5057	8.53	5.795	0.00077
SLC29A3	1.512	0.5961	7.296	5.79	0.00077
SLC5A5	1.982	0.9872	6.483	5.794	0.00077
GABARAP	1.218	0.2842	11.31	5.788	0.0007702
TMCO3	1.713	0.7766	7.886	5.786	0.0007702
ST14	-1.251	-0.3232	10.96	-5.787	0.0007702
CYP39A1	1.638	0.7115	5.576	5.781	0.0007756
FGD6	-1.638	-0.7119	6.876	-5.78	0.0007756
EIF3K	1.241	0.3111	10.52	5.773	0.0007791
PLEKHB1	1.359	0.4424	10.5	5.776	0.0007791
RERG	1.694	0.7607	6.797	5.774	0.0007791
FAM173B	1.664	0.7343	7.18	5.769	0.0007837
CASTOR2	1.511	0.5953	8.364	5.758	0.0007965
UPK1B	1.435	0.5212	11.38	5.758	0.0007965
SCD5	1.733	0.7933	9.301	5.759	0.0007965
RPS13	1.351	0.434	9.532	5.754	0.0007996
HAGHL	1.502	0.5865	6.866	5.753	0.0007996
ACE2	-1.88	-0.9107	6.85	-5.749	0.0008045
IMPA2	1.475	0.5609	8	5.741	0.0008159
BNIP3L	1.341	0.4234	10.28	5.737	0.0008208
APOL3	-1.971	-0.9792	6.467	-5.729	0.0008335
ALDH1A1	1.366	0.4495	11.65	5.725	0.0008376
ABCC5	1.42	0.5055	6.907	5.718	0.0008475
TRIM22	-1.367	-0.4506	10.08	-5.715	0.0008514
SH3TC2	-2.382	-1.252	6.574	-5.714	0.0008514
PLXDC1	1.445	0.5315	7.894	5.708	0.0008587
ANKH	1.99	0.9927	5.956	5.707	0.0008594
CA5B	1.321	0.4017	8.721	5.703	0.0008629
ZBP1	-3.592	-1.845	5.506	-5.702	0.0008638
BTN3A3	-2.394	-1.26	5.779	-5.698	0.000866
VPS25	1.28	0.3564	8.936	5.699	0.000866
NNT	1.589	0.6677	6.958	5.694	0.0008707
TMEM9	1.512	0.5968	8.551	5.692	0.0008707
C3orf38	-1.458	-0.544	7.225	-5.693	0.0008707
PCBD1	1.334	0.4158	8.706	5.669	0.0009116
SUSD3	-1.886	-0.9155	5.69	-5.657	0.0009339
RARRES3	-1.268	-0.3428	10.16	-5.649	0.0009407
TNFAIP2	-2.27	-1.183	9.017	-5.648	0.0009407
C3AR1	-2.661	-1.412	3.796	-5.65	0.0009407
ISG15	-2.322	-1.216	8.105	-5.651	0.0009407
PROS1	2.609	1.383	8.024	5.641	0.0009528
QARS	1.317	0.3977	8.805	5.638	0.0009563
TGM2	-1.773	-0.8261	9.229	-5.637	0.0009563
LRRC49	1.511	0.5955	7.998	5.634	0.0009584
TCEA3	1.574	0.654	7.142	5.634	0.0009584
GLRX	-1.497	-0.582	9.024	-5.632	0.0009597
ANOS1	2.116	1.081	6.728	5.63	0.0009604
CNTNAP2	1.597	0.6753	6.283	5.628	0.0009618
IVNS1ABP	1.361	0.4449	8.617	5.616	0.0009844
BTN3A1	-1.749	-0.8065	7.28	-5.611	0.0009893
CYP2F1	1.892	0.9199	9.992	5.611	0.0009893
IL15RA	-1.809	-0.8554	7.008	-5.61	0.0009893
HNF4G	-1.458	-0.544	7.331	-5.609	0.0009898
KIAA1324	2.433	1.283	8.234	5.607	0.000991
TKFC	1.268	0.3428	8.95	5.606	0.0009916
CHCHD10	1.405	0.4911	7.746	5.595	0.001012
MYL12A	-1.272	-0.3473	9.508	-5.588	0.001025
EPB41L2	-1.644	-0.7168	2.755	-5.585	0.001029
ADH1C	2.135	1.094	7.585	5.58	0.001037
C6orf62	-1.243	-0.314	10.02	-5.573	0.001051
CEACAM1	-2.156	-1.109	9.783	-5.57	0.001056
VCAN	2.243	1.166	5.076	5.566	0.001059
GJA1	2.434	1.283	7.61	5.567	0.001059
PPP1R15B	-1.271	-0.3456	8.551	-5.556	0.001081
RPS21	1.253	0.3253	10.86	5.547	0.001098
TXNIP	-1.39	-0.4752	10.37	-5.545	0.001099
COMMD6	1.289	0.3668	8.827	5.537	0.001111
GMDS	-1.415	-0.5004	7.713	-5.537	0.001111
EPN3	1.373	0.4573	8.41	5.539	0.001111
CD9	1.232	0.3008	11.43	5.534	0.001116
FRK	-1.288	-0.3653	9.112	-5.531	0.001118
DYNLT1	-1.253	-0.3254	10.42	-5.531	0.001118
TMPRSS3	-1.374	-0.4587	9.436	-5.525	0.001128
TCTA	1.293	0.3702	8.743	5.525	0.001128
CMTR1	-1.43	-0.5161	8.289	-5.519	0.001138
PLAGL1	-1.562	-0.643	5.688	-5.514	0.001149
DUOXA2	-3.591	-1.844	7.964	-5.512	0.001151
MLKL	-2.403	-1.265	5.593	-5.509	0.001153
TRAPPC1	1.268	0.3429	10.13	5.51	0.001153
MISP	-1.327	-0.4085	8.439	-5.507	0.001154
XAF1	-1.445	-0.5307	9.939	-5.506	0.001154
POSTN	3.875	1.954	4.882	5.504	0.001156
PRPF3	-1.283	-0.3596	8.593	-5.501	0.001162
TNFSF10	-1.302	-0.3805	11.71	-5.496	0.001172
SIRT2	1.339	0.4213	8.833	5.492	0.001177
HEY1	2.252	1.171	7.393	5.491	0.001177
DBN1	1.659	0.73	6.879	5.486	0.001182
FMO3	1.99	0.993	7.137	5.486	0.001182
PIGX	1.389	0.4737	7.379	5.488	0.001182
CTDSPL	1.348	0.4306	8.003	5.477	0.001187
TDRD7	-1.379	-0.4636	8.463	-5.483	0.001187
GPR161	1.818	0.8627	5.167	5.478	0.001187
CD2AP	-1.323	-0.4035	8.178	-5.477	0.001187
NDST1	1.45	0.5359	7.562	5.477	0.001187
SCGB2A1	1.49	0.5753	9.136	5.477	0.001187
MUC4	-1.369	-0.4535	11.15	-5.479	0.001187
PANK1	1.702	0.7672	6.365	5.472	0.001187
TNFAIP3	-1.43	-0.5157	11.22	-5.474	0.001187
SFXN3	1.352	0.435	9.202	5.472	0.001187
RIPK1	-1.368	-0.4522	7.783	-5.474	0.001187
RAB3D	1.479	0.5651	7.844	5.471	0.001187
ATP5D	1.376	0.4605	8.651	5.47	0.001188
MFGE8	1.433	0.5194	8.383	5.466	0.001195
RPL37	1.26	0.3335	10.84	5.463	0.001201
HK2	-1.859	-0.8947	6.649	-5.46	0.001205
CYP2B6	1.508	0.593	8.259	5.45	0.001226
ZNF385A	1.489	0.5741	7.657	5.449	0.001226
H2AFV	1.411	0.497	8.966	5.45	0.001226
ARPC1B	1.35	0.4332	8.918	5.443	0.001237
PSMB8	-1.422	-0.5083	9.797	-5.443	0.001237
PSMB8-AS1	-1.511	-0.5956	7.067	-5.441	0.001238
FAT2	2.111	1.078	7.505	5.441	0.001238
APEH	1.257	0.3304	8.609	5.432	0.001258
ERLIN2	1.3	0.3781	7.645	5.429	0.001264
FER1L6	1.333	0.4143	9.34	5.426	0.001269
AK7	1.244	0.3144	10.31	5.423	0.001274
FMO5	2.235	1.161	5.544	5.423	0.001274
HLA-C	-1.5	-0.5852	10.58	-5.418	0.001279
LAG3	-2.435	-1.284	5.62	-5.417	0.001279
G0S2	-2.327	-1.219	6.225	-5.417	0.001279
PPP3CA	1.339	0.4212	8.657	5.416	0.001279
ERAP2	-2.028	-1.02	5.094	-5.419	0.001279
OGFR	-1.359	-0.4423	8.793	-5.411	0.001286
GTPBP1	-1.407	-0.493	7.955	-5.411	0.001286
LOC101929895	-2.651	-1.407	5.916	-5.409	0.00129
TMEM139	-1.681	-0.7495	7.875	-5.403	0.001302
EIF3F	1.317	0.3972	8.671	5.402	0.001304
OST4	1.286	0.3634	10.49	5.396	0.001319
RNPEP	1.379	0.4631	9.746	5.39	0.001332
TJP3	-1.252	-0.3238	9.212	-5.384	0.001337
CIDEB	1.341	0.4232	9.058	5.386	0.001337
PMEPA1	1.397	0.4821	8.328	5.385	0.001337
TENM2	1.645	0.7177	7.006	5.386	0.001337
SPNS2	-1.957	-0.9684	6.56	-5.381	0.001345
TCP1	1.288	0.365	10.09	5.376	0.001356
PDCD10	-1.244	-0.3149	8.828	-5.373	0.001361
LTA4H	1.301	0.3792	8.365	5.369	0.00137
LOC728743	-1.859	-0.8944	5.759	-5.364	0.001384
OGFRL1	1.738	0.7972	7.344	5.363	0.001384
IRAK3	-1.707	-0.7713	9.184	-5.351	0.001417
HLA-B	-1.467	-0.5525	11.14	-5.35	0.001419
KIAA1191	1.285	0.3618	8.68	5.348	0.001421
PTGR1	1.334	0.4157	8.658	5.346	0.001426
PPARGC1A	1.494	0.5788	7.895	5.331	0.001467
TNC	2.238	1.162	7.428	5.331	0.001467
PKN2	-1.297	-0.3756	9.106	-5.329	0.001471
MTMR11	-1.579	-0.6592	6.637	-5.327	0.001472
APOL2	-1.51	-0.5948	8.223	-5.321	0.001491
AK1	1.374	0.4588	8.292	5.31	0.001517
APOD	-1.452	-0.5377	9.996	-5.309	0.001517
HTRA1	1.767	0.8214	6.494	5.309	0.001517
PTPRG	1.944	0.9591	4.855	5.311	0.001517
APOL1	-1.432	-0.5177	9.413	-5.308	0.001517
CYYR1	1.608	0.6855	5.885	5.288	0.001571
CACNG4	1.917	0.9385	7.163	5.288	0.001571
PTRHD1	1.349	0.4321	8.864	5.289	0.001571
HERC6	-1.368	-0.4518	9.074	-5.289	0.001571
KAT2B	-1.407	-0.493	7.692	-5.29	0.001571
STOML3	1.337	0.419	11.02	5.282	0.001587
CR1L	-2.093	-1.066	6.523	-5.276	0.001603
TNNC1	1.723	0.7853	7.276	5.276	0.001603
PPP2R1A	1.215	0.2815	9.584	5.271	0.001613
RBP1	1.592	0.6704	6.179	5.27	0.001613
EFL1	-1.533	-0.6159	7.947	-5.272	0.001613
CMTM4	1.639	0.7126	9.459	5.267	0.001616
POLD2	1.296	0.3743	9.49	5.268	0.001616
PERP	1.255	0.3276	10.74	5.267	0.001616
MX1	-1.253	-0.3249	11.31	-5.264	0.001619
PARP10	-1.524	-0.6083	6.995	-5.265	0.001619
MICAL2	-1.448	-0.5342	7.092	-5.263	0.001619
AKR1C1	1.502	0.5864	10.64	5.26	0.001622
TLR3	-1.659	-0.73	8.838	-5.26	0.001622
SLC38A1	1.292	0.3695	8.683	5.259	0.001622
CLEC2D	-1.785	-0.8359	5.989	-5.251	0.001648
GANC	-1.486	-0.5718	7.694	-5.249	0.001652
PSMA2	-1.314	-0.3936	8.279	-5.248	0.001653
CX3CL1	-1.349	-0.4314	10.12	-5.246	0.001658
SLC13A3	-1.541	-0.6242	6.464	-5.244	0.001662
PELI1	-1.484	-0.5694	7.881	-5.241	0.001666
TALDO1	1.225	0.2928	8.853	5.241	0.001666
RFX5	-1.428	-0.5139	8.707	-5.239	0.00167
TRIM26	-1.326	-0.4066	8.592	-5.238	0.00167
MED13	-1.224	-0.2914	9.495	-5.237	0.001673
PAPD7	-1.396	-0.4817	7.029	-5.232	0.001683
PROM2	1.448	0.5336	7.19	5.232	0.001683
CHMP5	-1.221	-0.2878	9.926	-5.226	0.001703
TNIP1	-1.53	-0.6132	8.586	-5.224	0.001704
PSAT1	-1.432	-0.5179	8.505	-5.224	0.001704
RPL3	1.371	0.4549	11.39	5.219	0.001718
GRAMD1A	1.485	0.5702	7.145	5.216	0.001729
FUT3	-1.386	-0.4711	7.657	-5.214	0.001732
DENND2D	-1.329	-0.4099	7.993	-5.211	0.00174
HLA-G	-1.615	-0.6914	7.507	-5.21	0.001742
NFIC	1.247	0.3182	9.645	5.207	0.00175
SLC25A6	1.248	0.3193	10.95	5.205	0.001752
SLFN12	-1.435	-0.5215	7.156	-5.204	0.001753
RNF19A	-1.518	-0.6017	7.225	-5.202	0.001758
FAM83D	1.603	0.681	7.27	5.198	0.001769
DHRS11	1.349	0.4317	6.887	5.195	0.001779
LOC100419583	-1.847	-0.8849	7.484	-5.192	0.001787
DDB1	1.254	0.3267	9.788	5.184	0.0018
ELK4	-1.203	-0.2663	10.46	-5.186	0.0018
GBP2	-1.969	-0.9771	6.962	-5.185	0.0018
NIPAL2	1.279	0.3553	8.304	5.186	0.0018
HSH2D	-1.783	-0.8344	7.12	-5.186	0.0018
MSRB3	1.541	0.6235	6.15	5.177	0.001829
RPL7A	1.3	0.3789	10.38	5.175	0.001831
TPGS2	1.204	0.2681	9.885	5.167	0.00186
SECTM1	-2.072	-1.051	7.568	-5.166	0.001862
FAXC	1.732	0.7928	4.844	5.162	0.001877
POLR2I	1.325	0.406	9.333	5.16	0.001878
DSC3	1.675	0.7441	7.246	5.157	0.001884
TOR1B	-1.783	-0.8345	8.036	-5.158	0.001884
PGK1	1.33	0.4118	9.009	5.155	0.001889
FAM111A	-1.304	-0.3832	8.827	-5.154	0.001889
LMO7	-1.244	-0.3152	9.253	-5.152	0.001895
CXCL16	-1.416	-0.5015	9.651	-5.152	0.001895
HPGD	1.64	0.7141	6.142	5.149	0.001904
SERPINB11	2.744	1.456	6.053	5.148	0.001904
ALDH3A1	1.575	0.6554	11.88	5.144	0.001915
MMP3	1.89	0.9183	4.119	5.141	0.001926
SLC41A1	1.237	0.3072	9.849	5.139	0.001927
SH3BGRL	1.203	0.2666	9.66	5.139	0.001927
LPAR1	-1.334	-0.4162	7.521	-5.138	0.001929
DAPP1	-1.406	-0.4913	8.623	-5.136	0.001933
XRCC5	1.199	0.2623	8.86	5.13	0.001957
CHST11	-1.315	-0.3948	9.173	-5.128	0.001959
NFKBIZ	-1.556	-0.6381	9.138	-5.125	0.001969
MGST3	1.295	0.3734	9.694	5.124	0.001971
ALDH7A1	1.763	0.8182	6.516	5.123	0.001972
STRIP1	-1.267	-0.3413	8.263	-5.122	0.001973
SLC9A3R1	1.244	0.315	10.82	5.121	0.001975
CDC42EP1	-1.81	-0.8562	7.842	-5.119	0.001981
SQOR	-1.448	-0.5341	9.15	-5.113	0.002
SYAP1	1.31	0.3893	8.769	5.113	0.002
CSF1	-2.166	-1.115	6.515	-5.106	0.002025
PNPLA6	1.313	0.3924	9.006	5.103	0.002036
APOBEC3D	-1.571	-0.6518	7.316	-5.098	0.002052
SLC1A3	-1.929	-0.9475	6.077	-5.098	0.002052
PEMT	1.438	0.5236	6.645	5.089	0.002091
CEP72	-1.694	-0.7604	5.655	-5.088	0.002093
DAB2IP	-1.357	-0.4408	7.736	-5.085	0.002101
DLGAP5	2.004	1.003	4.197	5.084	0.002101
SLC26A2	1.628	0.7032	7.633	5.082	0.002106
RCN2	1.349	0.4322	8.343	5.082	0.002106
GDA	-1.344	-0.4264	9.16	-5.08	0.002112
KDM2A	-1.283	-0.3597	9.228	-5.078	0.002113
RPLP2	1.245	0.3157	10.67	5.078	0.002113
SMPD3	-1.413	-0.4984	6.69	-5.075	0.002121
LY6G5C	1.373	0.4578	8.018	5.072	0.002132
H2AFZ	1.247	0.3189	9.37	5.066	0.002159
ARHGAP26	-1.33	-0.411	9.012	-5.062	0.002173
CMYA5	-1.581	-0.6608	4.817	-5.059	0.002183
HLA-DQB1	-1.529	-0.613	8.235	-5.054	0.002205
IFNL3	-2.425	-1.278	6.458	-5.052	0.002213
FARSB	1.255	0.3281	8.585	5.05	0.002218
GSTA4	1.64	0.7136	6.026	5.041	0.002253
EIF2AK2	-1.252	-0.3241	10.4	-5.042	0.002253
CAPNS1	1.199	0.2623	11.04	5.03	0.002307
CEBPZOS	1.282	0.3581	8.711	5.029	0.002308
PDGFRL	-1.864	-0.8983	4.604	-5.028	0.002311
EPAS1	1.505	0.5902	10.7	5.023	0.00233
C16orf71	1.192	0.2537	9.432	5.019	0.002339
RTL8A	1.359	0.4423	7.345	5.019	0.002339
ANKIB1	-1.257	-0.33	8.65	-5.02	0.002339
RPL4	1.249	0.3209	10.45	5.02	0.002339
BMP3	-1.562	-0.6434	6.588	-5.015	0.002355
PRDM1	-1.961	-0.972	8.371	-5.011	0.002371
FILIP1L	1.812	0.8574	7.005	5.007	0.002386
SETX	-1.451	-0.5371	7.76	-5.007	0.002386
DNMBP	-1.292	-0.3696	8.699	-5.004	0.002397
TP53AIP1	1.414	0.4994	7.832	5	0.002412
ATP6V0A1	1.215	0.2812	9.447	4.998	0.002416
RPS23	1.307	0.3866	9.968	4.998	0.002416
GDF15	-1.83	-0.8722	8.928	-4.998	0.002416
STXBP1	1.268	0.3431	9.006	4.997	0.002417
TNFRSF10A	-1.65	-0.7228	7.119	-4.992	0.002439
DIRC2	1.302	0.3803	8.823	4.991	0.002441
MCRIP1	1.338	0.4202	7.321	4.99	0.002443
PRDX3	1.203	0.2669	9.589	4.987	0.002456
CXCL10	-1.966	-0.9753	8.752	-4.984	0.002466
ICK	-1.303	-0.3815	8.449	-4.978	0.002493
CD164L2	1.388	0.4731	9.291	4.978	0.002493
ADGRA3	1.836	0.877	6.565	4.974	0.002508
ZMYND10	1.173	0.2305	11.91	4.973	0.002509
SCML1	-1.601	-0.6792	5.727	-4.973	0.002509
ELOVL7	-1.982	-0.9869	5.312	-4.971	0.002515
ADAMTSL4	-1.98	-0.9857	5.763	-4.969	0.002518
LPCAT2	1.446	0.5319	8.604	4.969	0.002518
NFKBIA	-1.481	-0.5664	9.923	-4.967	0.002522
AXIN2	1.696	0.7624	5.903	4.967	0.002522
RFLNB	2.011	1.008	5.2	4.96	0.002555
ACOX1	1.287	0.3637	7.99	4.958	0.002564
ZNHIT1	1.258	0.3309	8.314	4.953	0.002576
SYNPO	1.363	0.4467	8.145	4.954	0.002576
SERINC5	1.44	0.5259	8.264	4.953	0.002576
TMEM27	-2.47	-1.304	5.144	-4.955	0.002576
MEF2A	-1.236	-0.3051	8.986	-4.952	0.00258
FMR1	-1.232	-0.3007	8.681	-4.949	0.002589
LRP2BP	1.548	0.6301	6.616	4.947	0.002601
ZMAT3	1.432	0.5177	7.49	4.944	0.00261
PRRC2C	-1.236	-0.3056	9.158	-4.942	0.002618
TPRG1L	1.222	0.289	9.155	4.939	0.002627
RPS16	1.242	0.3124	11.11	4.939	0.002627
RPL27	1.223	0.2903	8.833	4.938	0.002629
SP100	-1.434	-0.5199	8.423	-4.933	0.002657
STARD10	1.263	0.3373	9.884	4.931	0.002665
ROBO1	1.513	0.5974	7.155	4.928	0.002677
PRPS1	1.221	0.2886	8.866	4.926	0.002683
GXYLT2	1.765	0.8197	7.655	4.926	0.002683
MUC20	-1.293	-0.3712	10.69	-4.922	0.002691
HACD2	1.331	0.4123	9.858	4.922	0.002691
PIGG	-1.354	-0.4367	7.568	-4.923	0.002691
TLR2	-2.056	-1.04	7.274	-4.922	0.002691
SERPINB10	-2.092	-1.065	7.128	-4.92	0.002697
MPV17	1.225	0.2929	8.933	4.916	0.002715
PTOV1	1.314	0.3943	8.736	4.915	0.002715
RAB15	1.852	0.8894	6.88	4.912	0.002734
KLK11	1.556	0.6376	8.786	4.91	0.002735
SOX21	1.586	0.6655	6.41	4.91	0.002735
EHD4	-1.463	-0.5491	8.556	-4.91	0.002735
CLGN	1.626	0.7011	5.119	4.907	0.00274
SSBP2	1.256	0.3284	10.07	4.908	0.00274
TMEM107	1.426	0.5122	8.467	4.907	0.00274
EIF4EBP2	1.229	0.2973	10.19	4.905	0.002744
ENPP3	1.379	0.4632	7.876	4.904	0.002747
RPL10A	1.345	0.4279	8.836	4.897	0.002787
IFNL2	-2.177	-1.122	5.748	-4.892	0.002812
ANKRD45	-1.282	-0.3589	9.122	-4.889	0.002829
CAPS	1.275	0.3502	11.14	4.887	0.002836
PLVAP	-1.96	-0.9709	3.145	-4.887	0.002836
QPCTL	1.363	0.447	6.105	4.885	0.002843
RPS4Y1	1.329	0.4103	7.817	4.884	0.002843
LDLRAD1	1.259	0.3326	11.43	4.883	0.002848
FBXO36	1.304	0.383	9.022	4.88	0.002849
EOGT	1.308	0.3876	8.18	4.881	0.002849
FOXN2	-1.587	-0.6665	7.01	-4.879	0.002849
CRIPT	1.302	0.381	8.713	4.879	0.002849
N4BP1	-1.285	-0.362	10.65	-4.88	0.002849
SLC25A39	1.399	0.4848	7.123	4.876	0.002864
SLC51A	-1.708	-0.7725	7.218	-4.871	0.002889
KCNIP3	1.927	0.9462	4.98	4.871	0.002889
OTUD4	-1.301	-0.3799	9.154	-4.868	0.002902
NRP2	-1.437	-0.5226	7.463	-4.868	0.002902
USP42	-1.283	-0.3601	8.047	-4.861	0.002942
CHP1	1.239	0.3097	10.69	4.858	0.002958
ITGAE	1.665	0.7358	5.608	4.857	0.002958
SLC39A4	1.306	0.3847	8.143	4.842	0.003046
RANGAP1	-1.48	-0.566	7.668	-4.843	0.003046
TTYH3	1.503	0.5877	7.409	4.843	0.003046
OAS1	-1.499	-0.584	10.52	-4.84	0.003057
PODXL	-1.226	-0.2941	9.425	-4.837	0.003074
FAS	-1.443	-0.5293	8.172	-4.833	0.003087
CBLN3	-1.872	-0.9045	6.235	-4.833	0.003087
CLIC3	1.66	0.7308	7.628	4.832	0.003087
G6PC3	1.187	0.2468	10.03	4.833	0.003087
SP1	-1.334	-0.4156	9.902	-4.829	0.003105
GLB1L2	1.337	0.4194	8.934	4.827	0.003117
SRPX2	-1.496	-0.5813	8.837	-4.82	0.00316
MUC15	-1.196	-0.2577	10.97	-4.819	0.003162
MDK	-1.687	-0.7548	9.725	-4.817	0.003167
DNAJB11	-1.294	-0.3718	8.161	-4.817	0.003167
CCL5	-4.016	-2.006	6.572	-4.818	0.003167
FAM114A1	1.596	0.6745	5.798	4.811	0.003203
SP140	-1.544	-0.6269	3.287	-4.81	0.003206
C9orf24	1.254	0.3268	11.38	4.808	0.003214
LDLRAP1	1.274	0.349	8.392	4.805	0.003225
USP13	2.065	1.046	4.798	4.806	0.003225
IL1A	-2.274	-1.185	7.739	-4.804	0.003233
VNN1	-1.699	-0.7643	6.865	-4.802	0.003241
HDAC5	1.47	0.5558	7.604	4.797	0.003245
LY6E	-1.198	-0.2606	11.68	-4.798	0.003245
MUC13	-2.547	-1.349	8.76	-4.797	0.003245
MIR205HG	1.318	0.3979	9.199	4.797	0.003245
DCLRE1C	-1.367	-0.4505	7.662	-4.799	0.003245
CERK	1.545	0.6275	5.936	4.801	0.003245
SLC16A7	1.721	0.7834	5.235	4.799	0.003245
GCNT4	-1.46	-0.5455	6.856	-4.789	0.003296
CREG1	1.339	0.4215	8.199	4.788	0.003302
LRRC75A-AS1	1.319	0.3991	8.889	4.786	0.003314
ZNF267	-1.414	-0.4994	7.755	-4.784	0.003321
MTCH2	1.282	0.3584	9.845	4.783	0.003327
HLA-A	-1.624	-0.6996	10.09	-4.778	0.003345
IRF7	-1.599	-0.677	7.707	-4.777	0.003345
OR52N4	-2.04	-1.029	4.717	-4.779	0.003345
PHKB	1.307	0.3864	7.23	4.777	0.003345
MAP3K13	-1.527	-0.6106	9.443	-4.778	0.003345
DEPTOR	1.948	0.9621	6.411	4.774	0.003364
CPE	1.674	0.7429	6.327	4.771	0.003383
TMEM106A	-1.891	-0.9193	6.711	-4.755	0.003498
SLC9A8	-1.244	-0.3151	8.844	-4.754	0.003498
RPL15	1.204	0.2674	11.38	4.755	0.003498
SPART	-1.199	-0.2616	9.513	-4.751	0.003511
TPK1	-1.686	-0.7536	4.983	-4.75	0.003511
B2M	-1.279	-0.3553	11.82	-4.751	0.003511
GNPAT	1.298	0.3763	7.825	4.751	0.003511
FMO4	1.455	0.5406	6.695	4.748	0.003524
SOD2	-1.583	-0.663	10.35	-4.747	0.003526
GALNT1	1.373	0.4577	7.089	4.745	0.003535
SORT1	1.346	0.4284	9.277	4.742	0.003561
ZNF710	-1.443	-0.5291	7.733	-4.74	0.003571
PML	-1.568	-0.6489	9.388	-4.739	0.003571
PRRX2	-1.64	-0.7141	5.755	-4.737	0.003582
C4orf19	-1.742	-0.8007	7.867	-4.736	0.003583
TMSB10	-1.235	-0.3042	11.4	-4.735	0.003587
RPL23	1.297	0.3756	10.31	4.734	0.003589
COX6B1	1.219	0.2858	10.11	4.733	0.003596
NQO1	1.226	0.2934	10.42	4.731	0.003601
RCAN1	-2.013	-1.009	7.443	-4.731	0.003601
NDUFC1	-1.312	-0.3922	8.658	-4.731	0.003601
PPM1K	-1.6	-0.6779	6.341	-4.729	0.00361
ZNF107	-1.364	-0.448	6.944	-4.728	0.003613
ARHGEF2	-1.256	-0.3288	7.423	-4.726	0.003624
KLHL13	1.498	0.5833	7.541	4.725	0.003625
TKT	1.341	0.4237	9.572	4.722	0.003645
MTUS1	-1.309	-0.3889	9.131	-4.72	0.003659
DEFB1	-1.838	-0.8779	4.14	-4.718	0.003673
GPR137B	1.446	0.5323	7.024	4.71	0.003732
KRT24	-3.109	-1.636	4.489	-4.708	0.003742
TMEM37	1.549	0.6315	7.556	4.703	0.003776
LYN	-1.382	-0.4669	9.633	-4.703	0.003776
GPC1	1.549	0.6314	6.615	4.7	0.003795
ACAA2	1.474	0.5596	6.836	4.697	0.003801
TIA1	-1.425	-0.5112	8.25	-4.698	0.003801
ATP6V1F	1.201	0.2638	9.676	4.699	0.003801
DMTF1	-1.262	-0.3361	8.723	-4.697	0.003801
AIFM2	-1.713	-0.7768	5.094	-4.695	0.003813
ITPKC	-1.374	-0.4589	7.178	-4.694	0.003822
FAM13C	1.488	0.5739	6.432	4.691	0.003839
MICB	-2.032	-1.023	6.303	-4.689	0.003848
CCND3	-1.315	-0.3953	9.523	-4.689	0.003848
RNF19B	-1.313	-0.3927	8.95	-4.685	0.003876
ATP6V1A	1.243	0.3141	9.1	4.682	0.00389
PRKAR2A	1.459	0.5453	6.463	4.682	0.00389
C9orf84	-1.967	-0.976	3.753	-4.682	0.003893
AHCYL1	1.208	0.2724	10.48	4.681	0.003897
NTN1	1.267	0.3414	8.352	4.68	0.003899
SCAP	1.255	0.3275	8.295	4.678	0.003912
EMP2	1.196	0.2581	10.58	4.675	0.003916
ETV3	-1.305	-0.3842	9.684	-4.676	0.003916
MMP12	1.869	0.9023	6.952	4.675	0.003916
TRAF2	-1.441	-0.527	7.166	-4.674	0.00392
HCP5	-2.012	-1.009	7.515	-4.669	0.003963
USP46	1.355	0.4385	8.076	4.668	0.003963
CYP2J2	-1.344	-0.4266	8.963	-4.666	0.00398
ICAM2	-1.628	-0.7033	3.688	-4.665	0.003988
CLIC1	-1.174	-0.2309	10.16	-4.664	0.003991
ABHD2	1.248	0.3198	10.6	4.662	0.004
SREBF1	-1.254	-0.3268	8.881	-4.658	0.004036
H1F0	-1.635	-0.709	8.664	-4.656	0.004046
GIPC2	1.876	0.9079	5.696	4.654	0.004061
RUVBL2	1.176	0.234	10.88	4.649	0.004096
PLP2	1.202	0.2649	10.86	4.648	0.0041
CTSV	1.813	0.8587	7.007	4.646	0.004117
PKP1	1.661	0.7322	7.503	4.645	0.004119
GAMT	1.597	0.6752	5.375	4.642	0.004142
ADH7	1.677	0.7459	10.15	4.641	0.004145
NUFIP2	-1.264	-0.3382	8.239	-4.641	0.004146
RPS25	1.189	0.2494	10.85	4.64	0.004146
PPM1L	1.476	0.5618	7.389	4.639	0.004149
CGAS	-2.01	-1.007	5.263	-4.638	0.004157
RASGEF1B	-1.424	-0.5101	8.171	-4.636	0.004161
CRLS1	1.267	0.3411	7.811	4.636	0.004161
PLLP	1.305	0.3841	8.551	4.631	0.004199
TNFRSF10D	1.472	0.5576	6.518	4.631	0.004199
CCRL2	-1.87	-0.9033	4.876	-4.631	0.004199
SPARC	1.863	0.8974	6.993	4.628	0.00422
KRT23	-1.648	-0.7209	8.371	-4.624	0.004241
PPP2R2A	-1.287	-0.3645	9.202	-4.625	0.004241
NOP53	1.339	0.421	7.441	4.623	0.004255
UQCRQ	1.211	0.2762	9.181	4.621	0.004263
TXNL4A	1.29	0.3677	8.132	4.616	0.004284
APOBEC3A	-3.368	-1.752	8.183	-4.617	0.004284
GRK5	-1.72	-0.7827	4.792	-4.616	0.004284
NOS3	-2.061	-1.043	4.721	-4.616	0.004284
CDON	2.075	1.053	5.574	4.616	0.004284
RELB	-1.712	-0.7755	6.786	-4.617	0.004284
NLRC5	-1.938	-0.9548	5.371	-4.615	0.004285
GALNT5	-1.669	-0.7388	7.641	-4.613	0.004295
TMEM171	-2.998	-1.584	6.357	-4.611	0.004311
PECR	1.338	0.4205	8.075	4.611	0.004311
NT5C3A	-1.834	-0.8747	7.657	-4.605	0.004363
YIF1B	1.234	0.3033	8.3	4.603	0.004373
ADGRE5	-1.281	-0.3568	9.991	-4.603	0.004375
SCIN	-1.36	-0.4437	8.68	-4.6	0.004393
TMEM219	-1.375	-0.4594	6.702	-4.599	0.004396
MINDY2	-1.483	-0.5687	6.529	-4.599	0.004396
PIK3R1	1.472	0.5574	7.461	4.593	0.004451
PHACTR4	-1.418	-0.5043	8.998	-4.591	0.004461
FTO	1.32	0.4004	9.724	4.591	0.004461
PLCH1	-1.219	-0.2858	9.19	-4.59	0.004462
SLCO4A1	-2.123	-1.086	4.567	-4.59	0.004462
RAB11FIP1	-1.22	-0.2873	9.998	-4.586	0.004489
2008-03-01	-1.32	-0.4003	7.16	-4.584	0.004511
PDP1	-1.597	-0.6755	8.888	-4.583	0.004514
ATP1A1	1.231	0.3	10.58	4.581	0.004524
HP1BP3	1.27	0.3448	7.795	4.581	0.004524
PLEKHA7	-1.232	-0.3011	8.825	-4.579	0.004534
ENPP5	1.313	0.3931	10.2	4.578	0.004542
PTAFR	-1.639	-0.7128	8.43	-4.577	0.004545
NXPE3	1.603	0.6803	4.669	4.577	0.004545
ADRB2	-1.569	-0.6501	7.285	-4.575	0.004561
CLU	1.437	0.5232	9.112	4.568	0.004604
USP22	1.195	0.2571	9.764	4.568	0.004604
WBP1L	1.267	0.3414	9.751	4.569	0.004604
C6	1.57	0.651	8.767	4.569	0.004604
DUSP16	-1.287	-0.3638	7.17	-4.567	0.004611
CRNDE	1.35	0.433	10.12	4.563	0.004647
ICAM1	-1.945	-0.9596	8.645	-4.561	0.004661
UQCR11	1.217	0.2832	9.066	4.557	0.004694
SUN2	1.504	0.589	6.097	4.557	0.004694
ACADM	1.384	0.4693	7.957	4.556	0.004706
KRTAP6-1	-1.577	-0.6573	5.27	-4.554	0.004721
FTL	1.352	0.4351	10.39	4.55	0.00476
RHOC	1.219	0.286	8.97	4.549	0.004761
RRM1	1.299	0.3776	7.92	4.548	0.004761
CPNE1	1.188	0.2484	9.242	4.548	0.004764
FGFBP1	-1.541	-0.6237	8.544	-4.547	0.004764
2004-09-01	-1.998	-0.9986	3.655	-4.545	0.00478
VEGFB	1.398	0.4835	7.886	4.541	0.004814
SIX2	1.392	0.4773	7.595	4.539	0.004833
XPNPEP3	1.353	0.4358	8.072	4.539	0.004833
SORCS2	1.567	0.6482	6.401	4.536	0.004856
PCYT1B	1.242	0.3124	8.237	4.534	0.004873
HS3ST1	-1.496	-0.5814	8.109	-4.533	0.004884
C14orf2	1.193	0.2545	9.651	4.53	0.004906
SH3KBP1	-1.27	-0.3453	8.992	-4.528	0.004923
TTC39B	-1.378	-0.4629	7.053	-4.525	0.004938
RPL11	1.21	0.2755	10.73	4.526	0.004938
ROGDI	1.244	0.3146	9.191	4.526	0.004938
LPCAT3	1.195	0.2568	9.518	4.524	0.004943
IGFBP4	-1.367	-0.451	7.474	-4.52	0.004983
FBXO7	-1.21	-0.2755	9.855	-4.517	0.005016
SRI	1.328	0.409	10.08	4.516	0.005019
HLA-DMB	-1.602	-0.6794	6.614	-4.511	0.005069
ADI1	1.263	0.3366	7.914	4.511	0.005069
UBD	-1.688	-0.7553	6.099	-4.508	0.005086
ENO1	1.256	0.3289	11	4.508	0.005086
NAAA	1.292	0.3695	7.297	4.508	0.005086
AP2M1	1.277	0.3526	9.559	4.506	0.005097
IRS1	-1.396	-0.4813	6.634	-4.505	0.005097
SRGAP1	-1.372	-0.456	7.858	-4.505	0.005097
PLK3	-1.454	-0.5399	6.51	-4.504	0.005103
RORB	-1.693	-0.7599	4.579	-4.501	0.00513
SETD9	1.446	0.5325	6.588	4.497	0.00517
MXD1	-1.84	-0.88	8.977	-4.497	0.00517
BTF3	1.156	0.2097	10.15	4.495	0.005181
HLA-DOA	-1.756	-0.8125	7.656	-4.492	0.005212
MAOA	1.28	0.3563	8.799	4.491	0.005212
KIDINS220	1.223	0.2899	8.253	4.491	0.005212
YWHAQ	1.154	0.2071	10.91	4.49	0.005221
GPNMB	1.667	0.7373	9.454	4.489	0.005224
AHNAK2	1.481	0.5664	10.82	4.484	0.00528
SLCO3A1	-1.321	-0.4016	7.839	-4.483	0.005281
ACPP	1.581	0.6604	5.736	4.483	0.005281
RPS24	1.186	0.2464	11.09	4.483	0.005281
SCGB3A1	1.989	0.9917	6.703	4.481	0.005299
FETUB	2.34	1.227	4.452	4.479	0.005303
BPIFB1	1.156	0.2089	12.73	4.479	0.005303
ATP5J	1.162	0.2165	11.07	4.477	0.005322
E2F5	-1.56	-0.6418	7.259	-4.476	0.005323
TMEM59	1.159	0.2133	10.87	4.476	0.005323
TRIM14	-1.253	-0.3251	8.954	-4.477	0.005323
NCK1	-1.456	-0.5418	8.723	-4.474	0.005332
PLSCR1	-1.363	-0.4471	10.03	-4.474	0.005336
RNF130	1.377	0.4618	9.073	4.47	0.005376
HLA-L	-1.44	-0.5262	6.669	-4.465	0.005402
MFAP2	1.452	0.5381	6.895	4.467	0.005402
MMP2	1.488	0.5737	7.342	4.465	0.005402
TNS3	1.526	0.6102	6.463	4.466	0.005402
ZC3H12A	-1.642	-0.7157	9.265	-4.465	0.005402
AGPAT1	1.209	0.2733	8.937	4.461	0.005448
POU2F3	-2.023	-1.016	6.591	-4.46	0.005457
HAGH	1.244	0.3147	8.237	4.458	0.005473
CERS2	1.229	0.2976	8.744	4.456	0.005496
RIPK4	1.281	0.3569	8.996	4.455	0.005502
C2	-1.552	-0.6343	6.964	-4.452	0.005534
CHST4	-2	-1	6.392	-4.449	0.005551
CRABP2	1.38	0.4647	7.946	4.449	0.005551
CIITA	-1.571	-0.652	8.543	-4.448	0.005551
HIST1H4E	1.221	0.2882	10.88	4.449	0.005551
GAS6-AS1	2.03	1.021	5.86	4.443	0.005615
GNAI2	1.203	0.2665	9.329	4.44	0.005642
P2RY6	1.55	0.6325	6.427	4.439	0.005648
METRN	1.52	0.6043	6.082	4.437	0.005667
CARD11	-1.46	-0.5461	5.945	-4.436	0.005676
NBEA	-1.251	-0.323	9.211	-4.436	0.005677
ERI3	1.234	0.3033	8.947	4.434	0.005691
OAZ1	1.158	0.2117	10.58	4.431	0.005729
FUZ	1.182	0.2411	11.02	4.426	0.005782
CAB39L	1.273	0.348	7.584	4.426	0.005784
PLEKHG7	-1.297	-0.3752	9.119	-4.424	0.005805
CYP2A13	1.576	0.656	7.19	4.422	0.00582
TSTD1	1.313	0.393	9.027	4.421	0.005833
RACK1	1.178	0.2366	11.6	4.42	0.00584
KLLN	1.527	0.6106	5.609	4.415	0.005895
FAM8A1	-1.24	-0.3101	7.897	-4.414	0.005897
SLC16A4	-1.905	-0.9296	6.776	-4.414	0.005897
DLG2	-1.722	-0.7843	4.404	-4.412	0.005906
VWA1	1.339	0.4212	7.021	4.412	0.005906
HMG20B	1.212	0.277	8.802	4.41	0.005923
OR2B6	-1.716	-0.7787	4.23	-4.409	0.005923
ANPEP	1.713	0.7762	7.768	4.409	0.005923
PLEKHA4	-1.414	-0.5002	5.95	-4.41	0.005923
TMBIM6	1.145	0.1952	12.13	4.409	0.005923
NDUFA4	1.185	0.2455	11.27	4.406	0.005945
SCP2	1.257	0.3305	10.24	4.406	0.005945
LGMN	-1.552	-0.6338	8.993	-4.404	0.005967
TGFB2	1.339	0.4209	9.683	4.402	0.005989
NDUFS8	1.221	0.2877	8.837	4.399	0.006025
SMTNL1	-1.434	-0.5203	4.942	-4.398	0.00603
CABYR	1.378	0.4623	5.952	4.397	0.006032
RHOA	1.149	0.2001	11.08	4.396	0.006038
SH3BGRL3	1.371	0.4554	10	4.396	0.006038
FBXO27	1.564	0.6453	5.877	4.392	0.006081
RPS15	1.166	0.222	12.11	4.389	0.00612
TOMM34	1.201	0.2643	9.774	4.384	0.006174
MOV10	-1.424	-0.5104	8.132	-4.384	0.006174
ASRGL1	1.449	0.5353	6.944	4.384	0.006174
TBC1D1	-1.364	-0.4476	7.171	-4.382	0.006186
SLC11A2	-1.621	-0.6968	8.083	-4.381	0.006186
ATP5G1	1.273	0.3487	9.947	4.382	0.006186
CAT	1.472	0.5581	8.69	4.383	0.006186
TTC9	-1.244	-0.3154	9.625	-4.38	0.00619
MGST1	1.256	0.3291	10.58	4.377	0.006234
IDH3G	1.209	0.2734	10.82	4.376	0.006241
CAPN3	-1.576	-0.6562	7.599	-4.375	0.006241
CFI	-1.538	-0.6212	7.718	-4.375	0.006242
MAN2B1	1.268	0.3426	7.762	4.374	0.006243
PZP	1.417	0.5025	9.427	4.373	0.006253
ELL2	1.227	0.2956	9.656	4.37	0.006262
MET	-1.356	-0.4393	9.367	-4.371	0.006262
PLAUR	-2.521	-1.334	6.975	-4.372	0.006262
UBA1	1.201	0.2638	9.642	4.371	0.006262
WDR54	1.272	0.3466	8.885	4.37	0.006262
NDUFAF3	1.184	0.2432	10.77	4.369	0.006271
TMEM205	1.332	0.4133	7.591	4.369	0.006271
HSPA1A	1.3	0.378	9.804	4.365	0.006307
CYP7B1	1.621	0.6965	4.886	4.366	0.006307
CYP21A2	-2.287	-1.194	4.35	-4.364	0.006317
TAAR3P	-1.735	-0.7946	3.32	-4.364	0.006317
CSF3	-3.069	-1.618	6.468	-4.36	0.006364
JADE2	-1.506	-0.5903	7.928	-4.36	0.006364
BIK	-1.261	-0.3344	7.592	-4.357	0.006393
TYMP	-1.436	-0.5217	8.612	-4.355	0.006416
CD40	-1.322	-0.4029	7.512	-4.354	0.006423
DTX3L	-1.294	-0.3722	9.118	-4.351	0.006451
ARNT	1.236	0.3054	8.363	4.352	0.006451
HIBADH	1.316	0.3961	8.271	4.347	0.006514
LOC100133211	-1.741	-0.7998	4.829	-4.344	0.00655
PDZD7	1.559	0.6408	4.076	4.341	0.00658
FNDC3A	-1.358	-0.4414	8.205	-4.339	0.006603
ERCC1	1.259	0.3321	8.885	4.338	0.006612
ALDH18A1	1.285	0.3614	8.483	4.337	0.006632
ZNF350	-1.719	-0.7818	5.571	-4.336	0.006637
ZBTB4	1.274	0.3492	8.165	4.334	0.006657
ISYNA1	1.519	0.6034	8.673	4.33	0.006702
THTPA	-1.355	-0.4382	7.841	-4.33	0.006702
CAP2	1.345	0.4279	8.886	4.327	0.006747
FGF2	-1.796	-0.8451	4.293	-4.325	0.006767
LGALS2	-1.739	-0.7983	5.185	-4.324	0.006769
LPIN2	-1.341	-0.4238	7.086	-4.324	0.006769
ATP5G2	1.231	0.2998	10.33	4.314	0.006918
NDNF	1.445	0.5313	3.869	4.314	0.006918
TRIM25	-1.215	-0.281	9.874	-4.313	0.006931
CD55	-1.189	-0.2502	11.06	-4.312	0.006938
MAB21L2	-1.625	-0.7006	5.065	-4.31	0.006951
RPS6	1.254	0.3267	10.43	4.31	0.006951
SYTL3	-1.188	-0.2482	8.701	-4.31	0.006951
PARP1	1.339	0.4212	7.751	4.309	0.006952
RPL35A	1.166	0.222	10.25	4.308	0.006959
BLVRA	1.29	0.3674	8.081	4.306	0.006981
BDKRB1	1.784	0.8353	5.071	4.304	0.007004
MAP3K8	-1.525	-0.6085	8.601	-4.303	0.007007
CAMK1D	1.237	0.3069	8.003	4.303	0.007007
CHCHD5	1.302	0.381	7.837	4.303	0.007007
MAN1C1	2.027	1.019	6.148	4.302	0.007018
CYP2W1	-1.402	-0.4871	6.448	-4.296	0.007099
LDOC1	1.628	0.7031	5.884	4.295	0.007114
CPNE3	1.338	0.4198	8.162	4.291	0.007166
COPE	1.193	0.2544	10.01	4.289	0.007199
MSMB	1.326	0.4067	10.66	4.288	0.007199
HLA-DPA1	-1.6	-0.678	9.732	-4.287	0.007211
FKBP9	1.263	0.3372	9.856	4.287	0.007215
CMBL	1.395	0.4802	6.411	4.284	0.007243
BAMBI	1.342	0.4239	6.936	4.284	0.007243
EIF2AK1	1.218	0.2841	9.744	4.284	0.007244
ATP13A2	1.311	0.3912	7.372	4.282	0.007269
MGLL	1.32	0.4005	8.786	4.281	0.007271
AGA	1.307	0.3867	7.427	4.281	0.007271
BNIPL	1.465	0.5506	7.777	4.28	0.007276
CCDC112	1.381	0.4653	6.065	4.279	0.007276
CDKL1	1.498	0.5827	8.754	4.279	0.007276
UBA6	-1.542	-0.6247	7.18	-4.277	0.007297
NDUFA3	1.184	0.2439	10.53	4.276	0.0073
RHOF	-1.593	-0.6719	5.968	-4.277	0.0073
GDE1	1.29	0.367	8.94	4.273	0.007342
LOC100287402	1.581	0.6604	6.032	4.27	0.007399
AKR1B10	1.866	0.8999	6.735	4.269	0.007399
BARX2	-1.482	-0.568	5.543	-4.269	0.007399
SAMM50	1.211	0.2766	8.92	4.267	0.007415
ABCC9	2.136	1.095	5.191	4.266	0.007431
BCAP29	-1.592	-0.6707	7.609	-4.262	0.007492
TLE2	1.347	0.4293	6.574	4.262	0.007492
NSMCE1	1.315	0.3955	7.88	4.261	0.007502
SLC25A35	1.443	0.5287	6.818	4.26	0.007502
PCDHB4	1.605	0.6824	5.219	4.26	0.007502
SLC16A1	-1.586	-0.6651	6.856	-4.259	0.007502
PCMTD2	1.282	0.3587	7.481	4.258	0.007513
APEX1	1.243	0.3133	9.604	4.257	0.007515
RTL8C	1.36	0.4433	7.15	4.257	0.007515
MAD2L1BP	-1.33	-0.4119	7.983	-4.258	0.007515
AGL	1.432	0.5181	7.099	4.255	0.007528
RPS17	1.188	0.2485	11.33	4.256	0.007528
ESM1	-1.552	-0.6338	4.589	-4.25	0.007596
GMNC	1.411	0.4972	6.92	4.25	0.007596
PDLIM4	1.286	0.363	6.713	4.25	0.007596
EIF3H	1.173	0.2304	9.903	4.251	0.007596
CCDC186	-1.231	-0.3	9.045	-4.249	0.007605
USP15	-1.415	-0.5008	8.701	-4.248	0.007605
ZNF829	-1.583	-0.6623	4.609	-4.247	0.007618
ABLIM1	1.316	0.3966	11.08	4.247	0.007618
TMEM106C	1.343	0.4254	7.822	4.246	0.007619
INO80D	-1.318	-0.3986	7.887	-4.246	0.007621
PLPPR3	1.686	0.7534	5.934	4.245	0.007622
HLA-DQB2	-1.519	-0.6027	5.247	-4.244	0.007635
FAM13A	-1.225	-0.2931	7.565	-4.243	0.007636
FSTL1	-1.285	-0.3618	7.528	-4.244	0.007636
CRYM	1.276	0.3518	8.119	4.243	0.007636
PRPF8	1.39	0.4748	9.328	4.24	0.00768
ANTXR1	1.357	0.4402	9.355	4.24	0.00768
DUSP19	1.451	0.5375	6.406	4.237	0.007711
ATAD2	1.422	0.5081	5.546	4.236	0.007711
SAA1	-1.495	-0.5804	11.62	-4.237	0.007711
ALG14	1.516	0.6	6.108	4.233	0.007767
BLZF1	-1.457	-0.543	8.94	-4.233	0.007767
NUDT14	1.285	0.3616	9.112	4.23	0.007797
VEGFA	-1.456	-0.5424	7.992	-4.228	0.00783
ACTR10	1.207	0.2718	8.565	4.227	0.00785
TCF7L1	1.461	0.5472	6.628	4.226	0.00785
PYCR2	1.216	0.2817	9.557	4.226	0.007854
STEAP3	1.344	0.4265	10.63	4.225	0.007857
KARS	-1.19	-0.2505	8.618	-4.223	0.007867
MED11	1.246	0.3172	8.237	4.224	0.007867
NRG2	-1.595	-0.6735	6.675	-4.223	0.007867
RASEF	-1.25	-0.3214	8.263	-4.221	0.0079
LAS1L	1.335	0.4169	6.704	4.22	0.007906
LRRTM2	-1.553	-0.6353	3.274	-4.215	0.007995
CSTF3	-1.188	-0.248	8.957	-4.211	0.008017
CUX1	1.205	0.269	9.578	4.211	0.008017
ADCY4	-1.855	-0.8914	4.261	-4.211	0.008017
LRIG1	1.4	0.4851	9.346	4.211	0.008017
COLCA1	2.202	1.139	6.725	4.211	0.008017
MATN2	1.795	0.8443	6.957	4.213	0.008017
SEMA4A	1.333	0.4147	8.272	4.212	0.008017
TAGLN2	1.234	0.3032	10.64	4.211	0.008017
CCL4	-2.09	-1.063	3.997	-4.21	0.008026
C16orf52	-1.287	-0.3641	7.587	-4.207	0.008068
HEXDC	-1.419	-0.5045	6.439	-4.206	0.008071
COTL1	1.265	0.3396	7.63	4.206	0.008075
PIGV	-1.344	-0.4265	7.347	-4.201	0.00816
HIST1H2BD	-1.386	-0.4711	8.365	-4.2	0.008167
C12orf74	-1.304	-0.3828	9.891	-4.199	0.008182
PRICKLE4	-1.524	-0.6083	6.522	-4.197	0.008214
CCNL1	-1.411	-0.4963	8.287	-4.193	0.008285
CD44	1.391	0.4763	8.802	4.192	0.008291
HSPA2	1.519	0.6034	8.13	4.187	0.00837
NME4	1.383	0.4673	8.086	4.187	0.00837
PHPT1	1.254	0.3271	9.381	4.186	0.008378
TMEM19	1.289	0.3662	7.784	4.186	0.008378
FGD2	-1.915	-0.9374	5.686	-4.184	0.008399
NAA30	1.247	0.3188	7.176	4.183	0.008411
SLC25A5	1.21	0.2749	10.18	4.18	0.008462
AGRN	-1.324	-0.4052	8.068	-4.18	0.008462
FZD1	1.398	0.4833	8.176	4.179	0.008467
TMEM165	-1.377	-0.4614	8.819	-4.178	0.00847
RTN2	1.49	0.5751	6.331	4.178	0.00847
HACD4	1.209	0.2734	9.843	4.176	0.00851
TBC1D8B	1.627	0.702	5.167	4.171	0.008597
LATS2	-1.315	-0.3955	7.163	-4.168	0.008634
FYTTD1	-1.268	-0.342	8.373	-4.168	0.008634
CARD16	-1.57	-0.6505	6.86	-4.167	0.008643
PSMA4	-1.328	-0.4089	8.857	-4.167	0.008643
SLC1A4	1.299	0.3774	6.621	4.167	0.008643
BRD2	-1.177	-0.2346	9.392	-4.165	0.008664
BEX3	1.394	0.4791	6.597	4.164	0.008671
CFB	-1.535	-0.6179	11.4	-4.164	0.008671
CNFN	1.46	0.5459	6.408	4.162	0.008699
ANKRD66	1.34	0.4218	9.188	4.161	0.008713
CCNI	1.201	0.2642	11.01	4.159	0.008724
PI4K2B	-1.407	-0.4926	7.851	-4.16	0.008724
MYORG	1.253	0.3254	9.491	4.16	0.008724
THOC7	1.232	0.3007	8.546	4.156	0.008774
TANGO6	-1.823	-0.8665	5.361	-4.156	0.008781
CTNNAL1	1.429	0.5145	6.663	4.153	0.008836
SLC25A11	1.167	0.2231	9.225	4.152	0.008848
YPEL3	1.158	0.2121	9.856	4.151	0.008851
LDLR	-1.411	-0.4963	9.818	-4.15	0.008876
NAT6	1.391	0.4759	7.002	4.149	0.008887
BCL2A1	-2.93	-1.551	5.35	-4.148	0.008888
FBLN5	1.404	0.4898	7.064	4.146	0.00892
SGSM3	-1.219	-0.2855	7.855	-4.144	0.008952
RPL8	1.193	0.2551	11.95	4.144	0.008952
PAQR7	1.416	0.5017	6.631	4.141	0.008993
ACSF2	1.379	0.4635	7.474	4.141	0.008993
CIB1	1.229	0.298	9.386	4.14	0.009002
PLA2G6	1.401	0.486	7.307	4.14	0.009002
HDX	-1.6	-0.678	5.868	-4.139	0.009012
TMEM238	1.201	0.2642	8.426	4.139	0.009012
CXorf65	-1.488	-0.5731	2.65	-4.137	0.009021
HIVEP1	-1.424	-0.5096	6.591	-4.138	0.009021
BPNT1	1.253	0.3253	8.517	4.132	0.009104
CPNE8	-1.384	-0.4693	9.14	-4.132	0.009104
ACO2	1.18	0.2386	10.28	4.132	0.009104
ANKFY1	-1.239	-0.3093	8.544	-4.131	0.009121
DAD1	1.14	0.1888	10.87	4.13	0.009133
OXA1L	1.164	0.2193	10.22	4.129	0.00914
MAP6	1.466	0.5516	9.297	4.128	0.009152
CREBBP	-1.245	-0.3157	9.17	-4.127	0.009182
GDI1	1.191	0.2527	10.15	4.125	0.009207
PHF10	1.239	0.3093	8.378	4.125	0.009207
ATG13	1.23	0.2982	8.636	4.124	0.009207
KPNA7	1.318	0.3984	7.528	4.122	0.009224
KLK12	1.599	0.6775	7.74	4.123	0.009224
USP6NL	-1.261	-0.334	8.19	-4.123	0.009224
TMCO5A	1.553	0.6352	5.158	4.12	0.009265
IRF2	-1.232	-0.3016	8.629	-4.12	0.009267
RNF152	1.428	0.5138	7.621	4.117	0.009322
SLC4A4	1.866	0.9	5.936	4.116	0.009322
SPATS2L	-1.214	-0.2797	10.99	-4.115	0.009325
IL3RA	-1.547	-0.6298	5.01	-4.116	0.009325
ORAI3	1.282	0.3588	7.987	4.115	0.009325
CRIP1	1.409	0.495	9.613	4.11	0.009424
CHAC1	-1.722	-0.7841	8.388	-4.11	0.009425
XPO1	-1.271	-0.3455	7.604	-4.108	0.009443
C22orf15	1.345	0.4274	7.42	4.107	0.009473
SYNGR4	-1.747	-0.8051	4.185	-4.105	0.009499
ZDHHC2	1.355	0.4387	7.019	4.103	0.009524
LY6D	1.67	0.7401	7.535	4.103	0.009524
ARRB2	1.28	0.356	9.348	4.102	0.009538
RIC1	-1.342	-0.4248	6.927	-4.102	0.009538
EREG	-2.209	-1.143	4.835	-4.101	0.009548
OLFM2	1.455	0.5414	5.222	4.1	0.009561
NUTF2	1.256	0.3292	9.673	4.098	0.009594
ENTPD3	1.343	0.425	7.255	4.098	0.009594
CSTL1	-1.777	-0.8293	3.296	-4.097	0.009609
MCL1	-1.228	-0.2961	10.83	-4.096	0.009621
TMX1	-1.209	-0.2733	8.83	-4.095	0.009628
BCL2L15	-2.136	-1.095	6.539	-4.095	0.00963
TLE4	-1.205	-0.2692	9.17	-4.094	0.00963
COLCA2	1.584	0.6631	7.914	4.093	0.00964
MCTP2	-1.276	-0.3519	6.767	-4.092	0.009661
BAG6	1.147	0.1982	10.05	4.088	0.009738
RND3	-1.411	-0.4969	9.389	-4.087	0.009743
MUC21	-2.27	-1.183	7.013	-4.087	0.009743
FAM135A	-1.511	-0.5956	6.888	-4.088	0.009743
TMTC4	1.469	0.5551	7.468	4.083	0.009818
VAV3	1.558	0.6394	5.949	4.081	0.00986
ADGRL3	1.539	0.6221	4.688	4.079	0.009872
BOD1L1	-1.286	-0.3629	7.129	-4.079	0.009872
YEATS2	-1.39	-0.4753	6.734	-4.079	0.009872
TAPBP	-1.217	-0.2831	10.59	-4.08	0.009872
BACH2	-1.509	-0.5939	4.655	-4.077	0.009914
MAP1B	1.66	0.7311	8.376	4.075	0.009937
RORA	-1.274	-0.3495	7.204	-4.075	0.009937
MRPS16	1.237	0.3064	8.209	4.074	0.009948
COMT	1.194	0.2557	9.139	4.073	0.009964
CPEB2	-1.512	-0.5963	6.257	-4.07	0.01001
SPOCK1	1.483	0.5688	5.485	4.07	0.01001
MYH10	1.188	0.2482	9.307	4.069	0.01003
CROT	1.394	0.4789	7.256	4.069	0.01003
IFITM2	-1.174	-0.2319	11.67	-4.066	0.01005
IFIT5	-1.34	-0.422	7.196	-4.067	0.01005
ZDHHC20	1.293	0.3711	7.98	4.067	0.01005
BDKRB2	1.483	0.5689	6.445	4.066	0.01005
MYL9	1.485	0.57	9.409	4.065	0.01007
WASHC4	-1.228	-0.2958	7.918	-4.063	0.01012
MOB3C	-1.544	-0.6263	6.983	-4.054	0.01027
RASGRP3	-2.178	-1.123	5.392	-4.055	0.01027
ZNF283	-1.469	-0.5545	5.512	-4.054	0.01027
LAMB2	1.44	0.5263	7.065	4.054	0.01027
C1orf141	1.399	0.4847	7.908	4.055	0.01027
RPL9	1.214	0.2802	10.07	4.054	0.01027
SLC35E1	1.189	0.2503	9.461	4.054	0.01027
LYSMD2	-1.43	-0.5165	5.979	-4.051	0.01033
MRPS34	1.332	0.4133	7.373	4.051	0.01033
SGCB	1.219	0.2858	8.038	4.05	0.01034
ITPRIPL1	1.644	0.7172	5.56	4.047	0.01039
STON2	1.274	0.3491	7.492	4.047	0.01039
ADPRHL1	1.46	0.5462	6.593	4.046	0.0104
CCDC159	1.46	0.5464	6.365	4.045	0.01042
RAB27B	-1.396	-0.4813	7.457	-4.043	0.01046
ECT2L	1.465	0.5506	8.491	4.041	0.0105
POLR2L	1.283	0.3598	9.921	4.037	0.01058
SERPINB2	-1.798	-0.8463	9.949	-4.036	0.0106
NFKB1	-1.251	-0.3236	7.628	-4.034	0.01065
TBCB	1.203	0.2668	8.638	4.033	0.01066
B3GNT2	-1.271	-0.3462	8.973	-4.031	0.01069
ANKK1	-1.28	-0.3559	8.155	-4.03	0.0107
PCDHB16	1.62	0.696	4.994	4.03	0.0107
SORL1	1.548	0.63	6.501	4.03	0.0107
EPS8	-1.424	-0.5101	8.528	-4.029	0.01071
CHSY1	-1.31	-0.3896	7.353	-4.025	0.0108
GSTM2	1.523	0.607	7.359	4.025	0.0108
TMEM5	1.246	0.3178	7.583	4.021	0.01087
PROCR	-1.682	-0.7498	4.965	-4.021	0.01087
RPS19	1.194	0.2558	10.36	4.02	0.01089
ATP10A	-1.559	-0.641	5.914	-4.015	0.011
NSD1	-1.319	-0.3992	7.09	-4.015	0.011
NR2E1	1.539	0.6218	5.458	4.01	0.0111
STARD4	-1.451	-0.5368	6.892	-4.009	0.01113
CPEB3	-1.396	-0.4809	6.64	-4.008	0.01114
TMX4	1.377	0.4616	7.378	4.007	0.01114
RAD51C	1.319	0.4	6.909	4.007	0.01114
MCCC2	1.261	0.335	8.083	4.007	0.01114
RNF149	-1.383	-0.4679	7.099	-4.003	0.01123
HADH	1.285	0.3616	8.387	4.001	0.01127
OTOP3	-1.903	-0.9282	4.231	-4.001	0.01127
ADAMTS9	-1.562	-0.6438	4.466	-4.001	0.01127
CREBRF	-1.256	-0.3289	7.479	-3.998	0.0113
KLHL20	-1.313	-0.3925	7.5	-3.998	0.0113
GTF3A	1.354	0.4371	8.041	3.997	0.0113
MYH9	1.293	0.3708	8.897	3.999	0.0113
MIF4GD	1.38	0.4648	6.516	3.998	0.0113
SLAMF7	-1.817	-0.8617	4.617	-3.998	0.0113
PDHX	-1.273	-0.3478	7.906	-3.997	0.0113
GBE1	1.335	0.417	6.583	3.996	0.01133
SYNPO2	-1.62	-0.6964	4.492	-3.992	0.01141
ANAPC15	1.385	0.4702	7.381	3.987	0.01154
ZNF618	-1.711	-0.7753	6.193	-3.986	0.01155
THAP5	-1.814	-0.8593	6.22	-3.986	0.01155
YBX2	1.489	0.5746	5.571	3.985	0.01156
ACKR4	-1.841	-0.8802	6.131	-3.985	0.01156
ARL5B	-1.449	-0.535	8.004	-3.983	0.01161
SNX6	-1.267	-0.3418	9.169	-3.981	0.01162
HLTF	1.49	0.575	6.457	3.981	0.01162
TBCD	1.312	0.3922	7.486	3.981	0.01162
BTN2A1	-1.466	-0.5523	7.007	-3.98	0.01163
TSPAN31	1.18	0.2386	9.732	3.98	0.01163
STUB1	1.206	0.2706	8.641	3.978	0.01166
CARM1	1.186	0.246	8.403	3.978	0.01166
NCOA7	-1.578	-0.6585	9.927	-3.978	0.01166
RNF125	1.359	0.4421	2.452	3.978	0.01166
TMCO6	1.337	0.4192	7.104	3.977	0.01166
ZMYND15	-1.36	-0.4432	6.268	-3.977	0.01167
ARRB1	1.389	0.474	7.274	3.976	0.01168
RPS5	1.261	0.3343	9.661	3.976	0.01168
RSU1	1.155	0.2075	10.27	3.975	0.01168
CKB	1.23	0.2988	8.77	3.973	0.01171
CD177	-1.78	-0.8322	6.464	-3.973	0.01171
PORCN	1.339	0.4211	8.859	3.973	0.01171
CDIPT	1.237	0.307	9.464	3.972	0.01172
RAB37	1.47	0.5562	7.414	3.972	0.01172
WNT10A	1.634	0.7084	5.408	3.97	0.01176
HLA-DMA	-1.283	-0.3596	10.96	-3.967	0.01183
KRT75	1.72	0.7828	6.25	3.967	0.01183
NDRG3	1.238	0.3081	8.821	3.966	0.01185
GDNF-AS1	1.437	0.5227	4.927	3.964	0.01187
DSG3	1.547	0.6296	8.381	3.964	0.01187
TMEM63A	-1.251	-0.3236	8.919	-3.965	0.01187
LRP1	1.563	0.6444	7.325	3.963	0.01188
THEMIS2	-1.963	-0.9733	5.818	-3.963	0.01188
ADAM17	-1.344	-0.4269	7.491	-3.962	0.01191
AKR7A2	1.277	0.3525	7.898	3.961	0.01193
MGAM	-1.56	-0.6417	6.684	-3.956	0.01204
FAM172A	1.402	0.4874	7.562	3.954	0.01208
KLHDC9	1.32	0.4001	7.898	3.953	0.01209
GPD2	-1.422	-0.508	8.043	-3.953	0.01209
PLEKHB2	1.26	0.3338	8.505	3.952	0.01209
BCL6	1.142	0.1919	11	3.954	0.01209
CASP8	-1.451	-0.5373	8.289	-3.953	0.01209
ULK1	1.525	0.609	7.312	3.951	0.0121
PTTG1	1.487	0.572	5.826	3.952	0.0121
PSME1	-1.23	-0.2983	9.166	-3.95	0.01213
ITGA3	-1.213	-0.2786	9.526	-3.949	0.01216
GCLC	1.242	0.3132	9.45	3.947	0.01217
MLEC	1.201	0.2641	9.309	3.947	0.01217
TAF1B	1.49	0.5757	5.519	3.945	0.01222
NFKB2	-1.625	-0.7009	8.016	-3.943	0.01226
PLPP1	1.216	0.282	8.698	3.943	0.01226
FFAR2	-1.625	-0.7004	2.936	-3.942	0.01229
GPX8	1.418	0.5038	6.552	3.939	0.01237
R3HDM1	1.32	0.4005	7.766	3.935	0.01243
GPS1	1.193	0.2544	9.091	3.935	0.01243
MMP14	-1.299	-0.3777	10.21	-3.936	0.01243
S100A2	1.354	0.437	10.35	3.936	0.01243
ETS2	-1.163	-0.2175	9.499	-3.934	0.01244
MOCS2	1.34	0.4218	7.829	3.933	0.01247
PRKX	1.342	0.4244	7.8	3.932	0.0125
RBM43	-1.415	-0.5005	6.291	-3.931	0.01251
GPM6B	1.669	0.739	6.521	3.927	0.01262
GNS	1.155	0.2075	10.64	3.925	0.01264
MCUB	-1.545	-0.6276	7.223	-3.926	0.01264
PTPRH	-1.642	-0.7151	5.645	-3.925	0.01264
SMDT1	1.226	0.2938	8.465	3.925	0.01265
MSI2	1.302	0.3809	8.792	3.924	0.01266
ITGB8	-1.274	-0.3498	9.594	-3.924	0.01266
ARHGEF38	-1.326	-0.4069	8.964	-3.919	0.01277
MT1M	-1.56	-0.6412	6.746	-3.918	0.01279
GULP1	-1.315	-0.3947	7.273	-3.915	0.01287
RPL34	1.165	0.2199	11.17	3.914	0.01287
UGDH	1.194	0.2555	9.679	3.915	0.01287
ZNF91	1.239	0.3096	7.508	3.915	0.01287
C2CD2	-1.284	-0.361	7.476	-3.911	0.01297
PLAT	-1.956	-0.9678	6.456	-3.91	0.01297
APPL2	1.374	0.4581	7.573	3.91	0.01297
FAM117A	1.358	0.4415	6.007	3.909	0.01299
RIPK2	-1.434	-0.5202	7.485	-3.908	0.013
AKAP17A	-1.283	-0.36	7.147	-3.908	0.01301
TRAK2	1.324	0.4044	7.672	3.907	0.01303
2010-03-01	1.299	0.3778	9.154	3.906	0.01304
ACTR1B	1.19	0.2505	8.606	3.904	0.01309
KLHL2	1.252	0.3243	8.014	3.902	0.01312
KRT4	1.678	0.7471	9.889	3.902	0.01312
ACO1	1.587	0.6665	6.816	3.902	0.01312
TNFSF13	-1.813	-0.8586	6.143	-3.902	0.01312
RSRC2	-1.165	-0.2201	8.989	-3.899	0.01319
RNF13	1.165	0.2205	9.836	3.898	0.01321
DAG1	1.251	0.3234	8.493	3.897	0.01323
KCNJ2	-1.405	-0.491	6.781	-3.897	0.01323
ATP5F1	1.246	0.3177	9.521	3.896	0.01324
PARP6	-1.268	-0.3429	8.144	-3.895	0.01328
IL23A	-2.099	-1.07	6.151	-3.893	0.01329
TACR1	1.667	0.7374	5.408	3.894	0.01329
IL17C	-1.838	-0.8783	6.148	-3.893	0.0133
WDR64	-1.338	-0.4203	2.41	-3.89	0.01336
ROPN1L	1.155	0.2075	11.99	3.891	0.01336
ALDH9A1	1.227	0.2951	8.273	3.89	0.01337
PADI2	-1.635	-0.7091	4.219	-3.888	0.0134
MASTL	-1.499	-0.5841	5.268	-3.888	0.0134
CSTB	-1.165	-0.2208	11.53	-3.887	0.01341
MAP4	1.217	0.2837	9.262	3.887	0.01341
SLC16A6	-1.582	-0.6614	4.593	-3.887	0.01341
ANKRD13A	-1.263	-0.3373	8.765	-3.881	0.01357
IRF2BP2	1.245	0.3157	8.436	3.88	0.01359
MCM8	1.274	0.3495	7.905	3.88	0.01359
FAM126B	-1.368	-0.4517	7.315	-3.877	0.01369
MKRN2OS	-1.432	-0.518	5.601	-3.874	0.01376
ANXA8	1.371	0.4556	7.666	3.874	0.01376
RTKN2	-1.678	-0.747	5.749	-3.871	0.01382
AMPD3	-1.214	-0.2799	8.161	-3.871	0.01382
CRAT	1.274	0.3493	7.361	3.87	0.01385
CLCN3	1.207	0.2718	9.533	3.866	0.01396
OAS2	-1.29	-0.3672	9.816	-3.866	0.01396
NDUFA9	-1.242	-0.3126	8.93	-3.863	0.01403
TICAM1	-1.47	-0.5559	5.918	-3.863	0.01404
TMEM14A	1.413	0.499	6.888	3.862	0.01404
MRPL44	-1.303	-0.3816	7.79	-3.862	0.01405
SLC37A2	1.31	0.3897	7.254	3.859	0.01411
GUF1	1.213	0.279	7.775	3.859	0.01413
CEBPB	-1.269	-0.3435	7.586	-3.856	0.0142
LAPTM5	-2.075	-1.053	7.697	-3.856	0.0142
GADD45A	-1.408	-0.4934	9.044	-3.855	0.01421
UBN1	-1.257	-0.3304	7.67	-3.855	0.01421
ATG7	-1.258	-0.3307	8.112	-3.853	0.01427
VSIR	-1.393	-0.478	6.966	-3.85	0.01436
TNKS2	-1.175	-0.2326	9.006	-3.849	0.01438
CDK12	-1.248	-0.3195	6.846	-3.847	0.01442
PXDC1	1.249	0.3208	7.464	3.846	0.01445
CAPN9	2.113	1.079	6.329	3.842	0.01455
THRSP	-1.481	-0.5663	2.874	-3.841	0.01458
SLC47A2	1.908	0.9321	7.059	3.84	0.0146
KLHDC2	1.24	0.3101	7.546	3.839	0.0146
POLR2E	1.208	0.2727	9.948	3.839	0.0146
IRF2BPL	1.389	0.4736	6.506	3.839	0.0146
CACNB1	-1.335	-0.4165	7.589	-3.84	0.0146
TRIM5	-1.587	-0.6666	7.369	-3.839	0.0146
ASS1	-1.306	-0.3851	9.758	-3.838	0.01461
SPACA9	1.245	0.3167	10.33	3.835	0.0147
IRAK2	-1.968	-0.9765	5.477	-3.835	0.0147
GYG2	1.461	0.5473	7.045	3.834	0.01474
CDC42SE2	-1.241	-0.311	8.784	-3.833	0.01475
APRT	1.256	0.3289	7.24	3.832	0.01476
NDUFB2	1.264	0.3383	6.811	3.832	0.01476
DIP2A	-1.279	-0.3549	7.42	-3.831	0.01478
ZNF608	1.276	0.3518	8.431	3.831	0.01478
MTF2	-1.321	-0.4022	7.279	-3.829	0.01483
DUT	1.316	0.3964	7.023	3.828	0.01484
SCRN3	1.28	0.3556	7.099	3.828	0.01484
HLA-DQA1	-1.79	-0.8399	10.34	-3.825	0.01493
HEPACAM2	1.433	0.5186	2.576	3.824	0.01495
LPCAT4	-1.386	-0.4704	8.284	-3.822	0.015
CFH	-1.383	-0.4673	9.336	-3.82	0.01505
PPA1	-1.319	-0.3994	7.181	-3.82	0.01505
OSMR	-1.345	-0.4273	7.682	-3.82	0.01505
RAB40B	1.373	0.4576	6.671	3.82	0.01506
KDM6A	-1.347	-0.4301	6.431	-3.819	0.01506
CDC42EP2	-1.597	-0.675	6.878	-3.818	0.0151
EPS8L1	-1.39	-0.4748	7.231	-3.817	0.0151
DUSP22	-1.203	-0.2666	8.444	-3.817	0.0151
TOP2B	1.305	0.3836	8.092	3.815	0.01512
VDAC1	1.2	0.2633	9.652	3.815	0.01512
KMT5C	1.249	0.3212	7.331	3.815	0.01512
UBAP2L	1.14	0.1887	10.71	3.816	0.01512
TNFSF14	-1.372	-0.4562	5.723	-3.813	0.01517
CHST3	1.468	0.5541	4.822	3.813	0.01517
GSTM3	1.47	0.556	3.336	3.812	0.01519
CRTAP	1.264	0.3377	9.126	3.809	0.01529
C20orf96	1.248	0.3195	8.658	3.808	0.01532
DCXR	1.208	0.272	8.456	3.808	0.01532
SLC27A2	1.219	0.2853	10.08	3.807	0.01535
IL7R	-1.878	-0.9095	4.088	-3.806	0.01536
FBXO15	1.55	0.6326	6.722	3.805	0.01537
CCDC3	1.872	0.9043	5.395	3.805	0.01537
SGF29	-1.242	-0.3129	8.093	-3.804	0.01539
F5	1.701	0.7661	4.649	3.798	0.01558
HPS3	1.221	0.2876	8.137	3.798	0.01558
PEPD	1.237	0.3066	8.406	3.795	0.01569
2002-09-01	1.154	0.2061	8.309	3.793	0.01573
RALGPS2	-1.276	-0.3517	6.959	-3.792	0.01577
SLC39A6	1.198	0.2606	8.52	3.789	0.01584
SCCPDH	1.247	0.3179	8.194	3.79	0.01584
SLC3A2	-1.305	-0.3844	9.589	-3.786	0.01597
WFDC6	1.838	0.878	6.664	3.784	0.016
WWC1	-1.335	-0.4165	8.554	-3.784	0.016
C2orf66	-1.413	-0.499	5.757	-3.784	0.016
MIER1	-1.303	-0.3819	7.472	-3.784	0.016
STYK1	-1.317	-0.3969	6.527	-3.783	0.01603
F3	-1.24	-0.3108	10.18	-3.782	0.01604
LOC107985208	-1.477	-0.5631	5.917	-3.781	0.01605
POLK	-1.202	-0.2654	8.197	-3.78	0.01609
CARD17	-2.318	-1.213	5.239	-3.779	0.01611
PSTPIP2	-1.859	-0.8941	6.735	-3.777	0.01615
MAPK8IP1	1.353	0.4363	7.722	3.778	0.01615
LPAR6	-1.398	-0.4838	8.574	-3.774	0.01625
ZNF599	1.257	0.3302	7.67	3.774	0.01625
ERCC2	1.232	0.3008	7.337	3.774	0.01625
SLC25A4	1.209	0.2741	9.93	3.773	0.01625
KCNN3	-1.408	-0.4937	6.033	-3.771	0.01632
PSMD8	1.146	0.197	9.61	3.771	0.01632
C15orf48	-3.02	-1.595	6.637	-3.771	0.01632
ZNF562	-1.298	-0.3761	8.613	-3.769	0.01637
STATH	2.004	1.003	7.041	3.769	0.01637
FRS2	-1.23	-0.2982	7.706	-3.767	0.01641
SHISA2	1.531	0.6142	4.899	3.767	0.01641
NAMPT	-1.332	-0.4133	8.217	-3.765	0.01646
SH2D1B	-3.047	-1.607	5.887	-3.765	0.01646
AKR1B1	1.38	0.4645	8.024	3.765	0.01646
CBR4	1.25	0.3219	7.518	3.765	0.01646
ZNF652	1.349	0.4319	8.585	3.764	0.01649
CASK	1.234	0.3028	8.277	3.762	0.01653
TGFBR1	1.418	0.5034	6.788	3.761	0.01656
NTMT1	-1.346	-0.4292	6.194	-3.76	0.0166
EIF4E3	-1.221	-0.2882	7.672	-3.758	0.01664
STX18	-1.204	-0.2679	8.529	-3.755	0.01674
PAPLN	1.548	0.6301	4.399	3.755	0.01674
FURIN	1.305	0.3843	6.813	3.753	0.01681
ALOX15	1.502	0.5865	10.46	3.752	0.01684
ATP8B2	1.43	0.5163	5.415	3.751	0.01686
SLC8A2	-1.51	-0.5949	3.592	-3.75	0.01689
DUSP2	-1.407	-0.4926	5.447	-3.749	0.01692
ASPH	-1.154	-0.2072	10.39	-3.747	0.01699
UQCRC2	1.141	0.1901	10.67	3.747	0.01699
COX4I1	1.271	0.3463	8.032	3.746	0.01701
TTC3	1.309	0.389	9.219	3.743	0.0171
ARL15	1.385	0.4701	6.157	3.742	0.01712
CXCL8	-1.805	-0.8522	8.907	-3.742	0.01713
ARHGDIB	1.466	0.5522	6.98	3.741	0.01714
ERGIC3	1.144	0.1939	10.16	3.741	0.01714
RTN3	1.181	0.2397	9.518	3.736	0.01731
KRTAP11-1	-1.447	-0.5334	3.548	-3.735	0.01735
KIAA0040	-1.321	-0.4017	8.226	-3.735	0.01736
BMPR2	-1.233	-0.3024	8.433	-3.733	0.0174
METTL26	1.231	0.3003	7.842	3.733	0.0174
LOC101927057	-1.318	-0.3984	8.046	-3.73	0.01751
RPL30	1.179	0.2372	10.22	3.73	0.01751
LMF1	1.235	0.3049	7.891	3.727	0.01761
CREB3L2	1.301	0.3793	8.307	3.726	0.01762
APELA	1.555	0.6367	4.298	3.725	0.01764
CHMP2A	1.126	0.1718	9.739	3.722	0.01776
BZW2	1.248	0.3195	7.285	3.722	0.01777
SMG7	-1.204	-0.2682	9.618	-3.721	0.01777
KIFAP3	1.192	0.2534	8.503	3.721	0.01779
ADAM22	1.509	0.594	3.187	3.72	0.0178
KDM7A	-1.306	-0.3851	8.113	-3.719	0.01782
ADAM8	-1.684	-0.7522	5.618	-3.718	0.01787
BICD2	1.404	0.4894	7.005	3.716	0.01788
RAB38	1.37	0.4538	6.692	3.716	0.01788
IFIT3	-1.663	-0.7338	10.1	-3.717	0.01788
ARL6IP4	1.277	0.3531	8.561	3.716	0.01788
PGAP1	-1.355	-0.4379	6.927	-3.716	0.01788
WDR6	1.333	0.4147	6.472	3.715	0.01792
FAIM2	1.584	0.6635	6.511	3.713	0.01797
EIF2D	1.298	0.3764	7.851	3.711	0.01805
TCIRG1	-1.2	-0.2632	9.619	-3.708	0.01817
FAM213A	1.174	0.2313	8.237	3.708	0.01817
COX6B2	-1.541	-0.6238	5.85	-3.707	0.01818
PDE4D	-1.414	-0.5001	7.109	-3.704	0.01827
MTMR1	-1.214	-0.2792	8.15	-3.705	0.01827
CRCP	1.148	0.1988	8.987	3.703	0.01831
LGALS9	-1.376	-0.4604	9.922	-3.702	0.01832
MYH11	-1.507	-0.592	3.86	-3.703	0.01832
TMEM68	1.207	0.2714	9.173	3.7	0.01838
AGR3	-1.234	-0.3034	8.958	-3.7	0.01838
ARL5A	1.209	0.2738	8.048	3.698	0.01846
CCNDBP1	1.154	0.2062	9.091	3.696	0.01853
MUC5B	-1.424	-0.5096	6.72	-3.696	0.01854
PTDSS2	1.234	0.3036	7.891	3.694	0.0186
CCT7	1.172	0.2289	9.154	3.692	0.01865
S100A4	1.597	0.6751	8.444	3.692	0.01865
ITSN2	-1.28	-0.356	8.018	-3.691	0.01871
VSTM2L	1.284	0.3601	8.223	3.688	0.01881
FGFR3	1.442	0.5276	6.254	3.688	0.01881
LGALS3BP	-1.287	-0.3635	10.86	-3.683	0.01899
MN1	1.478	0.5641	6.253	3.683	0.019
TM4SF1-AS1	-1.426	-0.5124	3.298	-3.681	0.01906
HM13	-1.306	-0.3847	9.46	-3.679	0.01911
TMEM99	1.407	0.4922	6.765	3.678	0.01915
DNAJC12	1.441	0.5267	3.506	3.677	0.01916
PTGS2	-2.038	-1.027	6.763	-3.677	0.01916
UBL5	1.196	0.2579	9.648	3.677	0.01916
GRAMD2B	-1.308	-0.3869	8.265	-3.678	0.01916
MYADM	1.199	0.2615	9.553	3.677	0.01916
ALDH3B1	1.228	0.2958	10.68	3.676	0.01918
CDC25C	1.362	0.4453	2.996	3.675	0.01921
ROS1	1.721	0.7834	4.397	3.674	0.01924
HBEGF	-2.039	-1.028	6.269	-3.673	0.01926
NCAM1	1.856	0.8919	5.048	3.673	0.01926
CABCOCO1	1.238	0.3083	9.988	3.672	0.01927
TSKU	1.334	0.4155	9.421	3.67	0.01935
HLA-DPB1	-1.437	-0.5233	9.378	-3.67	0.01935
C5orf56	-1.646	-0.7186	6.119	-3.67	0.01935
CD83	-1.866	-0.8996	4.133	-3.669	0.01939
ZNF217	-1.176	-0.2344	9.357	-3.667	0.01943
ZFAND2A	-1.288	-0.3647	6.72	-3.667	0.01944
ZNF716	1.464	0.5503	2.538	3.665	0.0195
UBE2Z	-1.26	-0.3338	9.379	-3.664	0.01954
ZNF644	-1.198	-0.2609	7.995	-3.664	0.01954
SBNO2	-1.245	-0.3158	9.639	-3.663	0.01956
APOE	1.493	0.5782	6.698	3.663	0.01956
UPF1	-1.211	-0.2763	8.447	-3.663	0.01956
TRIB1	-1.535	-0.6182	9.14	-3.661	0.0196
ACSL1	-1.203	-0.2671	9.021	-3.661	0.0196
HPS4	-1.183	-0.242	8.267	-3.661	0.0196
CHD2	-1.276	-0.3514	7.578	-3.66	0.01962
GSR	1.235	0.3049	9.185	3.659	0.01962
NDUFS5	1.206	0.2708	9.718	3.659	0.01962
PTPRR	-1.753	-0.8094	3.841	-3.659	0.01962
ABTB1	1.461	0.5471	6.024	3.659	0.01962
CCL20	-2.13	-1.091	8.782	-3.657	0.01968
FBXO39	-1.533	-0.6168	5.241	-3.656	0.01972
SNX8	-1.375	-0.4592	6.535	-3.654	0.0198
SCARB2	-1.392	-0.4767	7.64	-3.653	0.01986
CMC4	1.517	0.6013	7.358	3.651	0.0199
FOXI3	1.66	0.7311	3.972	3.65	0.01994
HELB	-1.424	-0.5101	5.567	-3.648	0.02001
VPS51	1.435	0.5215	6.306	3.648	0.02002
AKAP10	-1.23	-0.2982	7.148	-3.647	0.02003
DHRS13	-1.548	-0.6302	7.13	-3.647	0.02004
ADGRF1	-1.183	-0.2429	10.07	-3.645	0.02014
TMPRSS4	-1.234	-0.3037	9.419	-3.642	0.02023
DUSP23	1.208	0.2722	8.318	3.641	0.02026
RHOU	-1.208	-0.2727	8.543	-3.641	0.02026
INHBA	1.672	0.7412	7.485	3.64	0.02027
KCNJ16	1.561	0.642	6.578	3.64	0.02027
NFAT5	-1.243	-0.3139	8.659	-3.638	0.02034
CYGB	1.325	0.4057	6.788	3.638	0.02034
WDR98	-1.242	-0.3129	6.942	-3.638	0.02034
XPNPEP1	-1.194	-0.2554	9.765	-3.638	0.02034
TBC1D17	1.194	0.2553	8.027	3.637	0.02035
BCL10	-1.281	-0.3568	6.558	-3.637	0.02035
DENND3	-1.453	-0.5387	6.317	-3.636	0.02039
TNFAIP6	-2.361	-1.239	4.996	-3.634	0.02045
PIGN	1.297	0.3749	6.965	3.633	0.02051
RPL18	1.127	0.1727	11.4	3.63	0.0206
CIR1	-1.152	-0.2042	9.458	-3.63	0.02061
HSD11B1	-2.303	-1.203	3.765	-3.629	0.02066
TMEM218	1.335	0.4166	7.376	3.627	0.0207
DLG1	-1.142	-0.1916	9.565	-3.627	0.02072
FAM3B	1.516	0.5999	6.286	3.623	0.02088
ATP5J2	1.198	0.2604	11.02	3.623	0.02088
PREPL	1.189	0.2502	8.77	3.622	0.02089
RABEP2	-1.295	-0.3732	6.605	-3.621	0.02095
CCDC59	-1.297	-0.3755	7.682	-3.62	0.02097
PNRC2	-1.177	-0.2356	9.12	-3.619	0.021
PSCA	1.128	0.1733	12.5	3.619	0.02102
ATP5L	1.168	0.2243	10.03	3.618	0.02105
CRYZ	1.345	0.4279	6.196	3.617	0.02108
EXOC3L4	-1.4	-0.4855	3.168	-3.616	0.0211
MYH14	-1.234	-0.3029	8.376	-3.614	0.02115
NREP	1.426	0.5117	6.383	3.615	0.02115
TEX261	1.203	0.2667	9.218	3.613	0.02122
MTMR2	1.162	0.2161	8.728	3.611	0.02129
RABEPK	1.45	0.5357	5.779	3.61	0.02132
APP	1.148	0.1989	10.24	3.607	0.02144
RBL2	1.259	0.3323	8.317	3.607	0.02144
TCF20	-1.195	-0.2575	8.126	-3.607	0.02144
DCTN3	1.296	0.3744	8.527	3.605	0.0215
STAT5A	-1.364	-0.4479	6.859	-3.603	0.02159
BANF1	1.194	0.2553	10.32	3.603	0.02159
CYP20A1	1.287	0.3638	6.806	3.602	0.02164
MEN1	1.214	0.2801	8.054	3.6	0.02168
TRERF1	1.213	0.2788	8.437	3.6	0.02168
NOS1	-1.301	-0.3799	2.844	-3.599	0.02174
PCGF5	-1.414	-0.4995	7.503	-3.598	0.02178
RNFT2	1.806	0.8528	5.604	3.597	0.0218
METTL5	1.205	0.2694	8.741	3.595	0.02187
TMEM192	1.311	0.3904	6.114	3.594	0.02191
TP73	1.213	0.2788	8.487	3.594	0.02194
DSTN	1.244	0.3155	9.931	3.593	0.02196
GSTA2	1.792	0.8412	6.737	3.593	0.02196
ABCD3	1.199	0.262	9.498	3.591	0.02202
CD81	1.222	0.2895	9.962	3.59	0.02205
PRDX1	1.165	0.2205	10.77	3.589	0.02208
B3GNT7	-1.136	-0.1835	9.978	-3.589	0.02209
TFRC	1.239	0.3095	7.517	3.588	0.0221
RAB6A	1.151	0.2034	10.08	3.587	0.02216
FAM104B	1.164	0.2194	9.374	3.586	0.02222
RREB1	-1.145	-0.1954	9.697	-3.585	0.02226
AKAP12	-1.614	-0.6902	5.43	-3.584	0.02226
RGPD4	-1.7	-0.7656	4.533	-3.583	0.02229
PROX1	-1.6	-0.6779	4.713	-3.582	0.02233
GTF2F1	-1.173	-0.2298	8.726	-3.58	0.02242
LARS	1.265	0.3391	7.911	3.58	0.02242
ARHGAP12	-1.228	-0.2957	7.969	-3.579	0.02244
FICD	-1.31	-0.3893	7.035	-3.579	0.02246
API5P1	1.393	0.4786	2.194	3.578	0.0225
BMP2	-1.563	-0.6443	5.859	-3.577	0.02254
OLFML2A	1.331	0.4124	6.698	3.575	0.02262
PDE1A	1.621	0.6968	5.328	3.571	0.0228
TIMP4	1.212	0.2779	8.595	3.57	0.02283
COG3	-1.184	-0.2434	7.701	-3.57	0.02283
CRYAB	1.759	0.8144	6.355	3.569	0.02286
GRINA	-1.141	-0.1907	10.12	-3.568	0.02291
NT5DC1	1.285	0.362	7.488	3.567	0.02294
ATP5A1	1.194	0.2555	9.222	3.565	0.02304
BBC3	-1.669	-0.739	5.75	-3.564	0.02306
BRCA1	1.514	0.5986	4.075	3.564	0.02306
BTC	-1.387	-0.4716	6.957	-3.563	0.02312
NDUFB10	1.209	0.2734	8.367	3.562	0.02316
CSRP1	1.229	0.2979	9.809	3.561	0.02317
ACP2	-1.411	-0.4966	8.975	-3.56	0.02324
MBD3L1	-1.508	-0.593	4.018	-3.559	0.02326
CREB1	-1.24	-0.3098	8.34	-3.556	0.02337
BTD	1.209	0.274	7.562	3.556	0.02337
ERMP1	1.358	0.442	8.53	3.555	0.02343
MORN5	1.36	0.4439	8.535	3.554	0.02344
PEX14	-1.209	-0.2736	7.568	-3.554	0.02344
NRBP1	-1.203	-0.2668	8.727	-3.553	0.02348
PXMP4	1.236	0.3057	7.45	3.551	0.02361
WLS	1.26	0.3336	8.398	3.548	0.02374
PAPD5	-1.181	-0.2398	8.413	-3.547	0.02378
ACP6	1.304	0.3824	6.952	3.546	0.02381
YAF2	-1.222	-0.2894	6.983	-3.545	0.02383
SAP18	-1.184	-0.2433	10.45	-3.545	0.02383
MAFF	-1.472	-0.5579	7.205	-3.543	0.02394
NPDC1	1.252	0.3242	7.494	3.542	0.02394
PDCD1LG2	-1.915	-0.9375	5.838	-3.542	0.02394
BROX	1.159	0.213	9.016	3.542	0.02395
DTNB	1.349	0.4322	6.448	3.538	0.02409
EIF4EBP1	1.261	0.3342	7.328	3.538	0.02409
FNBP4	-1.235	-0.3049	8.387	-3.539	0.02409
TRUB2	1.225	0.2931	7.264	3.539	0.02409
NEIL2	1.5	0.585	5.613	3.537	0.02411
WDR83OS	1.182	0.2409	7.507	3.538	0.02411
UBL3	1.171	0.2273	9.6	3.537	0.02411
EVA1C	-1.305	-0.3843	8.81	-3.537	0.02411
UCP2	1.21	0.2752	10.59	3.536	0.02411
SLC23A1	1.669	0.7388	9.736	3.537	0.02411
MORC1	-1.284	-0.3601	2.593	-3.536	0.02414
ASPHD2	-1.512	-0.5964	4.314	-3.535	0.02414
CETN2	1.175	0.2329	12.17	3.535	0.02417
MYCBP2	-1.321	-0.4012	7.955	-3.534	0.02418
DMKN	1.173	0.2297	10.57	3.534	0.02419
PCDH7	-1.34	-0.4219	7.505	-3.53	0.02436
BLNK	-1.206	-0.2703	7.241	-3.529	0.02441
MSS51	-1.401	-0.4861	5.533	-3.528	0.02445
NOXRED1	-1.48	-0.5657	4.644	-3.528	0.02445
ACSL3	-1.167	-0.2226	9.102	-3.527	0.02451
PDZD2	-1.263	-0.3366	6.823	-3.525	0.02457
SNX11	-1.24	-0.31	7.563	-3.525	0.02457
NT5C3B	1.173	0.2303	8.065	3.523	0.0246
EXOC3L1	-1.444	-0.5303	5.295	-3.524	0.0246
ELOVL5	1.146	0.197	10.3	3.523	0.0246
MGME1	-1.313	-0.3932	6.655	-3.524	0.0246
TSPAN12	1.353	0.4367	6.874	3.523	0.02462
SPRED1	-1.271	-0.3455	6.878	-3.522	0.02463
ADGRF4	1.442	0.5286	5.701	3.522	0.02463
PPM1B	-1.259	-0.3326	8.32	-3.522	0.02463
RBCK1	-1.26	-0.3335	7.31	-3.52	0.02471
CFAP206	1.161	0.2153	10.09	3.519	0.02472
FBXO3	1.229	0.2977	8.179	3.52	0.02472
PHLPP2	-1.493	-0.578	5.88	-3.519	0.02473
MAOB	1.767	0.8217	4.738	3.516	0.02484
PNPO	1.211	0.2757	7.639	3.516	0.02484
APOBEC3B	-2.342	-1.228	6.154	-3.517	0.02484
SMARCD2	1.184	0.2441	9.637	3.516	0.02485
NAA38	1.265	0.339	8.184	3.516	0.02485
STOM	-1.207	-0.2719	10.13	-3.515	0.02488
ADSSL1	1.402	0.4879	7.306	3.514	0.02491
IKZF2	-1.236	-0.3053	8.887	-3.514	0.02492
AP1M2	1.202	0.2649	8.991	3.513	0.02496
STK26	1.284	0.3607	6.937	3.512	0.02501
MRPL2	1.25	0.3214	7.903	3.51	0.02506
ALX1	-1.473	-0.5588	2.957	-3.51	0.02508
PYGL	1.191	0.2526	8.568	3.509	0.02511
MCM2	-1.286	-0.3627	6.281	-3.507	0.02521
B3GALT5	1.461	0.5468	5.135	3.505	0.02529
SMARCD3	1.446	0.5321	5.611	3.504	0.02536
TLR4	-1.398	-0.4831	7.545	-3.502	0.02548
CDK2AP1	1.169	0.225	9.28	3.499	0.02559
KREMEN1	1.416	0.5018	8.632	3.499	0.02559
COX5A	-1.182	-0.2407	9.812	-3.499	0.02559
LARP7	-1.274	-0.3489	7.532	-3.497	0.02567
SLC45A4	1.232	0.301	8.282	3.497	0.02567
PHYH	1.469	0.555	6.927	3.496	0.02573
TRAP1	1.224	0.2912	7.634	3.495	0.02574
UPRT	1.23	0.2983	7.677	3.495	0.02574
COX6A1	1.149	0.2009	10.03	3.494	0.02581
UQCRC1	1.164	0.2192	9.295	3.491	0.02595
PCCB	1.196	0.2585	8.136	3.49	0.02598
PTGR2	1.223	0.2901	8.053	3.487	0.02616
HNF4A	-1.402	-0.4873	2.717	-3.486	0.02616
PAPPA	1.387	0.4716	4.276	3.486	0.02616
SYTL2	-1.193	-0.2547	9.036	-3.487	0.02616
RRAGD	1.24	0.3108	7.542	3.486	0.02616
CHP2	1.521	0.6051	4.731	3.486	0.02616
NCAPG2	1.646	0.7186	5.007	3.485	0.02617
POM121	-1.171	-0.2281	8.319	-3.485	0.02617
FAM216A	1.476	0.5616	5.235	3.484	0.02622
TET2	-1.178	-0.2365	8.856	-3.483	0.02626
MTURN	1.299	0.3771	7.175	3.483	0.02627
ERG28	1.125	0.1703	10.98	3.481	0.02638
SLC18B1	-1.228	-0.2967	9.041	-3.48	0.02639
CCNI2	-1.431	-0.5165	5.911	-3.48	0.02639
PNPLA4	1.409	0.4951	6.845	3.477	0.02655
TMEM92	-1.722	-0.7843	6.056	-3.477	0.02656
ERGIC1	1.163	0.2177	10.32	3.475	0.02665
ACAP3	1.269	0.3438	6.731	3.474	0.02669
ANAPC16	1.133	0.1804	9.456	3.473	0.02672
TNFSF15	-1.639	-0.7126	4.564	-3.473	0.02673
TINF2	-1.329	-0.4108	8.542	-3.471	0.02681
MDFIC	1.254	0.3267	7.335	3.471	0.02681
MRPL23	1.268	0.3424	6.494	3.47	0.02683
ATP6V0C	1.128	0.1734	11.53	3.469	0.0269
ZMIZ2	-1.222	-0.2887	8.416	-3.468	0.02694
PCDH19	1.706	0.7706	6.152	3.465	0.02708
SCAMP5	1.334	0.4154	5.64	3.465	0.0271
RNF145	-1.301	-0.3796	8.957	-3.465	0.02711
ADH1B	1.605	0.6822	5.777	3.463	0.02716
CFAP65	1.208	0.2725	10.1	3.463	0.02717
MID1	1.226	0.2939	9.12	3.462	0.02723
SRSF8	1.25	0.3216	7.441	3.46	0.02733
MYD88	-1.318	-0.3984	9.72	-3.46	0.02733
SLC7A8	1.361	0.445	8.205	3.454	0.02767
HPN-AS1	-1.385	-0.4703	5.211	-3.452	0.02776
ELP2	1.305	0.3838	6.961	3.452	0.02776
WDR93	1.189	0.2498	8.53	3.452	0.02776
LOC101926887	-2.153	-1.106	3.358	-3.451	0.0278
RASGRF1	-1.537	-0.6203	5.287	-3.45	0.02783
TSG101	1.149	0.2008	9.291	3.45	0.02784
DENND1A	-1.282	-0.3582	6.499	-3.449	0.02788
HCAR3	-1.402	-0.4877	6.496	-3.449	0.02788
OR10J5	-1.483	-0.5687	2.815	-3.448	0.02789
MTSS1	1.248	0.3201	9.117	3.447	0.02794
CYP24A1	-1.938	-0.9547	8.029	-3.446	0.02802
MID2	-1.233	-0.302	7.588	-3.445	0.02803
HLA-DRA	-1.177	-0.2354	11.72	-3.445	0.02804
CHTOP	-1.184	-0.2432	8.636	-3.444	0.02805
TMC4	1.127	0.1728	10.33	3.444	0.02808
KCNK15	1.364	0.4477	6.085	3.442	0.02817
LDHB	1.207	0.2715	9.476	3.441	0.02821
G6PD	1.203	0.2669	9.361	3.44	0.02825
RNF167	1.172	0.2294	8.273	3.44	0.02826
GPAA1	1.228	0.2958	9.181	3.44	0.02826
C8orf59	1.497	0.5818	5.885	3.439	0.02827
NT5E	-1.903	-0.9284	6.632	-3.439	0.02828
ITGB4	1.28	0.3557	8.872	3.436	0.02845
COX11	1.206	0.2697	7.433	3.435	0.02847
R3HDM2	-1.203	-0.267	8.447	-3.435	0.02847
RAP2A	1.396	0.4809	5.878	3.435	0.02847
ENTPD6	-1.381	-0.4658	7.254	-3.435	0.02848
PDZK1IP1	-1.781	-0.8323	9.809	-3.432	0.02861
ARAP1	-1.315	-0.3948	6.348	-3.431	0.02861
EFNA3	1.38	0.4647	6.403	3.432	0.02861
STAP2	-1.161	-0.2158	8.289	-3.432	0.02861
NECTIN1	1.28	0.3561	8.035	3.432	0.02861
DPM3	1.317	0.3974	7.72	3.431	0.02863
PUM2	1.159	0.213	9.032	3.429	0.02876
FAM89B	1.245	0.3165	7.269	3.427	0.02883
S1PR5	1.529	0.6129	5.509	3.427	0.02883
NIPSNAP2	1.162	0.2166	9.124	3.426	0.02888
DOT1L	-1.366	-0.4501	6.163	-3.425	0.02891
DDAH1	1.2	0.2635	8.82	3.425	0.02893
CYB5A	1.277	0.3528	9.582	3.424	0.02894
HIGD2A	1.232	0.3015	9.545	3.422	0.02906
COL4A3BP	-1.171	-0.2279	8.63	-3.42	0.02915
ATMIN	-1.192	-0.254	8.65	-3.421	0.02915
TEP1	-1.354	-0.4375	6.89	-3.42	0.02915
XDH	-1.773	-0.8259	6.868	-3.42	0.02915
ACSS3	1.418	0.504	5.536	3.42	0.02915
SLC2A1	1.143	0.1926	10.73	3.418	0.02926
NRM	1.31	0.3893	6.521	3.417	0.02934
C4orf33	-1.3	-0.3787	7.044	-3.416	0.02935
MXI1	1.196	0.2583	8.37	3.415	0.02942
MS4A8	1.29	0.3679	11.3	3.414	0.02942
COLEC10	1.357	0.4406	4.552	3.412	0.02954
ATAD3B	-1.375	-0.4594	5.578	-3.412	0.02954
GCHFR	1.418	0.5043	7.233	3.411	0.02956
AP3M1	1.211	0.2763	8.755	3.412	0.02956
STAU2	1.177	0.2347	8.69	3.411	0.02957
AKAP14	1.297	0.3757	10.26	3.41	0.02959
NADK	-1.313	-0.3932	9.506	-3.41	0.02959
FAM171B	1.469	0.555	5.728	3.409	0.0296
FAM83B	-1.227	-0.2953	7.84	-3.41	0.0296
ALDOC	1.341	0.4235	6.038	3.41	0.0296
PAX6	1.247	0.3184	7.668	3.409	0.02962
RAP2C	-1.239	-0.3091	7.619	-3.408	0.02967
CIART	-1.353	-0.4362	7.767	-3.406	0.02975
ADAMTSL4-AS1	-1.439	-0.5248	6.08	-3.406	0.02975
GLRA3	-1.305	-0.384	2.406	-3.406	0.02975
SLC10A1	1.37	0.4537	4.767	3.405	0.02979
CXXC5	1.221	0.2879	8.486	3.403	0.02995
ZNF362	1.251	0.3234	6.996	3.401	0.03003
ARHGEF9	1.224	0.2912	8.193	3.4	0.03003
PPP1R12B	-1.395	-0.4802	6.676	-3.401	0.03003
ELMSAN1	-1.337	-0.4185	6.955	-3.4	0.03003
NCOA6	-1.162	-0.2164	9.208	-3.399	0.03008
SERPINB9	-1.572	-0.6525	6.629	-3.399	0.03008
PKM	1.18	0.2387	10.95	3.399	0.03008
PDCD2L	-1.328	-0.4098	6.431	-3.399	0.03008
CTNNB1	1.167	0.2224	10.41	3.398	0.03011
GTF2E2	-1.288	-0.3651	7.932	-3.397	0.03014
BIRC2	-1.289	-0.3664	7.617	-3.397	0.03014
HGSNAT	1.212	0.2769	8.556	3.396	0.03022
RNASE4	1.672	0.742	6.991	3.395	0.03023
SAT1	-1.122	-0.1658	11.61	-3.395	0.03025
CRYL1	1.265	0.3395	7.514	3.394	0.03031
CNNM4	-1.196	-0.2588	8.07	-3.393	0.03037
FAM111B	1.562	0.6438	5.268	3.392	0.03037
ATP5O	1.135	0.1832	9.911	3.391	0.0304
APH1B	1.231	0.2994	7.45	3.392	0.0304
PLK4	1.44	0.5258	5.764	3.389	0.03052
RPL12	1.298	0.3767	8.296	3.389	0.03052
SLC22A5	1.256	0.3294	7.852	3.389	0.03052
SORBS2	-1.12	-0.1635	10.12	-3.388	0.03053
PMPCB	1.158	0.2117	9.103	3.388	0.03053
RNF25	-1.259	-0.3328	7.662	-3.388	0.03056
ZNF792	1.543	0.6253	5.039	3.387	0.03058
ADH5	1.215	0.2813	9.439	3.387	0.03058
CDK1	1.575	0.6551	5.2	3.387	0.03059
LOC441155	-1.427	-0.5126	3.61	-3.386	0.0306
RARRES1	-1.739	-0.7984	9.535	-3.386	0.0306
LRRC4	-1.269	-0.3433	7.265	-3.386	0.03061
SERF2	1.173	0.2303	10.31	3.385	0.03065
CA12	1.387	0.4721	7.007	3.384	0.03071
MAPK1	1.137	0.1847	9.297	3.383	0.03072
SLC31A1	1.135	0.183	10.46	3.382	0.03077
SLC28A3	-1.234	-0.3039	7.331	-3.382	0.03078
CBX4	-1.436	-0.5217	7.317	-3.382	0.03078
RAB30	-1.55	-0.6323	5.278	-3.381	0.0308
CDH11	1.307	0.3863	6.276	3.381	0.03083
CACNG8	-1.576	-0.656	4.128	-3.38	0.03087
ATP13A1	-1.132	-0.1791	9.691	-3.379	0.03094
HLA-DRB1	-1.323	-0.404	10.35	-3.378	0.03097
FGG	1.25	0.3218	2.102	3.377	0.03101
GCSAM	-1.522	-0.6057	4.642	-3.376	0.03104
METTL4	-1.268	-0.343	7.147	-3.376	0.03104
TMEM134	1.226	0.2937	7.48	3.376	0.03104
PAPSS1	1.174	0.2309	9.186	3.376	0.03105
LINC02487	-1.435	-0.5209	2.415	-3.374	0.03115
FUT6	-1.311	-0.3905	8.667	-3.373	0.03121
GSTA1	1.401	0.4866	8.796	3.371	0.03135
GJB7	-1.52	-0.604	5.011	-3.368	0.03148
FIBCD1	-1.381	-0.4656	3.747	-3.368	0.03148
ATP10B	-1.54	-0.6233	7.418	-3.367	0.0315
GGT7	-1.241	-0.3121	8.074	-3.368	0.0315
IGHMBP2	-1.255	-0.3279	6.719	-3.367	0.0315
SNX12	1.246	0.3175	7.888	3.366	0.03154
CDCP1	-1.149	-0.1998	9.812	-3.367	0.03154
SH3BP2	-1.215	-0.2811	7.978	-3.364	0.0317
CDK5	1.186	0.2462	8.439	3.361	0.03184
NOTCH3	1.453	0.5386	6.185	3.361	0.03184
C11orf49	1.159	0.2132	9.737	3.362	0.03184
OVOL1	-1.994	-0.9954	5.873	-3.361	0.03185
ARAP2	-1.38	-0.4644	6.118	-3.36	0.03189
GATS	1.202	0.2652	9.91	3.36	0.03189
SNX9	-1.238	-0.3081	8.371	-3.359	0.03191
GSDMC	-1.285	-0.3616	6.627	-3.359	0.03191
PPP1R14C	1.275	0.35	7.399	3.357	0.03206
CEACAM5	-1.347	-0.4296	11.1	-3.355	0.03214
ARHGAP35	1.212	0.2769	9.417	3.355	0.03214
GSTP1	1.146	0.1962	11.89	3.355	0.03214
HSPA1B	1.16	0.214	10.63	3.355	0.03214
FBXO34	-1.227	-0.2949	7.694	-3.354	0.03214
DDHD1	1.299	0.3778	5.958	3.355	0.03214
PIGU	1.263	0.3365	8.1	3.354	0.03215
CNIH3	1.473	0.5591	6.196	3.353	0.03215
IFNB1	-1.357	-0.4403	2.752	-3.354	0.03215
C10orf99	1.835	0.8757	4.762	3.352	0.03215
ZDHHC11B	-2.097	-1.069	4.386	-3.353	0.03215
TGM1	-2	-0.9997	6.547	-3.353	0.03215
MBTPS1	1.246	0.3168	9.32	3.353	0.03215
DPAGT1	1.135	0.1824	10.25	3.351	0.03219
ATP6V1B1	1.564	0.6452	6.291	3.351	0.03219
IARS2	1.249	0.3212	8.272	3.351	0.03219
URI1	1.203	0.2671	8.195	3.351	0.03219
MKL2	1.214	0.2796	8.55	3.351	0.03221
NFIB	1.22	0.2866	9.958	3.35	0.03222
PLXNA2	-1.353	-0.4362	6.386	-3.35	0.03223
OR4X1	-1.467	-0.5532	2.692	-3.349	0.03225
ATP12A	1.183	0.2421	10.4	3.349	0.03225
BACH1	-1.308	-0.3875	7.489	-3.349	0.03225
IL6ST	-1.217	-0.2829	8.096	-3.348	0.03228
ZNF814	1.374	0.4586	6.735	3.347	0.03231
ALDH5A1	1.378	0.4628	6.307	3.348	0.03231
N4BP2L2	-1.203	-0.2663	9.771	-3.344	0.03251
LAMTOR5	1.16	0.2143	9.355	3.344	0.03251
PLCXD1	1.35	0.4334	4.89	3.344	0.03251
LNPK	1.414	0.5	5.851	3.344	0.03252
UEVLD	1.208	0.2725	8.24	3.341	0.03267
NHS	1.408	0.4937	6.225	3.341	0.03271
REEP2	1.586	0.665	5.117	3.34	0.03273
ANXA3	-1.362	-0.4461	8.982	-3.338	0.03287
LCE3E	-1.542	-0.6248	4.491	-3.338	0.03287
NDRG2	1.216	0.2821	9.231	3.337	0.0329
CACUL1	1.153	0.2055	8.894	3.337	0.03291
TMEM150C	1.447	0.5333	5.783	3.336	0.03291
MTNR1A	-1.633	-0.7077	6.255	-3.337	0.03291
PGM2	1.273	0.3484	7.699	3.336	0.03291
RGS2	-2.005	-1.004	4.497	-3.335	0.03296
ARPC1A	1.184	0.2434	9.853	3.334	0.03305
MGST2	1.167	0.2224	8.622	3.333	0.03306
ZNF750	-1.248	-0.3197	7.143	-3.333	0.0331
CEP78	1.263	0.3364	6.635	3.332	0.03315
SLC26A4	-3.045	-1.606	6.493	-3.331	0.03317
TIMM13	1.242	0.3122	8.435	3.331	0.03319
LRP10	-1.187	-0.2473	10.32	-3.33	0.0332
DPY30	1.124	0.1683	10.6	3.33	0.03324
PARK7	1.168	0.2239	9.752	3.328	0.03334
MYO18A	-1.524	-0.6078	7.045	-3.328	0.03334
EFHC2	1.246	0.3171	9.795	3.327	0.03342
TXNL4B	-1.329	-0.4106	7.726	-3.326	0.03345
CLIC6	1.162	0.2166	11.23	3.325	0.03353
USP25	-1.177	-0.2349	8.071	-3.32	0.03384
PCDHB3	1.883	0.9127	3.746	3.318	0.03397
FNDC3B	-1.158	-0.211	10.65	-3.317	0.03402
FCMR	1.488	0.5732	4.683	3.318	0.03402
PIK3R3	1.175	0.233	9.031	3.315	0.03414
KIF20A	1.69	0.7567	5.149	3.315	0.03415
MTF1	-1.143	-0.1932	9.913	-3.315	0.03415
SLC30A7	-1.174	-0.2314	8.054	-3.313	0.03425
PRKACB	1.387	0.4715	6.426	3.313	0.03425
SLC9A2	1.657	0.7287	3.856	3.313	0.03425
MORN3	1.2	0.2627	9.017	3.311	0.03431
PRKD1	1.393	0.4782	3.535	3.311	0.03431
TAF4B	-1.492	-0.5776	3.738	-3.311	0.03431
C1orf116	-1.298	-0.3758	10.31	-3.311	0.03431
INTS5	-1.285	-0.362	6.624	-3.311	0.03431
UQCC2	1.245	0.3156	6.946	3.311	0.03431
RNASE11	-1.402	-0.487	2.577	-3.31	0.03436
ACKR3	1.557	0.6389	7.444	3.309	0.03436
ZNF541	-1.285	-0.362	5.51	-3.31	0.03436
ATP6AP2	1.202	0.266	9.631	3.309	0.03437
SH2B3	-1.433	-0.5191	5.67	-3.308	0.03443
RSPH9	1.251	0.3229	8.684	3.308	0.03443
HDGFL3	1.187	0.2479	7.481	3.308	0.03443
ELP4	1.258	0.3312	7.317	3.304	0.03471
MYBPC2	-1.38	-0.4648	3.102	-3.303	0.03473
RRBP1	-1.198	-0.2605	9.129	-3.302	0.0348
GPR182	-1.376	-0.4608	2.796	-3.302	0.03483
ATOX1	1.245	0.3166	7.678	3.299	0.03506
RPL28	1.106	0.1447	12.18	3.297	0.0352
RTL8B	1.306	0.3848	6.473	3.295	0.03528
TUBG1	1.136	0.1841	10.38	3.293	0.03547
PITPNM1	1.208	0.2724	7.491	3.293	0.03547
POU6F1	-1.325	-0.4062	5.771	-3.292	0.03549
KCNMB4	1.613	0.69	3.741	3.29	0.03562
KLF13	1.314	0.3938	6.786	3.29	0.03562
SOCS2	-1.734	-0.7938	6.27	-3.289	0.03568
MAP3K9	-1.311	-0.391	6.223	-3.288	0.03574
2002-03-01	1.318	0.3981	6.24	3.288	0.03575
[truncated: 16,621 more rows]
